# Supplementary material for: Association of socioeconomic status with medical assistance in dying: a case–control analysis
Source: PubMed Central journal article supplement — BMJ Open. 2021 May 25;11(5):e043547. doi: 10.1136/bmjopen-2020-043547 (PMC8154947; doi:10.1136/bmjopen-2020-043547), 2021-05-25
Supplement: bmjopen-2020-043547.draft_revisions.pdf [file bmjopen-2020-043547.draft_revisions.pdf]

# BMJ Open

BMJ Open is committed to open peer review. As part of this commitment we make the peer review history of every article we publish publicly available.

When an article is published we post the peer reviewers' comments and the authors' responses online. We also post the versions of the paper that were used during peer review. These are the versions that the peer review comments apply to.

The versions of the paper that follow are the versions that were submitted during the peer review process. They are not the versions of record or the final published versions. They should not be cited or distributed as the published version of this manuscript.

BMJ Open is an open access journal and the full, final, typeset and author-corrected version of record of the manuscript is available on our site with no access controls, subscription charges or pay-per-view fees (<http://bmjopen.bmj.com>).

If you have any questions on BMJ Open's open peer review process please email [info.bmjopen@bmj.com](mailto:info.bmjopen@bmj.com)

# BMJ Open

## Association of Socioeconomic Status with Medical Assistance in Dying: A Case Control Analysis

|                               |                                                                                                                                                                                                                  |
|-------------------------------|------------------------------------------------------------------------------------------------------------------------------------------------------------------------------------------------------------------|
| Journal:                      | <i>BMJ Open</i>                                                                                                                                                                                                  |
| Manuscript ID                 | bmjopen-2020-043547                                                                                                                                                                                              |
| Article Type:                 | Original research                                                                                                                                                                                                |
| Date Submitted by the Author: | 08-Aug-2020                                                                                                                                                                                                      |
| Complete List of Authors:     | Redelmeier, Donald; University of Toronto, Medicine<br>Ng, Kelvin; University of Toronto<br>Thiruchelvam, Deva; Institute for Clinical Evaluative Sciences<br>Shafir, Eldar; Princeton University, Public Policy |
| Keywords:                     | Rationing < HEALTH SERVICES ADMINISTRATION & MANAGEMENT, Cancer pain < ONCOLOGY, Adult palliative care < PALLIATIVE CARE, PRIMARY CARE, Health policy < HEALTH SERVICES ADMINISTRATION & MANAGEMENT              |
|                               |                                                                                                                                                                                                                  |

SCHOLARONE™  
Manuscripts

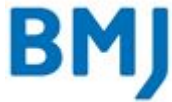

I, the Submitting Author has the right to grant and does grant on behalf of all authors of the Work (as defined in the below author licence), an exclusive licence and/or a non-exclusive licence for contributions from authors who are: i) UK Crown employees; ii) where BMJ has agreed a CC-BY licence shall apply, and/or iii) in accordance with the terms applicable for US Federal Government officers or employees acting as part of their official duties; on a worldwide, perpetual, irrevocable, royalty-free basis to BMJ Publishing Group Ltd ("BMJ") its licensees and where the relevant Journal is co-owned by BMJ to the co-owners of the Journal, to publish the Work in this journal and any other BMJ products and to exploit all rights, as set out in our [licence](#).

The Submitting Author accepts and understands that any supply made under these terms is made by BMJ to the Submitting Author unless you are acting as an employee on behalf of your employer or a postgraduate student of an affiliated institution which is paying any applicable article publishing charge ("APC") for Open Access articles. Where the Submitting Author wishes to make the Work available on an Open Access basis (and intends to pay the relevant APC), the terms of reuse of such Open Access shall be governed by a Creative Commons licence – details of these licences and which [Creative Commons](#) licence will apply to this Work are set out in our licence referred to above.

Other than as permitted in any relevant BMJ Author's Self Archiving Policies, I confirm this Work has not been accepted for publication elsewhere, is not being considered for publication elsewhere and does not duplicate material already published. I confirm all authors consent to publication of this Work and authorise the granting of this licence.

1  
2  
3 Association of Socioeconomic Status with Medical Assistance in  
4  
5  
6 Dying:  
7  
8 A Case Control Analysis  
9  
10  
11  
12  
13  
14  
15

16  
17 Donald A. Redelmeier, MD FRCPC MSHSR FACP [1, 2, 3, 4, 5]  
18

19 Kelvin Ng, BA [1, 2]  
20

21  
22 Deva Thiruchelvam, MSc [2, 3]  
23

24  
25 Eldar Shafir PhD [6, 7]  
26  
27  
28  
29

30 [1] Department of Medicine, University of Toronto  
31

32 [2] Evaluative Clinical Sciences Program, Sunnybrook Research Institute  
33

34 [3] Institute for Clinical Evaluative Sciences  
35

36 [4] Division of General Internal Medicine, Sunnybrook Health Sciences Centre  
37

38 [5] Center for Leading Injury Prevention Practice Education & Research  
39

40 [6] Department of Psychology, Princeton University  
41

42 [7] Woodrow Wilson School of Public and International Affairs  
43

44 Correspondence: Donald A. Redelmeier  
45

46 Sunnybrook Health Sciences Centre, G-151  
47

48 2075 Bayview Ave,  
49

50 Toronto, Ontario, CANADA M4N 3M5  
51

52 voice: (416) 480-6999 fax: (416) 480-6048  
53

54 e.mail: dar@ices.on.ca  
55

56 Running Title: Medical Assistance in Dying  
57  
58  
59  
60

1  
2  
3  
4  
5  
6  
7  
8  
9  
10  
11  
12  
13  
14  
15  
16  
17  
18  
19  
20  
21  
22  
23  
24  
25  
26  
27  
28  
29  
30  
31  
32  
33  
34  
35  
36  
37  
38  
39  
40  
41  
42  
43  
44  
45  
46  
47  
48  
49  
50  
51  
52  
53  
54  
55  
56  
57  
58  
59  
60

Key Words: clinical reasoning; behavioral economics; compassionate care;  
assisted suicide; social inequities; patient empathy;

Word Count: 2,701

For peer review only

1  
2  
3  
4  
5  
6  
7  
8  
9  
10  
11  
12  
13  
14  
15  
16  
17  
18  
19  
20  
21  
22  
23  
24  
25  
26  
27  
28  
29  
30  
31  
32  
33  
34  
35  
36  
37  
38  
39  
40  
41  
42  
43  
44  
45  
46  
47  
48  
49  
50  
51  
52  
53  
54  
55  
56  
57  
58  
59  
60

## ABSTRACT

Objectives: Patients with low socioeconomic status tend to experience less access to care that is typically ascribed to economic constraints. We tested whether the decreased care extends to medical assistance in dying in a healthcare system with no direct economic constraints.

Design: Population-based case-control study of adults who died.

Setting: Ontario, Canada, between June 1, 2016 and June 1, 2019.

Patients: Patients receiving palliative care under universal insurance with no user fees.

Exposure: Patient's socioeconomic status identified using standardized quintiles.

Main Outcome Measures: Whether the patient received medical assistance in dying.

Results: A total of 50,096 palliative care patients died, of whom 920 received medical assistance in dying (cases) and 49,176 did not receive medical assistance in dying (controls). Medical assistance in dying was less frequent for patients with low socioeconomic status (166 of 11,008 = 1.5%) than for those with high socioeconomic status (227 of 9,277 = 2.4%). This equaled a 39% decreased odds of receiving medical assistance in dying associated with low socioeconomic status (odds ratio = 0.61, 95% confidence interval 0.50 to 0.75,  $p < 0.001$ ). The relative decrease was evident across diverse patient groups and after adjusting for age, sex, frailty, home location, malignancy diagnosis, healthcare utilization, and responsible physician.

1 Conclusions: Patients with low socioeconomic status are unlikely to receive  
2  
3 medical assistance in dying under universal health insurance. An awareness of  
4  
5 this imbalance may help in understanding patient choices in less extreme clinical  
6  
7 settings.  
8  
9  
10  
11  
12  
13  
14  
15  
16  
17  
18  
19  
20  
21  
22  
23  
24  
25  
26  
27  
28  
29  
30  
31  
32  
33  
34  
35  
36  
37  
38  
39  
40  
41  
42  
43  
44  
45  
46  
47  
48  
49  
50  
51  
52  
53  
54  
55  
56  
57  
58  
59  
60

## ARTICLE SUMMARY

### Strengths & Limitations

Comprehensive analysis of palliative care patients who died in Canada's largest region assessing socioeconomic inequities around medical assistance in dying.

Detailed statistics adjusting for observed factors, secondary analyses matching on exact responsible physician, and added validation survey testing for unmeasured factors.

Study limitations are inevitable since a randomized trial of medical assistance in dying is not ethical, feasible, or realistic.

Further limitations include the fallibility of estimating socioeconomic status that generally yields analyses that underestimate the magnitude of inequities.

Additional limitations involve scientific interpretation because socioeconomic status can be intertwined with patient preferences, communication patterns, or implicit bias.



## INTRODUCTION

Medical assistance in dying (akin to physician-assisted suicide) is free and legal in Canada.<sup>1</sup> An eligible patient must have a grievous and irremediable disease that causes intolerable suffering where death is reasonably foreseeable.<sup>2</sup> The common indications are metastatic cancer or a progressive neurologic illness.<sup>3</sup> Additional requirements include informed consent, second physician verification, attestation from impartial witnesses, and an interval for reflection.<sup>4</sup> The protocol involves a series of medications including midazolam, propofol, and rocuronium.<sup>5</sup> Rates of medical assistance in dying vary substantially by region and average over 1,000 per year nationally.<sup>6 7</sup> Each case hinges on the concept of compassionate care for a suffering patient.

Socioeconomic status influences medical care in many situations. For example, poor patients relative to rich patients tend to be undertreated in a publicly-funded colon-cancer screening program.<sup>8</sup> To compensate, recommendations to provide care for poor patients have been fundamental in the practice of medicine since antiquity with persistent advocacy to treat those in most need.<sup>9 10 11 12 13</sup> Modern strategies to mitigate inequities tend to focus on situational barriers (eg, access to care) or patient factors (eg, personality traits or community norms) and have not been fully successful.<sup>14 15</sup> In theory, the causes of socioeconomic inequities can be more complicated because medical treatment also depends on human judgment.

People are prone to pitfalls of reasoning in medical care.<sup>16 17</sup> Poor patients, for example, may feel less able to advocate for themselves or be reluctant to express their dissatisfaction.<sup>18 19 20</sup> In addition, clinicians may underestimate the

1 distress experienced by poor patients due to faulty intuitions about a life of  
2 hardships (termed the thick-skinned fallacy).<sup>21 22 23</sup> We hypothesized such  
3 behavioral pitfalls may have implications for medical care, thereby leading to  
4 unequal patterns of care for poor and for rich patients experiencing a similar  
5 serious situation.<sup>24 25</sup> Here we explore how this hypothesis might extend to an  
6 extreme condition requiring understanding and communication; namely,  
7 medical assistance in dying for palliative care patients.  
8  
9  
10  
11  
12  
13  
14  
15  
16  
17

## 18 METHODS

### 19 Study Setting

20 Most Canadian adults strongly support medical assistance in dying, as  
21 indicated by national opinion polls conducted in recent years.<sup>26</sup> This support is  
22 nearly as strong among poor households (<\$40,000 annual income) and rich  
23 households (>\$100,000 annual income).<sup>27</sup> The Supreme Court of Canada ruled on  
24 February 6, 2015 that competent Canadian adults have the right to assistance in  
25 dying regardless of ability-to-pay and set June 17, 2016 as the implementation  
26 date for legalization.<sup>28</sup> In response, medical assistance in dying became a benefit  
27 under universal health insurance in Ontario on June 6, 2016, listed as palliative  
28 care.<sup>29 30</sup> Ontario is Canada's largest province with a population of 13,448,494 in  
29 2016 (study baseline).<sup>31 32</sup>  
30  
31  
32  
33  
34  
35  
36  
37  
38  
39  
40  
41  
42  
43  
44

### 45 Patient Selection

46 We identified older adults (age  $\geq 65$  years) who died with palliative care  
47 (akin to hospice care) using valid linked databases.<sup>33 34 35 36</sup> We included deaths  
48 between June 1, 2016 and June 1, 2019 to reflect all years since legalization of  
49 medical assistance in dying. We identified palliative care by physician fees  
50 (OHIP code: K023) and required at least two contacts in the last month of life to  
51  
52  
53  
54  
55  
56  
57  
58  
59  
60

1 ensure patients had an irremediable condition, death was reasonably foreseeable,  
2 and individuals had access to care.<sup>37</sup> Patients who received medical assistance in  
3 dying were identified from corresponding outpatient pharmacy prescriptions  
4 (ODB codes: 93877101 to 93877106).<sup>38</sup> The remaining patients were defined as  
5 receiving palliative care without medical assistance in dying.  
6  
7  
8  
9  
10  
11  
12  
13

### 14 Socioeconomic Status

15 We identified a patient's socioeconomic status based on the Statistics  
16 Canada official algorithm using the smallest population unit available (size about  
17 500 persons).<sup>39 40 41</sup> These estimates reflected home neighborhood location, did  
18 not rely on self-report, and were validated in past research.<sup>42 43 44 45 46</sup> Individuals  
19 with missing data (<1%) were assigned to the lowest quintile to yield a fully  
20 comprehensive analysis and more conservative estimates. The purpose was to  
21 avoid limitations in past research such as small sample sizes, subjective survey  
22 responses, volunteer participants, or uncontrolled analyses of socioeconomic  
23 status. The main limitation of our approach was random misclassification which  
24 tended to bias comparisons toward the null.<sup>47</sup>  
25  
26  
27  
28  
29  
30  
31  
32  
33  
34  
35  
36  
37  
38  
39  
40

### 41 General Characteristics

42 Information on patient age, sex, and home location was based on linked  
43 demographic databases.<sup>48</sup> Additional linked healthcare databases were used to  
44 identify time of death (season, weekday, year), home location (urban, rural), and  
45 past medical care (clinic contacts, emergency visits, hospital admissions).<sup>49 50</sup> The  
46 Johns Hopkins University Adjusted Clinical Groups (ACG) score was used as an  
47 overall index of health status and general frailty.<sup>51 52</sup> Total medications during  
48 the final year of life were obtained using techniques previously validated at the  
49  
50  
51  
52  
53  
54  
55  
56  
57  
58  
59  
60

1  
2  
3  
4  
5  
6  
7  
8  
9  
10  
11  
12  
13  
14  
15  
16  
17  
18  
19  
20  
21  
22  
23  
24  
25  
26  
27  
28  
29  
30  
31  
32  
33  
34  
35  
36  
37  
38  
39  
40  
41  
42  
43  
44  
45  
46  
47  
48  
49  
50  
51  
52  
53  
54  
55  
56  
57  
58  
59  
60

Institute for Clinical Evaluative Sciences.<sup>53 54</sup> The available databases lacked information on ethnic background, religious affiliation, self-identified race, formal education, advance directives, and death certificate details.

### Clinical Characteristics

We further scanned individually linked outpatient databases in the year prior to death to identify serious medical illnesses with particular attention to malignancy diagnoses (eg, respiratory tract cancer), neurologic diagnoses (eg, Parkinson's disease), and other life-threatening non-malignant diagnoses (eg, congestive heart failure).<sup>55</sup> Further comorbid conditions included common chronic diseases (eg, hypertension). Additional potentially disqualifying psychiatric diagnoses included depression.<sup>56</sup> We also gathered data on specific medications (eg, opioids).<sup>57</sup> The available databases lacked information on functional status, symptom severity, personal rationales, family relationships, social supports, cultural traditions, and informal thoughts.

### Statistical Analysis

The primary analysis examined the distribution of socioeconomic status among patients who received medical assistance in dying compared to controls who did not receive medical assistance in dying using an unpaired chi-square test. Logistic regression was used to further quantify associations using odds ratios to adjust for potential imbalances in demographic characteristics (age, sex, home location), health care utilization (prior year), and general frailty (Johns Hopkins ACG index). Logistic regression was also used to explore additional factors correlated with receiving medical assistance in dying. Calculations of

1  
2 attributable risk and attributable fractions were conducted using population-  
3 based methods.  
4  
5  
6  
7

8 We conducted secondary analyses to validate results by developing a pair-  
9 matched approach (1-to-1 ratio). To do so, we matched palliative care patients  
10 who did and did not receive medical assistance in dying according to age, sex,  
11 home location (urban, rural), and responsible physician (exact name).<sup>58</sup> The  
12 association between socioeconomic status and medical assistance in dying was  
13 then tested using methods suitable for matched designs.<sup>59 60</sup> The protocol was  
14 conducted using privacy safeguards at the Institute for Clinical Evaluative  
15 Sciences and approved by the Sunnybrook Research Ethics board. All analyses  
16 were based on SAS software (version 9.45), used two-tailed p-values, and were  
17 accompanied by 95% confidence intervals where appropriate.  
18  
19  
20  
21  
22  
23  
24  
25  
26  
27  
28  
29  
30  
31

### 32 Survey Validation

34 We conducted a randomized test to indirectly check the association  
35 between socioeconomic status and estimates of patient suffering. In line with  
36 behavioral findings concerning differences in perceived pain among laypeople,<sup>61</sup>  
37 the rationale of this survey was to explore whether clinicians tend to estimate  
38 poor patients as having the same suffering as rich patients in the same situation.  
39 The survey contained a single patient scenario formulated in two versions (rich,  
40 poor) differing by only one sentence (Appendix §1). The rich version described  
41 the patient as having had a lifetime of luxury. The poor version described the  
42 patient as having had a lifetime of hardship. The two versions were otherwise  
43 the same and designed to elicit a clinician's estimate of patient suffering due to  
44 psychosocial or biomedical adverse events.<sup>62</sup>  
45  
46  
47  
48  
49  
50  
51  
52  
53  
54  
55  
56  
57  
58  
59  
60

## Patient and Public Involvement

Patients or the public were not involved in the design, or conduct, or reporting, or dissemination plans of our research.

## RESULTS

### Baseline Characteristics

During the three-year interval a total of 243,880 deaths were identified, of whom 50,096 received palliative care in the last month of life. Overall, 920 patients received medical assistance in dying and 49,176 controls did not receive medical assistance in dying (Table 1). The two groups were similar except those who received medical assistance in dying were slightly more frequent in the later half of the study, relatively more likely to die on a weekday, and somewhat less frail. The typical patient in both groups had a median age of 81 years, was diagnosed with a malignancy, and lived in a city. Three-quarters (72%, n = 36,274) were admitted to hospital in the year before dying and two-thirds (65%, n = 32,312) had an emergency visit in the year before dying.

\*\*\* Table 1 About Here \*\*\*

Table 1. Patient Characteristics

|                                   |            | Medical Assistance in Dying (n = 920) | Palliative Control Patients (n = 49,176) |
|-----------------------------------|------------|---------------------------------------|------------------------------------------|
| Age                               | ≤ 75 years | 338 (37)                              | 15,211 (31)                              |
|                                   | > 75 years | 582 (63)                              | 33,965 (69)                              |
| Sex                               | Female     | 484 (53)                              | 24,826 (50)                              |
|                                   | Male       | 436 (47)                              | 24,350 (50)                              |
| Home Location *                   | Urban      | 812 (88)                              | 44,758 (91)                              |
|                                   | Rural      | 108 (12)                              | 4,418 (9)                                |
| Year of Death †                   | 2016 - 17  | 207 (23)                              | 21,532 (44)                              |
|                                   | 2018 - 19  | 713 (77)                              | 27,644 (56)                              |
| Season of Year                    | Spring     | 183 (20)                              | 10,958 (22)                              |
|                                   | Summer     | 198 (22)                              | 12,036 (24)                              |
|                                   | Autumn     | 265 (29)                              | 12,991 (26)                              |
|                                   | Winter     | 274 (30)                              | 13,191 (27)                              |
| Day of Death ¶                    | Weekday    | 778 (85)                              | 35,849 (73)                              |
|                                   | Weekend    | 142 (15)                              | 13,327 (27)                              |
| Malignancy Diagnosis #            | Present    | 661 (72)                              | 35,548 (72)                              |
|                                   | Absent     | 259 (28)                              | 13,628 (28)                              |
| Total Medications in Past Month ‡ | Mean       | 9.1 ± 5.3                             | 9.5 ± 6.2                                |
| Clinic Contacts in Past Year      | Mean       | 26.01 ± 16.02                         | 29.29 ± 18.40                            |
| Emergency Visits in Past Year     | Mean       | 1.33 ± 1.64                           | 1.59 ± 2.06                              |
| Admissions in Past Year           | Mean       | 0.93 ± 1.15                           | 1.53 ± 1.53                              |
| Overall Frailty in Past Year §    | Mean       | 8.62 ± 3.75                           | 10.56 ± 3.65                             |

Footnotes

data are count (percentage) except where noted as mean ± standard deviation

\* missing values assigned to rural (n = 109 of 50,096)

† denotes first 18 months (2016-2017) and second 18 months (2018-2019), respectively

1 ¶ Saturday and Sunday denote weekend  
2  
3 # detailed diagnoses appear in Appendix §2  
4 ‡ detailed medications appear in Appendix  
5 §3  
6  
7 § based on Johns Hopkins Ambulatory Care Groups  
8  
9  
10  
11  
12  
13  
14  
15  
16  
17  
18  
19  
20  
21  
22  
23  
24  
25  
26  
27  
28  
29  
30  
31  
32  
33  
34  
35  
36  
37  
38  
39  
40  
41  
42  
43  
44  
45  
46  
47  
48  
49  
50  
51  
52  
53  
54  
55  
56  
57  
58  
59  
60

For peer review only



## Diagnoses and Treatment

Analysis of individual medical records indicated the two groups of patients had a similar burden of disease in the last year of life (Appendix §2). The most frequent specific malignancies were cancers of the respiratory tract and digestive tract. Important additional diagnoses included congestive heart failure and pulmonary fibrosis. Many patients also had additional comorbidities including hypertension, diabetes, and anxiety. A formal diagnosis of depression was rare in both groups. The most common medication in the last month of life was an opioid analgesic (Appendix §3). The two groups had similar prescription profiles except patients who chose medical assistance in dying were somewhat more likely to be treated with an opioid or a benzodiazepine.

## Socioeconomic Status

Medical assistance in dying was proportionately less frequent for patients with low socioeconomic status (166 of 11,008) than patients with high socioeconomic status (227 of 9,277). Stratified analysis showed intermediate findings for patients with intermediate socioeconomic quintiles (Figure 1). Based on the case-control design, this association equaled a 39% decreased frequency of receiving medical assistance in dying associated with low socioeconomic status relative to high socioeconomic status (odds ratio = 0.61, 95% confidence interval 0.50 to 0.75,  $p < 0.001$ ). The discrepancy equated to a net difference of 306 fewer cases of medical assistance in dying than would have been expected if all patients had the pattern of those in the highest socioeconomic quintile.

\*\*\* Figure 1 About Here \*\*\*

## Secondary Analyses of Subgroups

The decreased frequency of receiving medical assistance in dying associated with low socioeconomic status extended to diverse subgroups. The decrease was evident regardless of age and sex (Figure 2). The decrease was observed in the first half and the second half of the study (and regardless of weekday). Similarly, the decrease was observed for those with and those without a malignancy diagnosis. In addition, the decrease extended to patients regardless of healthcare utilization and frailty. No subgroup showed contrary findings except for rural patients (not significant). All subgroups with at least 50 cases showed a statistically significant decreased frequency of medical assistance in dying associated with low socioeconomic status.

\*\*\* Figure 2 About Here \*\*\*

## Additional Predictors

Several other patient characteristics were associated with a decreased frequency of receiving medical assistance in dying (Table 2). Patients older than 75 years were less likely to receive medical assistance in dying than their younger counterparts. Similarly, patients who had relatively more frailty or relatively more hospital admissions were less likely to receive medical assistance in dying. In contrast, sex, home location, clinic contacts, and emergency department visits were not significantly associated with medical assistance in dying. Accounting for all characteristics suggested that low socioeconomic status was associated with a 37% decreased frequency of receiving medical assistance in dying (odds ratio = 0.63, 95% confidence interval 0.51 to 0.77,  $p < 0.001$ ).

1  
2  
3  
4  
5  
6  
7  
8  
9  
10  
11  
12  
13  
14  
15  
16  
17  
18  
19  
20  
21  
22  
23  
24  
25  
26  
27  
28  
29  
30  
31  
32  
33  
34  
35  
36  
37  
38  
39  
40  
41  
42  
43  
44  
45  
46  
47  
48  
49  
50  
51  
52  
53  
54  
55  
56  
57  
58  
59  
60

\*\*\* Table 2 About Here \*\*\*

For peer review only

Table 2. Predictors of Medical Assistance in Dying

| Variable                        | BASIC ANALYSIS * |                     | ADJUSTED ANALYSIS † |                     |
|---------------------------------|------------------|---------------------|---------------------|---------------------|
|                                 | Relative Risk    | Confidence Interval | Relative Risk       | Confidence Interval |
| Income Quintile ‡               | 0.61             | 0.50 to 0.75        | 0.63                | 0.51 to 0.77        |
| Age > 75 Years                  | 0.77             | 0.67 to 0.88        | 0.71                | 0.62 to 0.82        |
| Male Sex                        | 0.92             | 0.81 to 1.05        | 0.97                | 0.85 to 1.11        |
| Rural Home Location §           | 1.35             | 1.10 to 1.65        | 1.16                | 0.94 to 1.43        |
| Malignancy Diagnosis ¥          | 0.98             | 0.85 to 1.13        | 0.99                | 0.98 to 1.01        |
| Total Medications ^             | 1.00             | 1.00 to 1.01        | 1.02                | 1.01 to 1.02        |
| Clinic Contacts in Past Year ^  | 0.99             | 0.98 to 0.99        | 0.99                | 0.99 to 1.00        |
| Emergency Visits in Past Year ^ | 0.93             | 0.89 to 0.96        | 1.01                | 0.97 to 1.05        |
| Admissions in Past Year ^       | 0.69             | 0.65 to 0.73        | 0.80                | 0.74 to 0.86        |
| Overall Frailty in Past Year ¶  | 0.87             | 0.85 to 0.88        | 0.90                | 0.88 to 0.92        |

Footnotes

\* no adjustment for baseline differences

† adjusted for age, sex, location, malignancy, medications,

contacts, emergencies, admissions, frailty

‡ compares lowest to highest quintile

§ referent is urban location

¥ denotes one or more diagnoses

^ covariate coded as a continuous variable

1  
2  
3  
4  
5  
6  
7  
8  
9  
10  
11  
12  
13  
14  
15  
16  
17  
18  
19  
20  
21  
22  
23  
24  
25  
26  
27  
28  
29  
30  
31  
32  
33  
34  
35  
36  
37  
38  
39  
40  
41  
42  
43  
44  
45  
46  
47  
48  
49  
50  
51  
52  
53  
54  
55  
56  
57  
58  
59  
60

¶ defined by Johns Hopkins frailty index

For peer review only

## Matched Analysis

We rechecked results by comparing each patient who received medical assistance in dying with a matched control (age, sex, home location) who did not receive medical assistance in dying and who was treated by the same responsible physician. This yielded a total of 448 matched pairs (49% matching rate). Overall, the case and the matched control had the same socioeconomic status in 26% pairs (118 of 448), the case had a higher socioeconomic status in 42% pairs (186 of 448) and had a lower socioeconomic status in 32% pairs (144 of 448). This matched analysis suggested a 23% decreased frequency of medical assistance in dying associated with lower socioeconomic status (odds ratio = 0.77, 95% confidence interval 0.62 to 0.96,  $p = 0.021$ ).

## Survey Validation

We surveyed clinicians at a coffee shop inside a leading Canadian hospital that provided medical assistance in dying.<sup>63</sup> Each participant received one version (rich patient or poor patient) of the survey by randomized assignment (Appendix §1). The typical participant was a middle-aged woman with professional training and years of experience ( $n = 494$ ). We found that overall mean estimates of suffering were higher when assessing a rich patient rather than a poor patient in the survey that otherwise contained identical information about an adverse patient event (7.8 vs 7.3,  $p < 0.001$ ). This difference in estimated patient suffering extended to each of the three psychosocial adverse events and not the one biomedical adverse event (Figure 3).

\*\*\* Figure 3 About Here \*\*\*

## DISCUSSION

We studied thousands of deaths in Canada and found that medical assistance in dying was significantly less frequent for palliative care patients with low rather than high socioeconomic status. The imbalance extended through the range of socioeconomic status and was equally strong during initial and later years of the study. The imbalance could not be easily attributed to access to care, ability to pay, medical diagnoses, intensity of medications, choice of physician, responsiveness to treatment, public preferences, thoughtless impulsivity, reciprocal compensation, or community norms.<sup>64 65 66 67 68</sup> The findings also differ from statistics on suicide deaths that are higher among poor rather than rich adults.<sup>69</sup> This practice pattern variation is robust and begs for an explanation.

Our research supports earlier patterns observed in other countries around medical assistance in dying. In particular, patients in the USA undergoing legalized assisted dying are more likely to be highly educated and financially secure compared to the population average.<sup>70 71</sup> Patients in the Netherlands receiving assisted dying are prone to have comparative social, economic, and educational privileges.<sup>72</sup> Patients in Switzerland who undergo assisted suicide tend to live in affluent neighborhoods.<sup>73 74</sup> Patients in Belgium who receive assisted dying tend to have higher education.<sup>75</sup> To our knowledge, these tangential findings apparent in past studies have not been rigorously analyzed and have typically been ascribed to economic constraints.<sup>76</sup>

Our data suggest the unequal distribution of medical assistance in dying may occur beyond aspects of care related to cost.<sup>77</sup> One factor could be faulty

1 doctor-patient communication. Poor patients often feel disempowered to  
2 advocate for themselves, have lower trust in a healthcare system, and may have  
3 less rapport with clinicians who elicit their preferences.<sup>78 79</sup> Religion, ethnicity, or  
4 another confounder could also contribute if rich patients plan more advance  
5 directives or suffer more existential distress.<sup>80 81 82 83</sup> Another possibility is that  
6 clinicians dislike controversy and want to avoid appearing callous towards the  
7 poor.<sup>84</sup> To be sure, our study does not determine the appropriateness of medical  
8 assistance in dying and, for many, the choice is unthinkable.<sup>85 86 87</sup>

21 The observed unequal treatment might also reflect faulty intuition. The  
22 thick-skin bias describes a tendency to perceive individuals of lower income as  
23 less distressed by negative events and reflects an implicit belief that repeated  
24 hardships lead to increased tolerance.<sup>88 89 90</sup> Similar to other implicit biases, this  
25 might originate from a common assumption; specifically, people sometimes  
26 adapt to difficult situations, shift their expectations, and increase their  
27 tolerance.<sup>91 92 93</sup> The intuition fails, however, when hardships lead to resignation  
28 instead of resiliency. In effect, the chronic stress of poverty might not buffer  
29 against the added challenges from ill health.<sup>94</sup> Such faulty intuitions might add to  
30 a paradox of lesser care despite serious clinical needs.<sup>95 96 97</sup>

45 Several more limitations of our study merit emphasis and provide  
46 opportunities for future research. Socioeconomic status measures are imperfect,  
47 tend to bias analyses toward the null, and may underestimate disparities in  
48 care.<sup>98</sup> In addition, disadvantaged groups tend to access palliative care less often  
49 than privileged groups, thereby also causing our study to underestimate  
50 upstream socioeconomic gradients ahead of receiving care.<sup>99 100</sup> The patients



1 were from Canada's largest region and justify replication elsewhere. Medical  
2 assistance in dying, itself, has different meanings depending on available  
3 alternatives and on a patient's system of beliefs.<sup>101 102</sup> The scientific domains of  
4 social inequities and of terminal care are, themselves, contentious topics often  
5 framed by moral principles rather than behavioral economic analysis.<sup>103</sup>  
6  
7  
8  
9  
10  
11  
12  
13  
14

15 Together, our data address lingering misconceptions around the medical  
16 care implications of the Supreme Court of Canada decision. First, medical  
17 assistance in dying has not led to a large drop in palliative care; instead, rates of  
18 palliative care increased during the study.<sup>104</sup> Second, medical assistance in dying  
19 has not become widely popular despite being free and legal; instead, the practice  
20 accounts for fewer than 2% of deaths in palliative care patients.<sup>105</sup> Third, medical  
21 assistance in dying has not been unjustly targeted toward poor patients; instead,  
22 wealthy patients are disproportionately involved.<sup>106 107 108</sup> More broadly, the data  
23 might inform patient engagement in less extreme cases of inequities where poor  
24 patients may feel disempowered and physicians may be disinclined to push.  
25  
26  
27  
28  
29  
30  
31  
32  
33  
34  
35  
36  
37  
38  
39  
40  
41  
42  
43  
44  
45  
46  
47  
48  
49  
50  
51  
52  
53  
54  
55  
56  
57  
58  
59  
60

## ACKNOWLEDGMENTS

We thank Maya Bar-Hillel, Nathan Cheek, Victor Fuchs, Alan Garber, Kevin Imrie, Fizza Manzoor, Dorothy Pringle, Raffi Rush, Michael Schull, Debbie Selby, and Jack Williams for helpful suggestions on specific points.

## FUNDING

This project was supported by a Canada Research Chair in Medical Decision Sciences, the Canadian Institutes of Health Research, the Sloan Foundation, and a Sunnybrook Research Institute Summer Scholarship Award Program. The views expressed are those of the authors and do not necessarily reflect the Ontario Ministry of Health.

## CONFLICTS

The funding organizations had no role in the design and conduct of the study; collection, management, analysis, and interpretation of the data; and preparation, review, or approval of the manuscript. All authors have no financial or personal relationships or affiliations that could influence the decisions and work on this manuscript.

## CONTRIBUTORSHIP

The lead author (DAR) wrote the first draft. All authors (DAR, KN, DT, ES) contributed to study design, manuscript preparation, data analysis, results interpretation, critical revisions and final decision to submit. The lead author (DAR) had full access to all the data in the study, takes responsibility for the integrity of the data and is accountable for the accuracy of the analysis.

## APPROVALS

The protocol was approved by the Sunnybrook Research Ethics board and conducted using privacy safeguards at the Institute for Clinical Evaluative Sciences (ID 001).

## DATA SHARING

The de-identified data collected for this study are available in an appendix included at the time of original manuscript submission and also are available following publication for researchers whose proposed use of data has been approved by an independent review committee. The Johns Hopkins ACG© System is available through the Department of Health Policy and Management at the Johns Hopkins University.

## TRANSPARENCY STATEMENT

The lead author affirms that the manuscript is an honest accurate and transparent account of the study being reported; that no important aspects of the study have been omitted; and that any discrepancies from the study as originally planned have been explained.

## ACCOUNTABILITY

The lead author (DAR) had full access to all the data in the study, takes responsibility for the integrity of the data, and is accountable for the accuracy of the analysis.

## PATIENT AND PUBLIC INVOLVEMENT STATEMENT

1 Patients or the public were not involved in the design, or conduct, or reporting,  
2  
3 or dissemination plans of our research  
4  
5  
6  
7

## 8 DISSEMINATION STATEMENT 9

10 We plan to disseminate the results to patients and patient organizations.  
11  
12  
13  
14  
15  
16  
17  
18  
19  
20  
21  
22  
23  
24  
25  
26  
27  
28  
29  
30  
31  
32  
33  
34  
35  
36  
37  
38  
39  
40  
41  
42  
43  
44  
45  
46  
47  
48  
49  
50  
51  
52  
53  
54  
55  
56  
57  
58  
59  
60

For peer review only

## REFERENCES

- 1  
2  
3  
4  
5  
6  
7  
8  
9  
10  
11  
12  
13  
14  
15  
16  
17  
18  
19  
20  
21  
22  
23  
24  
25  
26  
27  
28  
29  
30  
31  
32  
33  
34  
35  
36  
37  
38  
39  
40  
41  
42  
43  
44  
45  
46  
47  
48  
49  
50  
51  
52  
53  
54  
55  
56  
57  
58  
59  
60
- 1 Nicol J, Tiedemann M. Bill C-14: An Act to amend the Criminal Code and to make related amendments to other Acts (medical assistance in dying). Ottawa: Library of Parliament; 2018. Report No.: 42-1-C14-E.
- 2 Orentlicher D, Pope TM, Rich BA, Physician Aid-in-Dying Clinical Criteria Committee. Clinical criteria for physician aid in dying. *Journal of Palliative Medicine*. 2016;19(3):259-62.
- 3 Wiebe E, Shaw J, Green S, Trouton K, Kelly M. Reasons for requesting medical assistance in dying. *Canadian Family Physician*. 2018;64(9):674-9.
- 4 Li M, Watt S, Escaf M, Gardam M, Heesters A, O'Leary G, Rodin G. Medical assistance in dying—implementing a hospital-based program in Canada. *N Engl J Med*. 2017;376(21):2082-8.
- 5 Rosso AE, Huyer D, Walker A. Analysis of the medical assistance in dying cases in Ontario: understanding the patient demographics of case uptake in Ontario since the Royal Assent and amendments of Bill C-14 in Canada. *Academic Forensic Pathology*. 2017;7(2):263-87.
- 6 Health Canada. Second interim report on medical assistance in dying in Canada. Ottawa: Health Canada; 2017. Report No.: 170252.
- 7 Health Canada. Third interim report on medical assistance in dying in Canada. Ottawa: Health Canada; 2018. Report No.: 180006.
- 8 Buchman S, Rozmovits L, Glazier RH. Equity and practice issues in colorectal cancer screening: Mixed-methods study. *Can Fam Physician*. 2016;62(4):e186-93.
- 9 Jonsen AR. A short history of medical ethics. New York: Oxford University Press; 2000.
- 10 Hart JT. The inverse care law. *The Lancet*. 1971;297(7696):405-12.
- 11 Williamson DL, Stewart MJ, Hayward K, Letourneau N, Makwarimba E, Masuda J, Raine K, Reutter L, Rootman I, Wilson D. Low-income Canadians' experiences with health-related services: implications for health care reform. *Health Policy*. 2006;76(1):106-21.
- 12 Casalino LP. Professionalism and caring for Medicaid patients—the 5% commitment?. *N Engl J Med*. 2013;369(19):1775-7.
- 13 Bump J, Cashin C, Chalkidou K, Evans D, González-Pier E, Guo Y, Holtz J, Htay DT, Levin C, Marten R, Mensah S. Implementing pro-poor universal health coverage. *The Lancet Global Health*. 2016;4(1):e14-6.
- 14 Isaacs SL, Schroeder SA. Class--the ignored determinant of the nation's health. *N Engl J Med*. 2004;351(11):1137-1142.

- 1  
2  
3  
4 15 Bor J, Cohen GH, Galea S. Population health in an era of rising income inequality: USA,  
5 1980–2015. *The Lancet*. 2017;389(10077):1475-90.  
6  
7 16 Redelmeier DA, Rozin P, Kahneman D. Understanding patients' decisions. Cognitive and  
8 emotional perspectives. *JAMA*. 1993;270(1):72-6.  
9  
10 17 Shafir E. [ed]. *The behavioral foundations of public policy*. Princeton, New Jersey:  
11 Princeton University Press, 2013.  
12  
13 18 Mani A, Mullainathan S, Shafir E, Zhao J. Poverty impedes cognitive function. *Science*  
14 2013;341(6149):976-80.  
15  
16 19 Tesarz J, Eich W, Treede RD, Gerhardt A. Altered pressure pain thresholds and increased  
17 wind-up in adult patients with chronic back pain with a history of childhood maltreatment:  
18 a quantitative sensory testing study. *Pain*. 2016;157(8):1799-809.  
19  
20 20 Gerber MM, Frankfurt SB, Contractor AA, Oudshoorn K, Dranger P, Brown LA. Influence of  
21 multiple traumatic event types on mental health outcomes: does count matter? *J*  
22 *Psychopath Behav Assess* 2018;40:645-54.  
23  
24 21 Stebbins J. The Law of Diminishing Returns. *Science*. 1944;99(2571):267-71.  
25  
26 22 Hoffman KM, Trawalter S. Assumptions about life hardship and pain perception. *Group*  
27 *Processes & Intergroup Relations*. 2016;19:493-508.  
28  
29 23 Molassiotis A, Lee PH, Burke TA, Dicato M, Gascon P, Roila F, Aapro M. Anticipatory  
30 nausea, risk factors, and its impact on chemotherapy-induced nausea and vomiting: results  
31 from the Pan European Emesis Registry study. *Journal of Pain and Symptom Management*.  
32 2016;51(6):987-93.  
33  
34 24 Kahneman D, Tversky A. Prospect theory: an analysis of decision under risk.  
35 *Econometrica* 1979;47:263-92.  
36  
37 25 Mullainathan S, Shafir E. *Scarcity: The new science of having less and how it defines our*  
38 *lives*. New York: Picador; 2014.  
39  
40 26 Attaran A. Unanimity on death with dignity—legalizing physician-assisted dying in  
41 Canada. *N Engl J Med*. 2015;372(22):2080-2.  
42  
43 27 Ipsos Reid. *Eight in Ten Canadians Support Advance Consent to Physician-Assisted*  
44 *Dying*. Toronto: Ipsos Reid; 2016. Available from: [https://www.ipsos.com/en-ca/news-](https://www.ipsos.com/en-ca/news-polls/eight-ten-80-canadians-support-advance-consent-physician-assisted-dying)  
45 [polls/eight-ten-80-canadians-support-advance-consent-physician-assisted-dying](https://www.ipsos.com/en-ca/news-polls/eight-ten-80-canadians-support-advance-consent-physician-assisted-dying)  
46  
47 28 Chochinov HM, Frazee C. Finding a balance: Canada's law on medical assistance in dying.  
48 *The Lancet*. 2016;388(10044):543-5.  
49  
50  
51  
52  
53  
54  
55  
56  
57  
58  
59  
60

- 1  
2  
3 29 Ministry of Health and Long Term Care Strategic Policy Branch. Medical Assistance in  
4 Dying. Ontario: Ministry of Health and Long Term Care; 2016. Available from:  
5 <http://www.health.gov.on.ca/en/pro/programs/ohip/bulletins/4000/bul4670.pdf>  
6
- 7 30 Ministry of Health and Long Term Care & Ontario Medical Association. OHIP payment for  
8 medical assistance in dying. Ontario: Ministry of Health and Long Term Care; 2018.  
9 Available from: [https://www.oma.org/wp-content/uploads/MAID\\_Billing-Guide-final-](https://www.oma.org/wp-content/uploads/MAID_Billing-Guide-final-18Oct2018.pdf)  
10 [18Oct2018.pdf](https://www.oma.org/wp-content/uploads/MAID_Billing-Guide-final-18Oct2018.pdf)  
11
- 12  
13 31 Statistics Canada. Canada at a Glance 2010 - Population [Internet]. 2010 [cited 2019 Mar  
14 17]. Available from: [https://www150.statcan.gc.ca/n1/pub/12-581-x/2010000/pop-](https://www150.statcan.gc.ca/n1/pub/12-581-x/2010000/pop-eng.htm)  
15 [eng.htm](https://www150.statcan.gc.ca/n1/pub/12-581-x/2010000/pop-eng.htm)  
16
- 17 32 About Ontario [Internet]. Government of Ontario. 2019 [cited 2019 Mar 17]. Available  
18 from: <https://www.ontario.ca/page/about-ontario>  
19  
20
- 21 33 Institute for Clinical Evaluative Sciences. Data dictionary: library. Toronto, Ontario:  
22 Institute for Clinical Evaluative Sciences. Available from:  
23 <https://datadictionary.ices.on.ca/Applications/DataDictionary/Default.aspx>. Accessed  
24 2019 Feb 11.  
25  
26
- 27 34 Iron K, Manuel DG. Quality assessment of administrative data (QuAAD): an opportunity  
28 for enhancing Ontario's health data. Toronto, Ontario: Institute for Clinical Evaluative  
29 Sciences (ICES), 2007.  
30
- 31 35 Iron K, Zagorski B, Sykora K. Living and dying in Ontario: An opportunity for improved  
32 health information—ICES investigative report. Toronto, Ontario: Institute for Clinical  
33 Evaluative Sciences (ICES), 2008.  
34  
35
- 36 36 Institute for Clinical Evaluative Sciences. Working with ICES data. Toronto, Ontario:  
37 Institute for Clinical Evaluative Sciences (ICES) Available from: [www.ices.on.ca/Data-and-](http://www.ices.on.ca/Data-and-Privacy/ICES-data/Working-with-ICES-Data)  
38 [Privacy/ICES-data/Working-with-ICES-Data](http://www.ices.on.ca/Data-and-Privacy/ICES-data/Working-with-ICES-Data). Accessed 2019 Feb 11.  
39  
40
- 41 37 Ministry of Health and Long Term Care. Schedule of Benefits. Ontario: Ministry of Health  
42 and Long Term Care; 2015.  
43  
44
- 45 38 Ministry of Health and Long Term Care. Ontario Drug Benefit Formulary/Comparative  
46 Drug Index. Ontario: Ministry of Health and Long Term Care; 2018.  
47
- 48 39 Love R, Wolfson MC, Statistics Canada- Consumer Income and Expenditure Division.  
49 Income Inequality: Statistical Methodology and Canadian Illustrations. Ottawa: Statistics  
50 Canada. 1976.  
51  
52
- 53 40 Alter DA, Naylor CD, Austin P, Tu JV. Effects of socioeconomic status on access to invasive  
54 cardiac procedures and on mortality after acute myocardial infarction. *New England*  
55 *Journal of Medicine*. 1999;341(18):1359-67.  
56  
57  
58  
59

- 1  
2  
3 41 Finkelstein MM. Ecologic proxies for household income: how well do they work for the  
4 analysis of health and health care utilization? *Can J Public Health*. 2004;95(2):90-4.  
5
- 6 42 Krieger N. Overcoming the absence of socioeconomic data in medical records: validation  
7 and application of a census-based methodology. *American Journal of Public Health*.  
8 1992;82(5):703-10.  
9
- 10 43 Mustard CA, Derksen S, Berthelot JM, Wolfson M. Assessing ecologic proxies for  
11 household income: a comparison of household and neighbourhood level income measures  
12 in the study of population health status. *Health&Place*. 1999;5(2):157-71.  
13
- 14 44 Glazier RH, Creatore MI, Agha MM, Steele LS, Hwang S, Rhodes A, Steele L, Badgley R,  
15 Clark J, Cohen MM, Badley EM. Socioeconomic misclassification in Ontario's health care  
16 registry. *Canadian Journal of Public Health*. 2003;94(2):140-3.  
17
- 18 45 Statistics Canada (2006). Income and earnings reference guide, 2006 census. Catalogue  
19 no. 97-563-GWE2006003. Available at: [http://www12.statcan.gc.ca/census-  
20 recensement/2006/ref/rp-guides/income-revenu-eng.cfm](http://www12.statcan.gc.ca/census-recensement/2006/ref/rp-guides/income-revenu-eng.cfm).  
21  
22
- 23 46 Statistics Canada. 2006 Census Dictionary. Available at: [www.statcan.gc.ca](http://www.statcan.gc.ca).  
24  
25  
26  
27
- 28 47 Pampalon R, Hamel D, Gamache P. A comparison of individual and area-based socio-  
29 economic data for monitoring social inequalities in health. *Health Reports*. 2009;20(4):85.  
30
- 31 48 Government of Ontario. Registered Persons Database [Internet]. Ontario: Government of  
32 Ontario; 2017 [cited 2019]. Available from: [https://www.ontario.ca/data/registered-  
33 persons-database-rpdb](https://www.ontario.ca/data/registered-persons-database-rpdb)  
34  
35
- 36 49 Goel V, Williams JI, Anderson GM, Blackstein-Hirsch P, Fooks C, Naylor CD. Patterns of  
37 health care in Ontario - The ICES practice atlas. Ontario: ICES; 1996.  
38  
39
- 40 50 Jaakkimainen L, Upshur R, Klein-Geltink JE, Leong A, Maaten S, Schultz SE, Wang L.  
41 Primary care in Ontario: ICES atlas. Toronto: Institute for Clinical Evaluative Sciences,  
42 2006.  
43
- 44 51 Sibley LM, Moineddin R, Agha MM, Glazier RH. Risk adjustment using administrative  
45 data-based and survey-derived methods for explaining physician utilization. *Med Care*.  
46 2010;48(2):175-82.  
47  
48
- 49 52 Austin PC, van Walraven C, Wodchis WP, Newman A, Anderson GM. Using the Johns  
50 Hopkins Aggregated Diagnosis Groups (ADGs) to predict mortality in a general adult  
51 population cohort in Ontario, Canada. *Med Care*. 2011;49(10):932-9.  
52  
53
- 54 53 Guilcher SJ, Bronskill SE, Guan J, Wodchis WP. Who Are the High-Cost Users? A Method  
55 for Person-Centred Attribution of Health Care Spending. *PLoS One*. 2016 Mar  
56 3;11(3):e0149179.  
57  
58



- 1  
2  
3 54 Wodchis WP, Austin PC, Henry DA. A 3-year study of high-cost users of health care. *CMAJ*.  
4 2016;188(3):182-188.  
5
- 6 55 Tu K, Campbell NR, Chen ZL, Cauch-Dudek KJ, McAlister FA. Accuracy of administrative  
7 databases in identifying patients with hypertension. *Open Medicine*. 2007;1(1):e18.  
8
- 9 56 Gandhi S, Chiu M, Lam K, Cairney JC, Guttman A, Kurdyak P. Mental health service use  
10 among children and youth in Ontario: Population-based trends over time. *Canadian Journal*  
11 *of Psychiatry*. 2016;61(2):119-24.  
12  
13
- 14 57 Levy AR, O'Brien BJ, Sellors C, Grootendorst P, Willison D. Coding accuracy of  
15 administrative drug claims in the Ontario Drug Benefit database. *Can J Clin Pharmacol*.  
16 2003;10(2):67-71.  
17  
18
- 19 58 Redelmeier DA, Tibshirani RJ. Methods for analyzing matched designs with double  
20 controls: excess risk is easily estimated and misinterpreted when evaluating traffic deaths.  
21 *J Clin Epidemiol*. 2018;98:117-122.  
22  
23
- 24 59 Breslow NE, Day NE. *Analysis of case-control studies*. Lyon, France: International  
25 Agency for Research on Cancer; 1980.  
26
- 27 60 Wacholder S, Weinberg CR. Paired versus two-sample design for a clinical trial of  
28 treatments with dichotomous outcome: Power considerations. *Biometrics*.  
29 1982;38(3):801-12.  
30  
31
- 32 61 Cheek NN, Shafir E. The thick skin heuristic in judgments of distress about people in  
33 poverty. *Behavioural Public Policy* (in press).  
34
- 35 62 Krueger AB, Stone AA. Psychology and economics. Progress in measuring subjective well-  
36 being. *Science*. 2014;346(6205):42-3.  
37  
38
- 39 63 Selby D, Bean S, Isenberg-Grzeda E, Bioethics BHD, Nolen A. Medical assistance in dying  
40 (MAiD): A descriptive study from a Canadian tertiary care hospital. *Am J Hosp Palliat Care*.  
41 2019. [Epub ahead of print]  
42  
43
- 44 64 Ayers I. Fair driving: gender and race discrimination in retail car negotiations. *Harvard*  
45 *Law Review* 1991;104:817-72.  
46
- 47 65 Redelmeier DA, Cialdini RB. Problems for clinical judgement: 5. Principles of influence in  
48 medical practice. *CMAJ*. 2002;166(13):1680-4.  
49  
50
- 51 66 Redelmeier DA, Dickinson VM. Determining whether a patient is feeling better: pitfalls  
52 from the science of human perception. *J Gen Intern Med*. 2011;26(8):900-6.  
53  
54
- 55 67 Redelmeier DA, Dickinson VM. Judging whether a patient is actually improving: more  
56 pitfalls from the science of human perception. *J Gen Intern Med*. 2012;27(9):1195-9.  
57  
58

- 1  
2  
3 68 Ho TH, Barbera L, Saskin R, Lu H, Neville BA, Earle CC. Trends in the aggressiveness of  
4 end-of-life cancer care in the universal health care system of Ontario, Canada. *Journal of*  
5 *Clinical Oncology*. 2011;29(12):1587-91.  
6  
7 69 Tjepkema M, Wilkins R, Long A. Cause-specific mortality by income adequacy in Canada:  
8 A 16-year follow-up study. *Health Rep*. 2013;24(7):14-22.  
9  
10 70 Prokopetz JJ, Lehmann LS. Redefining physicians' role in assisted dying. *N Engl J Med*.  
11 2012;367(2):97-9.  
12  
13 71 Boudreau JD, Somerville MA, Biller-Andorno N. Clinical decisions. Physician-assisted  
14 suicide. *N Engl J Med*. 2013;368(15):1450-2.  
15  
16 72 Battin MP, van der Heide A, Ganzini L, van der Wal G, Onwuteaka-Philipsen BD. Legal  
17 physician-assisted dying in Oregon and the Netherlands: evidence concerning the impact  
18 on patients in "vulnerable" groups. *J Med Ethics*. 2007;33(10):591-7.  
19  
20 73 Steck N, Junker C, Zwahlen M; Swiss National Cohort. Increase in assisted suicide in  
21 Switzerland: did the socioeconomic predictors change? Results from the Swiss National  
22 Cohort. *BMJ Open*. 2018;8(4):e020992.  
23  
24 74 Steck N, Junker C, Maessen M, Reisch T, Zwahlen M, Egger M, Swiss National Cohort.  
25 Suicide assisted by right-to-die associations: a population based cohort study. *International*  
26 *Journal of Epidemiology*. 2014;43(2):614-22.  
27  
28 75 Dierickx S, Deliens L, Cohen J, Chambaere K. Comparison of the expression and granting  
29 of requests for euthanasia in Belgium in 2007 vs 2013. *JAMA Internal Medicine*.  
30 2015;175(10):1703-6.  
31  
32 76 Sulmasy LS, Mueller PS. Ethics and the legalization of physician-assisted suicide: an  
33 American College of Physicians position paper. *Annals of Internal Medicine*.  
34 2017;167(8):576-8.  
35  
36 77 Redelmeier DA, Detsky AS. Economic theory and medical assistance in dying. *Appl*  
37 *Health Econ Health Policy*. 2020. doi: 10.1007/s40258-020-00587-4.  
38  
39 78 Verlinde E, De Laender N, De Maesschalck S, Deveugele M, Willems S. The social gradient  
40 in doctor-patient communication. *International Journal for Equity in Health*. 2012;11(1):1-  
41 14.  
42  
43 79 Wright AC, Shaw JC. The spectrum of end of life care: an argument for access to medical  
44 assistance in dying for vulnerable populations. *Medicine, Health Care and Philosophy*.  
45 2019;22(2):211-9.  
46  
47 80 Voeuk A, Nikolaichuk C, Fainsinger R, Huot A. Continuous palliative sedation for  
48 existential distress? A survey of Canadian palliative care physicians' views. *J Palliat Care*.  
49 2017;32(1):26-33.  
50  
51  
52  
53  
54  
55  
56  
57  
58  
59  
60

1  
2  
3 81 Lo B. Beyond legalization — dilemmas physicians confront regarding aid in dying. *N Engl J Med*. 2018;378(22):2060-2.  
4

5  
6 82 Rao JK, Anderson LA, Lin FC, Laux JP. Completion of advance directives among US  
7 consumers. *American Journal of Preventive Medicine*. 2014;46(1):65-70.  
8

9  
10 83 McDonald JC, Du Manoir JM, Kevork N, Le LW, Zimmermann C. Advance directives in  
11 patients with advanced cancer receiving active treatment: attitudes, prevalence, and  
12 barriers. *Supportive Care in Cancer*. 2017;25(2):523-31.  
13

14 84 Selby D, Bean S. Oncologists communicating with patients about assisted dying. *Curr  
15 Opin Support Palliat Care*. 2019;13(1):59-63.  
16

17 85 Boudreau JD, Somerville MA, Biller-Andorno N. Clinical decisions. Physician-assisted  
18 suicide. *N Engl J Med*. 2013;368(15):1450-2.  
19

20 86 Colbert JA, Schulte J, Adler JN. Physician-assisted suicide—polling results. *N Engl J Med*.  
21 2013;369(11):e15.  
22

23 87 Miller FG, Appelbaum PS. Physician-Assisted Death for Psychiatric Patients - Misguided  
24 Public Policy. *N Engl J Med*. 2018;378(10):883-885.  
25

26 88 Hoffman KH, Trawalter S. Assumptions about life hardship and pain perception. *Group  
27 Processes & Intergroup Relations* 2016;19(4):493-508.  
28

29 89 Hoffman KM, Trawalter S, Axt JR, Oliver MN. Racial bias in pain assessment and  
30 treatment recommendations, and false beliefs about biological differences between blacks  
31 and whites. *Proceedings of the National Academy of Sciences*. 2016;113(16):4296-301.  
32

33 90 Cheek NN, Shafir E. The thick skin heuristic in judgments of distress about people in  
34 poverty. *Behavioural Public Policy* (in press).  
35

36 91 Tversky A, Kahneman D. Judgment under uncertainty: heuristics and biases. *Science*.  
37 1974;185(4157):1124-31.  
38

39 92 Kahneman D, Knetsch JL, Thaler RH. Experimental tests of the endowment effect and the  
40 Coase theorem. *Journal of Political Economy*. 1990;98(6):1325-48.  
41

42 93 Kahneman D, Knetsch JL, Thaler RH. Anomalies: The endowment effect, loss aversion,  
43 and status quo bias. *Journal of Economic Perspectives*. 1991;5(1):193-206.  
44

45 94 Mani A, Mullainathan S, Shafir E, Zhao J. Poverty impedes cognitive function. *Science*  
46 2013;341(6149):976-80.  
47

48 95 Wamala S, Merlo J, Boström G, Hogstedt C. Perceived discrimination, socioeconomic  
49 disadvantage and refraining from seeking medical treatment in Sweden. *J Epidemiol  
50 Community Health*. 2007;61(5):409-15.  
51  
52  
53  
54  
55  
56  
57  
58

- 1  
2  
3 96 Hausmann LR, Hannon MJ, Kresevic DM, Hanusa BH, Kwoh CK, Ibrahim SA. Impact of  
4 perceived discrimination in healthcare on patient-provider communication. *Med Care*.  
5 2011;49(7):626-33.  
6  
7 97 Hoffman KH, Trawalter S. Assumptions about life hardship and pain perception. *Group*  
8 *Processes & Intergroup Relations* 2016;19(4):493-508.  
9  
10 98 Walker AE, Becker NG. Health inequalities across socio-economic groups: comparing  
11 geographic-area-based and individual-based indicators. *Public Health*. 2005;119(12):1097-  
12 104.  
13  
14 99 Yarnell CJ, Fu L, Manuel D, Tanuseputro P, Stukel T, Pinto R, Scales DC, Laupacis A, Fowler  
15 RA. Association between immigrant status and end-of-life care in Ontario, Canada. *JAMA*.  
16 2017;318(15):1479-1488.  
17  
18 100 Rubens M, Ramamoorthy V, Saxena A, Das S, Appunni S, Rana S, Puebla B, Suarez DT,  
19 Khawand-Azoulai M, Medina S, Viamonte-Ros A. Palliative Care Consultation Trends Among  
20 Hospitalized Patients With Advanced Cancer in the United States, 2005 to 2014. *Am J Hosp*  
21 *Palliat Care*. 2019;36(4):294-301.  
22  
23 101 Dees MK, Vernooij-Dassen MJ, Dekkers WJ, Vissers KC, Van Weel C. 'Unbearable  
24 suffering': a qualitative study on the perspectives of patients who request assistance in  
25 dying. *Journal of Medical Ethics*. 2011;37(12):727-34.  
26  
27 102 Periyakoil VS, Neri E, Kraemer H. Patient-reported barriers to high-quality, end-of-life  
28 care: A multiethnic, multilingual, mixed-methods study. *Journal of Palliative Medicine*.  
29 2016;19(4):373-9.  
30  
31 103 Shafir E. *The behavioral foundations of policy*. Princeton, New Jersey: Princeton  
32 University Press, 2013.  
33  
34 104 Yang YT, Curlin FA. Why physicians should oppose assisted suicide. *JAMA*.  
35 2016;315(3):247-8.  
36  
37 105 Lerner BH, Caplan AL. Euthanasia in Belgium and the Netherlands: on a slippery slope?  
38 *JAMA Internal Medicine*. 2015;175(10):1640-1.  
39  
40 106 Noble B. Legalising assisted dying puts vulnerable patients at risk and doctors must  
41 speak up. *BMJ Support Palliat Care*. 2013;3(3):298-9.  
42  
43 107 Hadro M. How assisted suicide discriminates against the poor and disabled. *Catholic*  
44 *News Agency*. February 28, 2017.  
45 Available from: [https://www.catholicnewsagency.com/news/how-assisted-suicide-](https://www.catholicnewsagency.com/news/how-assisted-suicide-discriminates-against-the-poor-and-disabled-57444)  
46 [discriminates-against-the-poor-and-disabled-57444](https://www.catholicnewsagency.com/news/how-assisted-suicide-discriminates-against-the-poor-and-disabled-57444)  
47  
48 108 Vivas L, Bastien P. Expanding MAiD criteria could irreversibly harm the most  
49 vulnerable. *Health Debate*. January 17, 2020. Available from:  
50 <https://healthydebate.ca/opinions/maid-harm-vulnerable-response>  
51  
52  
53  
54  
55  
56  
57  
58  
59

# Figure 1. Frequency of Medical Assistance in Dying

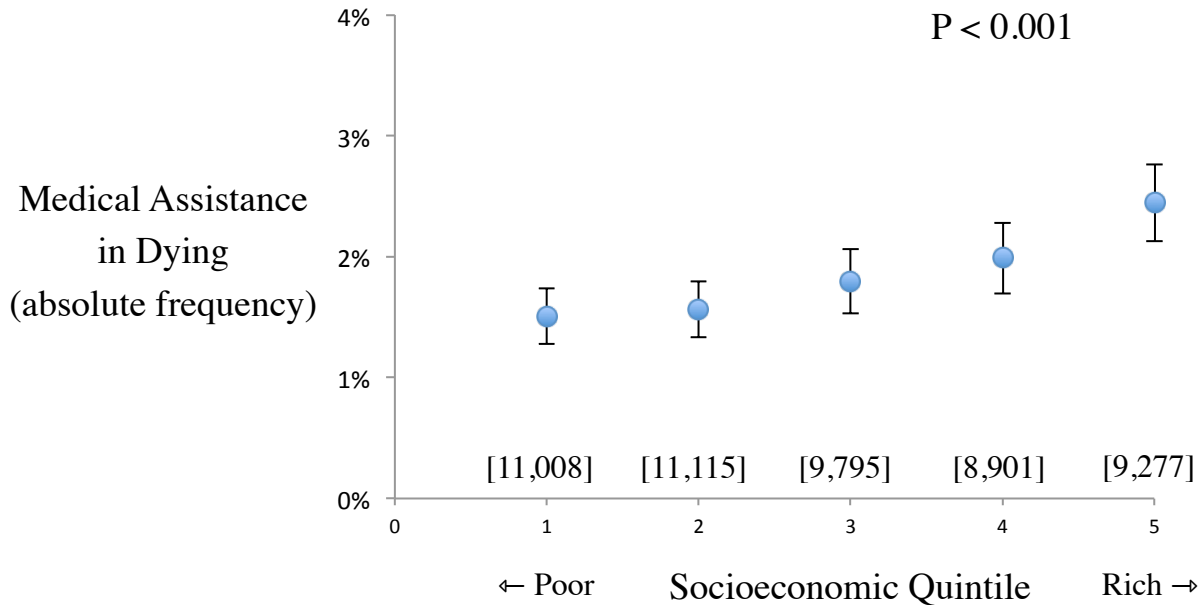

## Footnotes

Plot shows frequency of receiving medical assistance in dying for patients receiving palliative care who have different socioeconomic status. X-axis denotes quintiles of socioeconomic status spanning from lowest to highest. Y-axis denotes frequency of receiving medical assistance in dying. Solid circles indicate estimate and vertical bars indicate 95% confidence interval. Square brackets denote total patients in each analysis. P-value indicates trend. Results suggest gradient where patients with lowest socioeconomic status are less likely to receive medical assistance in dying than patients with highest socioeconomic status.

# Figure 2. Consistent Reductions across Subgroups

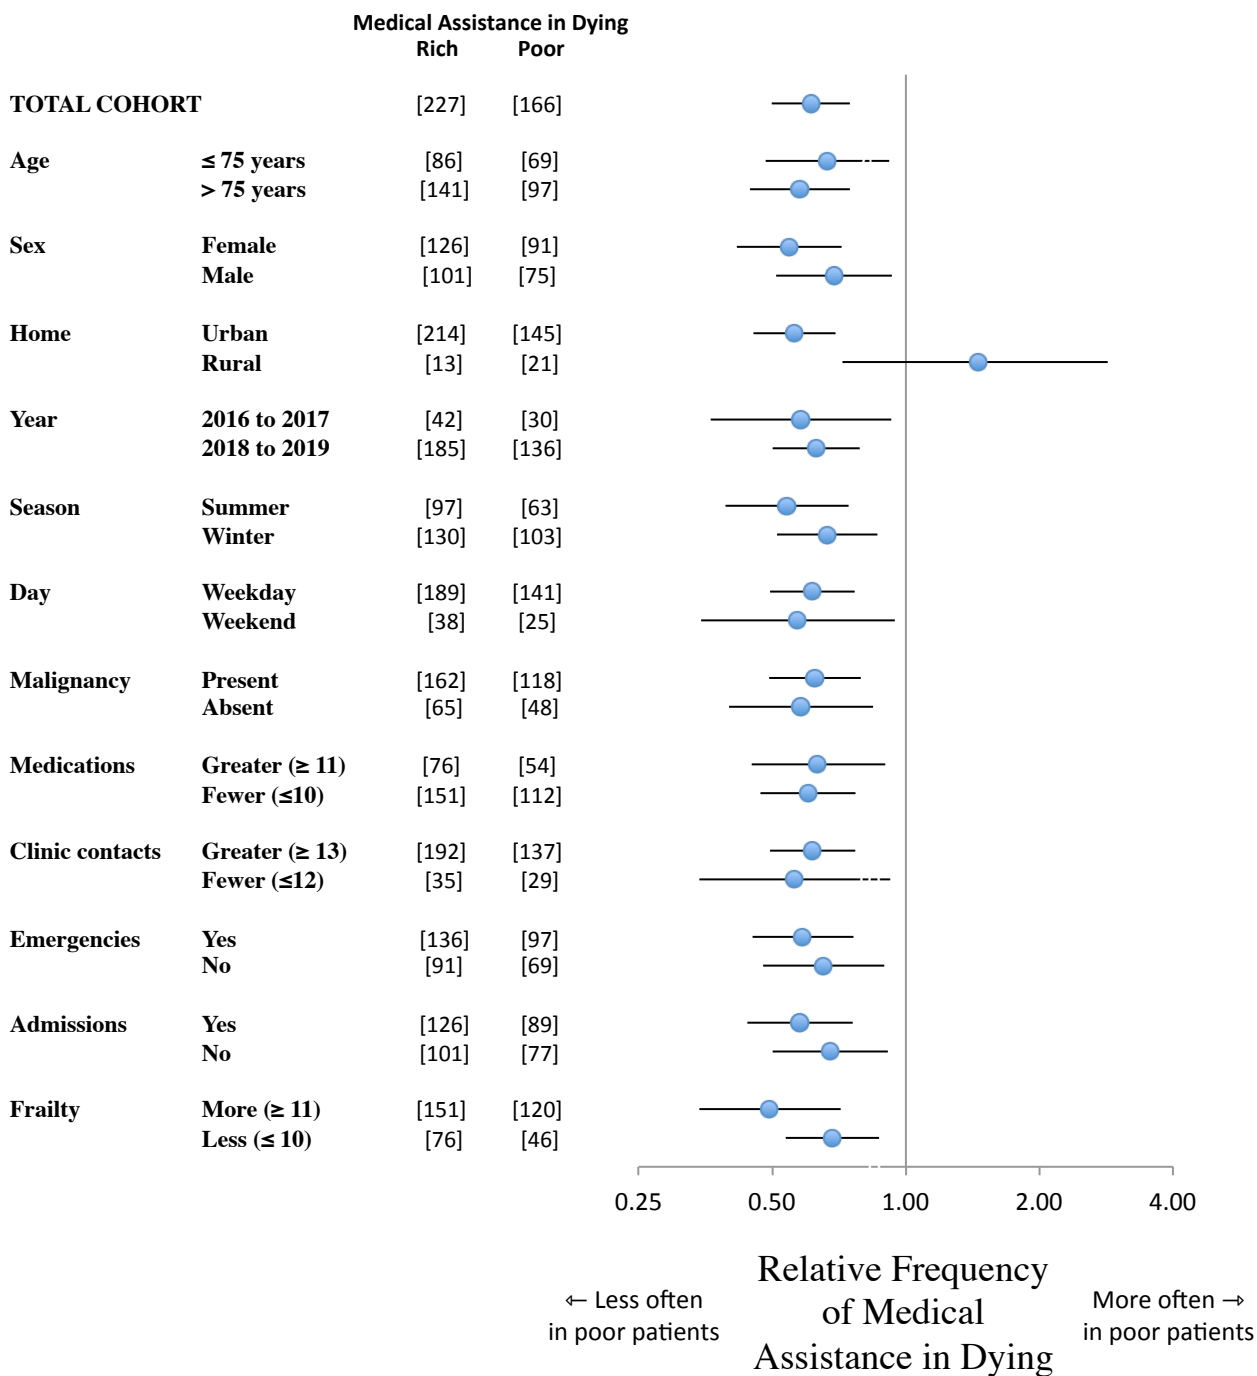

### Footnotes

Forest plot of relative frequency of receiving medical assistance in dying in different subgroups. Each analysis compares patients in lowest socioeconomic quintile to those in highest socioeconomic quintile. Circles denote estimate and horizontal lines denote 95% confidence interval. Vertical line shows perfect equity. Square brackets show count of patients in each subgroup. Summary analysis for total cohort shown at top. Findings show generally reduced frequency of medical assistance in dying for patients with low socioeconomic status (exception subgroup of rural home location attributable to chance).

## Figure 3. Perceptions of Patient Suffering

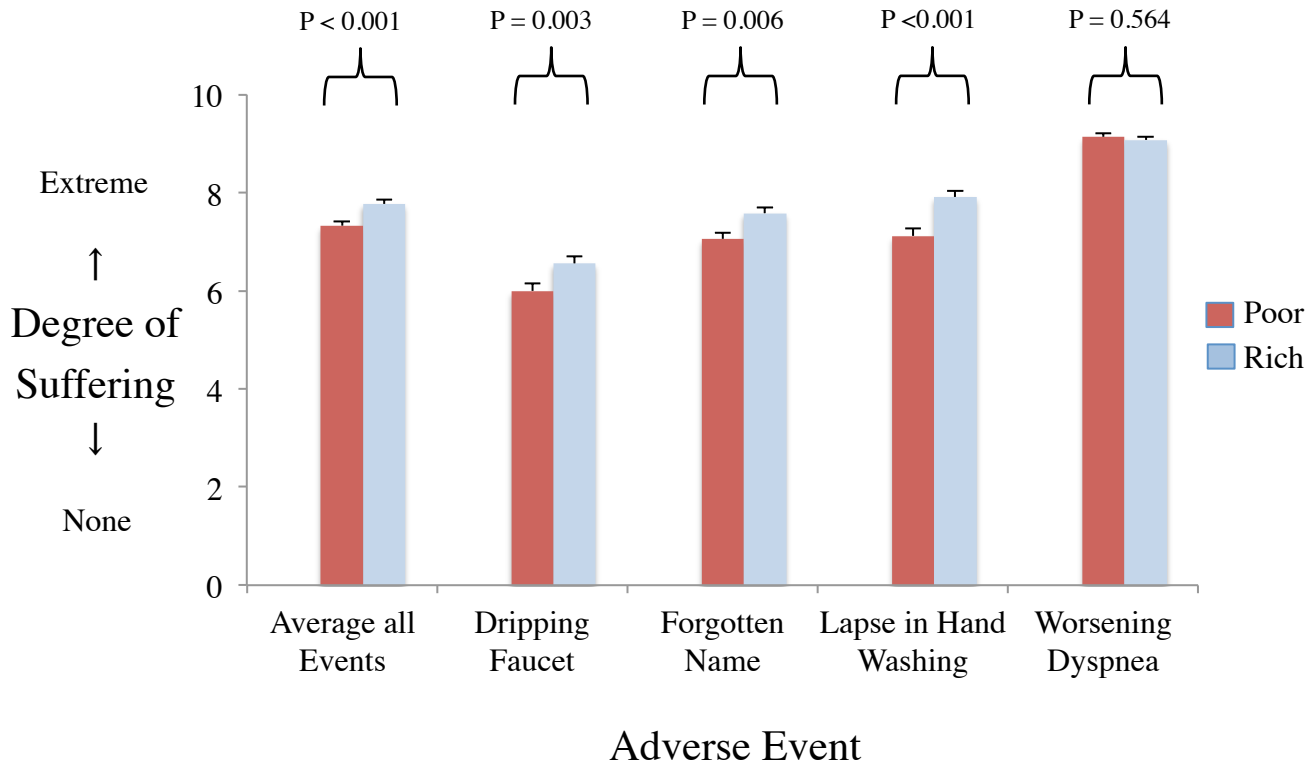

### Footnotes

Plot shows mean ratings of patient suffering from survey of clinicians ( $n = 494$ ). X-axis denotes average of all adverse events and each specific component (dripping faucet making noise, forgetting patient name despite being in hospital for days, failures of hand washing when entering room, and worsening dyspnea). Y-axis denotes mean ratings of patient suffering. Red bars for survey describing a poor patient. Blue bars for survey describing a rich patient. Vertical beams denote standard errors. P-values compare mean ratings of same adverse event. Results show significantly lower mean ratings of suffering in the poor version than rich version (exception of dyspnea).

# Appendix §1. Wording of Different Survey Versions

## Rich Version

## Poor Version

### END OF LIFE SUFFERING

Mr. FR is a 75-year-old man. He is rich, has led a life of comfort, and knows real luxury. He is admitted for a hip fracture that is newly-diagnosed as metastatic pancreatic cancer. He declines surgery and, instead, is thinking of Medical Assistance in Dying. He believes this is a grievous situation where suffering and death are foreseeable. Rate the following 4 events for their potential impact on his symptoms. (Circle one for each)

#1: FR notices the nurses never remember his name even though he has been in hospital for days. How much worse do you think this makes him feel?

0----1----2----3----4----5----6----7----8----9----10  
No Suffering Extreme Suffering

#2: FR has a bathroom sink in his room, but the faucet is leaky and constantly making a dripping noise. How much worse do you think this makes him feel?

0----1----2----3----4----5----6----7----8----9----10  
No Suffering Extreme Suffering

#3: FR has a large surgery team and often sees them fail to wash their hands when entering his room. How much worse do you think this makes him feel?

0----1----2----3----4----5----6----7----8----9----10  
No Suffering Extreme Suffering

#4: FR has worsening dyspnea and can no longer enjoy talking by phone with his granddaughter. How much worse do you think this makes him feel?

0----1----2----3----4----5----6----7----8----9----10  
No Suffering Extreme Suffering

### END OF LIFE SUFFERING

Mr. FR is a 75-year-old man. He is poor, has led a life of troubles, and knows real hardship. He is admitted for a hip fracture that is newly-diagnosed as metastatic pancreatic cancer. He declines surgery and, instead, is thinking of Medical Assistance in Dying. He believes this is a grievous situation where suffering and death are foreseeable. Rate the following 4 events for their potential impact on his symptoms. (Circle one for each)

#1: FR notices the nurses never remember his name even though he has been in hospital for days. How much worse do you think this makes him feel?

0----1----2----3----4----5----6----7----8----9----10  
No Suffering Extreme Suffering

#2: FR has a bathroom sink in his room, but the faucet is leaky and constantly making a dripping noise. How much worse do you think this makes him feel?

0----1----2----3----4----5----6----7----8----9----10  
No Suffering Extreme Suffering

#3: FR has a large surgery team and often sees them fail to wash their hands when entering his room. How much worse do you think this makes him feel?

0----1----2----3----4----5----6----7----8----9----10  
No Suffering Extreme Suffering

#4: FR has worsening dyspnea and can no longer enjoy talking by phone with his granddaughter. How much worse do you think this makes him feel?

0----1----2----3----4----5----6----7----8----9----10  
No Suffering Extreme Suffering

## Footnotes

Textbox showing exact wording of survey study. Rich version on left and poor version on right. Each respondent received single version by randomized assignment. Sole difference between the two versions appears in second sentence describing either wealth or poverty. Assignment based on survey randomized in advance and allocated in blinded manner (face-down orientation). Consent rate of approximately 70% (refusals not tracked). Completion rate of 100% (no faulty or incomplete responses). Time for survey completion about 1 minute.



## Appendix §2. Prior Diagnoses

|                                                   | Medical Assistance in Dying (n = 920) | Palliative Care Patients (n = 49,176) |
|---------------------------------------------------|---------------------------------------|---------------------------------------|
| <b>Malignancy Diagnosis</b>                       |                                       |                                       |
| Mouth, ear, nose, throat                          | 24 (3)                                | 1,699 (3)                             |
| Digestive tract                                   | 239 (26)                              | 12,327 (25)                           |
| Respiratory tract                                 | 205 (22)                              | 11,317 (23)                           |
| Muskuloskeletal, skin, breast                     | 151 (16)                              | 8,387 (17)                            |
| Genitourinary tract                               | 174 (19)                              | 9,065 (18)                            |
| Neurologic tract                                  | 62 (7)                                | 3,177 (6)                             |
| Miscellaneous                                     | 360 (39)                              | 21,058 (43)                           |
| Hematologic                                       | 58 (6)                                | 4,498 (9)                             |
| <b>Non-Malignancy Diagnosis</b>                   |                                       |                                       |
| Parkinson's disease or other CNS illness          | 158 (17)                              | 6,388 (13)                            |
| Stroke or other CNS vascular event                | 76 (8)                                | 7,243 (15)                            |
| Concussion or other CNS trauma                    | 64 (7)                                | 1,327 (3)                             |
| Myasthenia gravis or other myo-neuropathy         | 189 (21)                              | 15,332 (31)                           |
| Congestive heart failure or other cardiac illness | 332 (36)                              | 22,836 (46)                           |
| Pulmonary fibrosis or other lung illness          | 351 (38)                              | 22,684 (46)                           |
| Cirrhosis or other liver failure                  | 50 (5)                                | 3,533 (7)                             |
| Uremia or other kidney failure                    | 77 (8)                                | 9,214 (19)                            |
| <b>Active Comorbidity</b>                         |                                       |                                       |
| Hypertension                                      | 169 (18)                              | 12,050 (25)                           |
| Acid reflux                                       | 101 (11)                              | 6,333 (13)                            |
| Diabetes                                          | 99 (11)                               | 10,994 (22)                           |
| Anemia                                            | 86 (9)                                | 8,083 (16)                            |
| Glaucoma                                          | 112 (12)                              | 4,381 (9)                             |
| Anxiety                                           | 209 (23)                              | 10,083 (21)                           |
| Depression                                        | 50 (5)                                | 2,075 (4)                             |

Footnotes

data are count (percentage) of each column

data sum to above 100% due to patients having more than 1 diagnosis

diagnoses based on ICD9 codes extracted from outpatient records in year before death

CNS denotes Central Nervous System

## Appendix §3. Prior Medications

|                                           | Medical Assistance<br>in Dying<br>(n = 920) | Palliative<br>Care<br>Patients<br>(n = 49,176) |
|-------------------------------------------|---------------------------------------------|------------------------------------------------|
| Specific Medication in Last Month of Life |                                             |                                                |
| Opioid                                    | 587 (64)                                    | 24,455 (50)                                    |
| Beta blocker                              | 119 (13)                                    | 8,247 (17)                                     |
| Calcium blocker                           | 71 (8)                                      | 5,222 (11)                                     |
| Acid suppressor                           | 284 (31)                                    | 14,679 (30)                                    |
| Diabetes medication                       | 30 (3)                                      | 3,866 (8)                                      |
| Statin                                    | 75 (8)                                      | 6,570 (13)                                     |
| Inhaled bronchodilator                    | 51 (6)                                      | 2,709 (6)                                      |
| Glaucoma medication                       | 34 (4)                                      | 1,472 (3)                                      |
| Benzodiazepine                            | 405 (44)                                    | 16,311 (33)                                    |
| Antidepressant                            | 225 (24)                                    | 10,841 (22)                                    |

Footnotes

data are count (percentage) of each column

data sum to above 100% due to patients having more than 1 medication

medications based on DIN codes extracted from outpatient records in month before death

# BMJ Open

## Association of Socioeconomic Status with Medical Assistance in Dying: A Case Control Analysis

|                                 |                                                                                                                                                                                                                                                                                                                                                                                                                                                               |
|---------------------------------|---------------------------------------------------------------------------------------------------------------------------------------------------------------------------------------------------------------------------------------------------------------------------------------------------------------------------------------------------------------------------------------------------------------------------------------------------------------|
| Journal:                        | <i>BMJ Open</i>                                                                                                                                                                                                                                                                                                                                                                                                                                               |
| Manuscript ID                   | bmjopen-2020-043547.R1                                                                                                                                                                                                                                                                                                                                                                                                                                        |
| Article Type:                   | Original research                                                                                                                                                                                                                                                                                                                                                                                                                                             |
| Date Submitted by the Author:   | 21-Jan-2021                                                                                                                                                                                                                                                                                                                                                                                                                                                   |
| Complete List of Authors:       | Redelmeier, Donald; University of Toronto Faculty of Medicine, Medicine; Sunnybrook Research Institute, Evaluative Clinical Sciences<br>Ng, Kelvin; University of Toronto; Sunnybrook Research Institute, Evaluative Clinical Sciences<br>Thiruchelvam, Deva; Institute for Clinical Evaluative Sciences; Sunnybrook Research Institute, Evaluative Clinical Sciences<br>Shafir, Eldar; Princeton University, Public Policy; Princeton University, Psychology |
| <b>Primary Subject Heading</b>: | Palliative care                                                                                                                                                                                                                                                                                                                                                                                                                                               |
| Secondary Subject Heading:      | Health services research                                                                                                                                                                                                                                                                                                                                                                                                                                      |
| Keywords:                       | Rationing < HEALTH SERVICES ADMINISTRATION & MANAGEMENT, Cancer pain < ONCOLOGY, Adult palliative care < PALLIATIVE CARE, PRIMARY CARE, Health policy < HEALTH SERVICES ADMINISTRATION & MANAGEMENT                                                                                                                                                                                                                                                           |
|                                 |                                                                                                                                                                                                                                                                                                                                                                                                                                                               |

SCHOLARONE™  
Manuscripts



I, the Submitting Author has the right to grant and does grant on behalf of all authors of the Work (as defined in the below author licence), an exclusive licence and/or a non-exclusive licence for contributions from authors who are: i) UK Crown employees; ii) where BMJ has agreed a CC-BY licence shall apply, and/or iii) in accordance with the terms applicable for US Federal Government officers or employees acting as part of their official duties; on a worldwide, perpetual, irrevocable, royalty-free basis to BMJ Publishing Group Ltd ("BMJ") its licensees and where the relevant Journal is co-owned by BMJ to the co-owners of the Journal, to publish the Work in this journal and any other BMJ products and to exploit all rights, as set out in our [licence](#).

The Submitting Author accepts and understands that any supply made under these terms is made by BMJ to the Submitting Author unless you are acting as an employee on behalf of your employer or a postgraduate student of an affiliated institution which is paying any applicable article publishing charge ("APC") for Open Access articles. Where the Submitting Author wishes to make the Work available on an Open Access basis (and intends to pay the relevant APC), the terms of reuse of such Open Access shall be governed by a Creative Commons licence – details of these licences and which [Creative Commons](#) licence will apply to this Work are set out in our licence referred to above.

Other than as permitted in any relevant BMJ Author's Self Archiving Policies, I confirm this Work has not been accepted for publication elsewhere, is not being considered for publication elsewhere and does not duplicate material already published. I confirm all authors consent to publication of this Work and authorise the granting of this licence.

1  
2  
3 Association of Socioeconomic Status with Medical Assistance in Dying:  
4  
5 A Case Control Analysis  
6  
7  
8  
9

10  
11 Donald A. Redelmeier, MD FRCPC MSHSR FACP [1, 2, 3, 4, 5]  
12

13 Kelvin Ng, BA [1, 2]  
14

15 Deva Thiruchelvam, MSc [2, 3]  
16

17 Eldar Shafir PhD [6, 7]  
18  
19  
20

21 [1] Department of Medicine, University of Toronto

22 [2] Evaluative Clinical Sciences Program, Sunnybrook Research Institute

23 [3] Institute for Clinical Evaluative Sciences

24 [4] Division of General Internal Medicine, Sunnybrook Health Sciences Centre

25 [5] Center for Leading Injury Prevention Practice Education & Research

26 [6] Department of Psychology, Princeton University

27 [7] Princeton School of Public and International Affairs  
28  
29  
30

31  
32 Correspondence: Donald A. Redelmeier

33 Sunnybrook Health Sciences Centre, G-151

34 2075 Bayview Ave,

35 Toronto, Ontario, CANADA M4N 3M5

36 voice: (416) 480-6999 fax: (416) 480-6048

37 e.mail: dar@ices.on.ca  
38  
39  
40

41 Running Title: Medical Assistance in Dying  
42  
43

44 Key Words: clinical reasoning; behavioral economics; compassionate care;  
45 assisted suicide; social inequities; patient empathy  
46  
47

48 Word Count: 2,759  
49  
50  
51  
52  
53  
54  
55  
56  
57  
58  
59  
60

## 1 ABSTRACT

2  
3  
4 Objectives: Economic constraints are a common explanation for why patients with low socioeconomic status tend to experience less  
5 access to medical care. We tested whether the decreased care extends to medical assistance in dying in a healthcare system with no  
6 direct economic constraints.  
7

8  
9 Design: Population-based case-control study of adults who died.  
10

11  
12 Setting: Ontario, Canada, between June 1, 2016 and June 1, 2019.  
13

14  
15 Patients: Patients receiving palliative care under universal insurance with no user fees.  
16

17  
18 Exposure: Patient's socioeconomic status identified using standardized quintiles.  
19

20  
21 Main Outcome Measure: Whether the patient received medical assistance in dying.  
22

23  
24 Results: A total of 50,096 palliative care patients died, of whom 920 received medical assistance in dying (cases) and 49,176  
25 did not receive medical assistance in dying (controls). Medical assistance in dying was less frequent for patients with low  
26 socioeconomic status (166 of 11,008 = 1.5%) than for patients with high socioeconomic status (227 of 9,277 = 2.4%).  
27 This equaled a 39% decreased odds of receiving medical assistance in dying associated with low socioeconomic status (odds ratio  
28 = 0.61, 95% confidence interval 0.50 to 0.75,  $p < 0.001$ ). The relative decrease was evident across diverse patient groups  
29 and after adjusting for age, sex, frailty, home location, malignancy diagnosis, healthcare utilization, and overall frailty. The findings  
30 also replicated in a subgroup analysis that matched patients on responsible physician, a sensitivity analysis based on a different  
31 socioeconomic measure of low-income status, and a validation study using a randomized survey design.  
32  
33  
34  
35

36  
37 Conclusions: Patients with low socioeconomic status less likely to receive medical assistance in dying under universal health  
38 insurance. An awareness of this imbalance may help in understanding patient decisions in less extreme clinical settings.  
39  
40  
41  
42  
43  
44  
45  
46  
47  
48  
49  
50  
51  
52  
53  
54  
55  
56  
57  
58  
59  
60

1 ARTICLE SUMMARY  
2  
3  
4  
5

6 Strengths & Limitations  
7

8  
9 Comprehensive analysis of palliative care patients who died in Canada's largest region assessing socioeconomic inequities around  
10 medical assistance in dying.  
11  
12

13  
14  
15  
16 Detailed statistics adjusting for observed factors, secondary analyses matching on exact responsible physician, and additional  
17 validation survey testing for unmeasured factors.  
18  
19

20  
21  
22  
23 Study limitations are inevitable since a randomized trial of medical assistance in dying is not ethical, feasible, or realistic.  
24  
25

26  
27  
28 Further limitations include the fallibility of estimating socioeconomic status that generally yields analyses that underestimate the  
29 magnitude of inequities.  
30  
31

32  
33  
34  
35 Additional limitations involve interpretation of results because socioeconomic status can be intertwined with patient preferences,  
36 communication patterns, or implicit bias.  
37  
38  
39  
40  
41  
42  
43  
44  
45  
46  
47  
48  
49  
50  
51  
52  
53  
54  
55  
56  
57  
58  
59  
60

## INTRODUCTION

Medical assistance in dying is free and legal in Canada.<sup>1</sup> An eligible patient must have a grievous and irremediable disease that causes intolerable suffering where death is reasonably foreseeable.<sup>2</sup> The common indications are metastatic cancer or a progressive neurologic illness.<sup>3</sup> Additional requirements include informed consent, second physician verification, attestation from impartial witnesses, and an interval for reflection.<sup>4</sup> These requirements are designed to avoid thoughtless impulsivity or interpersonal pressure. The protocol involves a series of medications including midazolam, propofol, and rocuronium.<sup>5</sup> Rates of medical assistance in dying vary substantially by region and currently average over 5,000 per year nationally.<sup>6 7</sup> Each case hinges on the concept of compassionate care for a suffering patient.

Socioeconomic status influences medical care in many situations. For example, poor patients relative to rich patients tend to be undertreated in a publicly-funded colon-cancer screening program.<sup>8</sup> To compensate, recommendations to provide care for poor patients have been fundamental in the practice of medicine since antiquity with persistent advocacy to treat those in most need.<sup>9 10 11 12 13</sup> Modern strategies to mitigate inequities tend to focus on situational barriers (eg, access to care) or patient factors (eg, life experience or community norms) and have not been fully successful.<sup>14 15</sup> In theory, the causes of socioeconomic inequities can be more complicated because medical treatment also depends on human judgment.

People are prone to pitfalls of reasoning in medical care.<sup>16 17</sup> Poor patients, for example, may feel less able to advocate for themselves or more reluctant to express their dissatisfaction.<sup>18 19 20</sup> In addition, clinicians may underestimate the distress experienced by poor patients due to faulty intuitions about a life of hardships (termed the thick-skinned fallacy).<sup>21 22 23</sup> We hypothesized such behavioral pitfalls may have implications for medical care, thereby leading to unequal patterns of care for poor and for rich patients experiencing a similar serious situation.<sup>24 25</sup> Here we explore how this hypothesis might extend to an extreme condition requiring understanding and communication; namely, medical assistance in dying for palliative care patients.

## METHODS

### Study Setting

Most Canadian adults strongly support medical assistance in dying, as indicated by national opinion polls conducted in recent years.<sup>26</sup> This support is nearly as strong among poor households (<\$40,000 annual income) and rich households (>\$100,000 annual income).<sup>27</sup> The Supreme Court of Canada ruled on February 6, 2015 that competent Canadian adults have the right to assistance in dying regardless of ability-to-pay and set June 17, 2016 as the implementation date for legalization.<sup>28</sup> Similar to other regions in Canada, medical assistance in dying became a benefit under universal health insurance in Ontario on June 6, 2016.<sup>29 30 31</sup> Ontario is Canada's largest province with a population of 13,448,494 in 2016 (study baseline).<sup>32 33 34</sup>

### Patient Selection



1 We identified older adults (age  $\geq 65$  years) who died with palliative care using valid linked databases.<sup>35 36 37 38</sup> We  
2 included deaths between June 1, 2016 and June 1, 2019 to reflect all years since legalization of medical assistance in dying. We  
3 identified palliative care by physician fees (OHIP code: K023) and required at least two contacts in the last month of life to ensure  
4 patients had an irremediable condition, death was reasonably foreseeable, and individuals had access to care.<sup>39</sup> Patients who  
5 received medical assistance in dying were identified from specifically defined outpatient pharmacy prescriptions (ODB codes:  
6 93877101 to 93877106).<sup>40</sup> The remaining patients were defined as receiving palliative care without medical assistance in  
7 dying. These stringent selection criteria undercount across cases compared to federal data sources.<sup>41</sup>

#### 14 Socioeconomic Status

15 We identified a patient's socioeconomic status based on the Statistics Canada official algorithm using the smallest  
16 population unit available (size about 500 persons).<sup>42 43 44</sup> These estimates reflected home neighborhood location, did not rely on  
17 self-report, and were validated in past research.<sup>45 46 47 48 49</sup> Individuals with missing data (<1%) were assigned to the lowest  
18 quintile to yield a fully comprehensive analysis and more conservative estimates.<sup>50</sup> The purpose of this approach was to avoid  
19 limitations in past research such as small sample sizes, subjective survey responses, volunteer participants, or uncontrolled analyses  
20 of socioeconomic status. The main limitation of our approach was potential random misclassification that would tend to bias  
21 comparisons to the null.<sup>51</sup>

#### 28 General Characteristics

29 Information on patient age, sex, and home location was based on linked demographic databases.<sup>52</sup> Additional linked  
30 healthcare databases were used to identify time of death (season, weekday, year), home location (urban, rural), and past medical  
31 care (clinic contacts, emergency visits, hospital admissions).<sup>53 54</sup> The Johns Hopkins University Adjusted Clinical Groups (ACG)  
32 score was used as an overall index of health status and general frailty.<sup>55 56</sup> Total medications during the final year of life were  
33 obtained using techniques previously validated at the Institute for Clinical Evaluative Sciences.<sup>57 58</sup> The available databases lacked  
34 information on self-identified race, ethnic background, religious affiliation, formal education, advance directives, and death certificate  
35 details.

#### 42 Clinical Characteristics

43 We further scanned individuals linked outpatient databases in the year prior to death to identify serious medical illnesses  
44 with particular attention to malignancy diagnoses (eg, respiratory tract cancer), neurologic diagnoses (eg, Parkinson's disease), and  
45 other life-threatening non-malignant diagnoses (eg, congestive heart failure).<sup>59</sup> Further comorbid conditions included common  
46 chronic diseases (eg, hypertension). Additional psychiatric diagnoses included depression.<sup>60</sup> We also gathered data on specific  
47 medications (eg, opioids).<sup>61</sup> The available databases lacked information on functional status, symptom severity, personal rationales,  
48 family relationships, social supports, cultural traditions, and informal thoughts.

### Statistical Analysis

The primary analysis examined the distribution of socioeconomic status among patients who received medical assistance in dying compared to controls who did not receive medical assistance in dying using an unpaired chi-square test. Logistic regression was used to further quantify associations using odds ratios to adjust for potential imbalances in demographic characteristics (age, sex, home location), health care utilization (prior year), and general frailty (Johns Hopkins ACG index). Logistic regression was also used to explore additional factors correlated with receiving medical assistance in dying. Calculations of attributable risk and attributable fractions were conducted using population-based methods.

We conducted two secondary analyses to validate results. First, we used a pair-matched approach (1-to-1 ratio) to identify similar patients who did and who did not receive medical assistance in dying according to age, sex, home location (urban, rural), and responsible physician (exact name).<sup>62</sup> The association between socioeconomic status and medical assistance in dying was then tested using methods suitable for matched designs.<sup>63 64</sup> Second, a further sensitivity analysis also examined the entire cohort by reclassifying socioeconomic status in a binary manner based on the specific government indicator for a low-income senior (ODB Plan Code R).<sup>65</sup> All analyses followed privacy safeguards at the Institute for Clinical Evaluative Sciences and were conducted using SAS software (version 9.45).

### Survey Validation

We conducted a randomized survey to indirectly check the association between socioeconomic status and estimates of patient suffering. In line with behavioral findings concerning estimating perceived discomfort among people,<sup>66</sup> the rationale was to explore whether clinicians tend to estimate poor patients as having the same suffering as rich patients in the same situation. The survey contained a single patient scenario formulated in two versions (rich, poor) differing by only one sentence (Appendix §1). The rich version described the patient as having had a lifetime of luxury. The poor version described the patient as having had a lifetime of hardship. The two versions were otherwise the same, randomly assigned to participants, and designed to elicit a clinician's estimate of patient suffering due to psychosocial or biomedical adverse events.<sup>67</sup>

### Patient and Public Involvement

Patients or the public were not involved in the design, conduct, reporting, or dissemination plans of our research.

## RESULTS

### Baseline Characteristics

During the three-year interval a total of 243,880 deaths were identified, of whom 50,096 received palliative care in the last month of life. Overall, 920 patients received medical assistance in dying and 49,176 controls did not receive medical assistance in dying (Table 1). The two groups were similar except those who received medical assistance in dying were slightly

1 more frequent in the later half of the study, relatively more likely to die on a weekday, and somewhat less frail. The typical patient  
2  
3 in both groups had a median age of 81 years, was diagnosed with a malignancy, and lived in a city. Three-quarters (72%, n =  
4  
5 36,274) were admitted to hospital in the year before dying and two-thirds (65%, n = 32,312) had an emergency visit in the  
6  
7 year before dying.

8  
9  
10 \*\*\* Table 1 About Here \*\*\*  
11  
12  
13  
14  
15  
16  
17  
18  
19  
20  
21  
22  
23  
24  
25  
26  
27  
28  
29  
30  
31  
32  
33  
34  
35  
36  
37  
38  
39  
40  
41  
42  
43  
44  
45  
46  
47  
48  
49  
50  
51  
52  
53  
54  
55  
56  
57  
58  
59  
60

Table 1. Patient Characteristics

|                                   |            | Medical Assistance in Dying (n = 920) | Palliative Control Patients (n = 49,176) |
|-----------------------------------|------------|---------------------------------------|------------------------------------------|
| Age                               | ≤ 75 years | 338 (37)                              | 15,211 (31)                              |
|                                   | > 75 years | 582 (63)                              | 33,965 (69)                              |
| Sex                               | Female     | 484 (53)                              | 24,826 (50)                              |
|                                   | Male       | 436 (47)                              | 24,350 (50)                              |
| Home Location *                   | Urban      | 812 (88)                              | 44,758 (91)                              |
|                                   | Rural      | 108 (12)                              | 4,418 (9)                                |
| Year of Death †                   | 2016 - 17  | 207 (23)                              | 21,532 (44)                              |
|                                   | 2018 - 19  | 713 (77)                              | 27,644 (56)                              |
| Season of Year                    | Spring     | 183 (20)                              | 10,958 (22)                              |
|                                   | Summer     | 198 (22)                              | 12,036 (24)                              |
|                                   | Autumn     | 265 (29)                              | 12,991 (26)                              |
|                                   | Winter     | 274 (30)                              | 13,191 (27)                              |
| Day of Death ¶                    | Weekday    | 778 (85)                              | 35,849 (73)                              |
|                                   | Weekend    | 142 (15)                              | 13,327 (27)                              |
| Malignancy Diagnosis #            | Present    | 661 (72)                              | 35,548 (72)                              |
|                                   | Absent     | 259 (28)                              | 13,628 (28)                              |
| Total Medications in Past Month ‡ | Mean       | 9.1 ± 5.3                             | 9.5 ± 6.2                                |
| Clinic Contacts in Past Year      | Mean       | 26.01 ± 16.02                         | 29.29 ± 18.40                            |
| Emergency Visits in Past Year     | Mean       | 1.33 ± 1.64                           | 1.59 ± 2.06                              |
| Admissions in Past Year           | Mean       | 0.93 ± 1.15                           | 1.53 ± 1.53                              |
| Overall Frailty in Past Year §    | Mean       | 8.62 ± 3.75                           | 10.56 ± 3.65                             |

Footnotes

data are count (percentage) except where noted as mean ± standard deviation

\* missing values assigned to rural (n = 109 of 50,096)

† denotes first 18 months (2016–2017) and second 18 months (2018–2019), respectively

¶ Saturday and Sunday denote weekend

# detailed diagnoses appear in Appendix §2

‡ detailed medications appear in Appendix §3

§ based on Johns Hopkins Ambulatory Care Groups

## Diagnoses and Treatment

Analysis of individual medical records indicated the two groups of patients had a similar burden of disease in the last year of life (Appendix §2). The most frequent specific malignancies were cancers of the respiratory tract and digestive tract. Important additional diagnoses included congestive heart failure and pulmonary fibrosis. Many patients also had additional comorbidities including hypertension, diabetes, and anxiety. A formal diagnosis of depression was rare in both groups. The most common medication in the last month of life was an opioid analgesic (Appendix §3). The two groups had similar prescription profiles except patients who chose medical assistance in dying were somewhat more likely to be treated with an opioid or a benzodiazepine.

## Socioeconomic Status

Medical assistance in dying was proportionately less frequent for patients with low socioeconomic status (166 of 11,008) than patients with high socioeconomic status (227 of 9,277). Stratified analysis showed intermediate findings for patients with intermediate socioeconomic quintiles (Figure 1). Based on the case-control design, this association equaled a 39% reduced frequency of receiving medical assistance in dying associated with low socioeconomic status relative to high socioeconomic status (odds ratio = 0.61, 95% confidence interval 0.50 to 0.75,  $p < 0.001$ ). The discrepancy equated to a net difference of 306 fewer cases of medical assistance in dying than would have been expected if all patients had the pattern of those in the highest socioeconomic quintile.

\*\*\* Figure 1 About Here \*\*\*

## Secondary Analyses of Subgroups

The decreased frequency of receiving medical assistance in dying associated with low socioeconomic status extended to diverse subgroups. The decrease was evident regardless of age and sex (Figure 2). The decrease was observed in the first half and the second half of the study (and regardless of weekday). Similarly, the decrease was observed for those with and those without a malignancy diagnosis. In addition, the decrease extended to patients regardless of healthcare utilization and frailty. No subgroup showed contrary findings except for rural patients (not significant). All subgroups with at least 50 cases showed a statistically significant decreased frequency of medical assistance in dying associated with low socioeconomic status.

\*\*\* Figure 2 About Here \*\*\*

## Additional Predictors

Several other patient characteristics were associated with a decreased frequency of receiving medical assistance in dying (Table 2). Patients older than 75 years were less likely to receive medical assistance in dying than their younger counterparts. Similarly, patients who had relatively more frailty or relatively more hospital admissions were less likely to receive medical assistance

1  
2  
3  
4  
5  
6  
7  
8  
9  
10  
11  
12  
13  
14  
15  
16  
17  
18  
19  
20  
21  
22  
23  
24  
25  
26  
27  
28  
29  
30  
31  
32  
33  
34  
35  
36  
37  
38  
39  
40  
41  
42  
43  
44  
45  
46  
47  
48  
49  
50  
51  
52  
53  
54  
55  
56  
57  
58  
59  
60

in dying. In contrast, sex, home location, clinic contacts, and emergency department visits were not significantly associated with medical assistance in dying. Accounting for all characteristics suggested that low socioeconomic status was associated with a 37% decreased frequency of receiving medical assistance in dying (odds ratio = 0.63, 95% confidence interval 0.51 to 0.77,  $p < 0.001$ ).

\*\*\* Table 2 About Here \*\*\*

For peer review only

Table 2. Predictors of Medical Assistance in Dying

| Variable                        | BASIC ANALYSIS * |                     | ADJUSTED ANALYSIS † |                     |
|---------------------------------|------------------|---------------------|---------------------|---------------------|
|                                 | Relative Risk    | Confidence Interval | Relative Risk       | Confidence Interval |
| Income Quintile ‡               | 0.61             | 0.50 to 0.75        | 0.63                | 0.51 to 0.77        |
| Age > 75 Years                  | 0.77             | 0.67 to 0.88        | 0.71                | 0.62 to 0.82        |
| Male Sex                        | 0.92             | 0.81 to 1.05        | 0.97                | 0.85 to 1.11        |
| Rural Home Location §           | 1.35             | 1.10 to 1.65        | 1.16                | 0.94 to 1.43        |
| Malignancy Diagnosis ¶          | 0.98             | 0.85 to 1.13        | 0.99                | 0.98 to 1.01        |
| Total Medications ^             | 1.00             | 1.00 to 1.01        | 1.02                | 1.01 to 1.02        |
| Clinic Contacts in Past Year ^  | 0.99             | 0.98 to 0.99        | 0.99                | 0.99 to 1.00        |
| Emergencies in Past Year ^      | 0.93             | 0.89 to 0.96        | 1.01                | 0.97 to 1.05        |
| Admissions in Past Year ^       | 0.69             | 0.65 to 0.73        | 0.80                | 0.74 to 0.86        |
| Overall Frailty in Past Year ¶¶ | 0.87             | 0.85 to 0.88        | 0.90                | 0.88 to 0.92        |

Footnotes

\* no adjustment for baseline differences

† adjusted for age, sex, location, malignancy, medications, contacts, emergencies, admissions, frailty

‡ compares lowest to highest quintile

§ referent is urban location

¶ denotes one or more diagnoses

^ covariate coded as a continuous variable

¶¶ defined by Johns Hopkins frailty index

### Matched Analysis

We rechecked results by comparing each patient who received medical assistance in dying with a matched control who did not receive medical assistance in dying and who was also treated by the same responsible physician. This yielded **448** matched pairs (n = **896** patients). Overall, the case and matched control had the same socioeconomic status in **26%** of pairs (**118** of **448**), the case had a higher socioeconomic status in **42%** of pairs (**186** of **448**) and the case had a lower socioeconomic status in **32%** of pairs (**144** of **448**). This matched analysis yielded results that overlapped the main analysis and showed a **23%** decrease of medical assistance in dying associated with lower socioeconomic status (odds ratio = **0.77**, 95% confidence interval **0.62** to **0.96**, p = **0.021**).

### Alternate Index of Socioeconomic Status

We also retested results by characterizing each individual patient according to whether they were classified by the specific government indicator as a low-income senior. Overall, **8,029** patients were identified as low-income seniors and the remaining **42,067** patients were identified as not low-income seniors. Medical assistance in dying was proportionately less frequent for patients who were low-income seniors (**65** of **8,029**) than patients who were not low-income seniors (**855** of **42,067**). This sensitivity analysis yielded results that overlapped the main analysis and showed a **60%** decrease of medical assistance in dying among low-income seniors (odds ratio = **0.40**, 95% confidence interval **0.31** to **0.51**, p < **0.001**).

### Survey Validation

We surveyed clinicians at a coffee shop inside a leading Canadian hospital that provided medical assistance in dying.<sup>68</sup> Each participant received one version (rich patient or poor patient) of the survey by randomized assignment (Appendix §1). The typical participant was a middle-aged woman with medical professional training and years of experience (n = **494**). We found that overall mean estimates of suffering were higher when assessing a rich patient rather than a poor patient in the survey that otherwise contained identical information about an adverse patient event (**7.8** vs **7.3**, p < **0.001**). This difference in estimated patient suffering extended to each of the three psychosocial adverse events and not the one biomedical adverse event (Figure 3).

\*\*\* Figure 3 About Here \*\*\*

## DISCUSSION

We studied thousands of deaths in Canada and found that medical assistance in dying was significantly less frequent for palliative care patients who had low rather than high socioeconomic status. The imbalance extended through the range of socioeconomic status and was equally strong during initial and later years of the study. The imbalance could not be easily attributed to access to care, ability to pay, medical diagnoses, intensity of medications, choice of physician, responsiveness to treatment, public



1 preferences, thoughtless impulsivity, or reciprocal compensation.<sup>69 70 71 72 73</sup> The findings also differ from statistics on suicide  
2 deaths that are higher among poor rather than rich adults.<sup>74</sup> This practice pattern variation is robust and begs for an explanation.  
3  
4  
5

6 Our research supports earlier patterns observed in other countries around medical assistance in dying. In particular,  
7 patients in the USA undergoing legalized assisted dying are more likely to be highly educated and financially secure compared to the  
8 population average.<sup>75 76</sup> Patients in the Netherlands receiving assisted dying are prone to have comparative social, economic, and  
9 educational privileges.<sup>77</sup> Patients in Switzerland who undergo assisted dying tend to live in affluent neighborhoods.<sup>78 79</sup> Patients in  
10 Belgium who receive assisted dying tend to have higher education.<sup>80</sup> To our knowledge, these tangential findings apparent in past  
11 studies have not been rigorously analyzed and have typically been ascribed to economic constraints.<sup>81</sup>  
12  
13  
14  
15  
16  
17

18 Our data suggest the unequal distribution of medical assistance in dying may occur beyond aspects of care related to  
19 cost.<sup>82</sup> One factor could be faulty doctor–patient communication. Poor patients often feel disempowered to advocate for  
20 themselves, have lower trust in a healthcare system, and may have less rapport with clinicians who elicit their preferences.<sup>83 84</sup>  
21 Religion, ethnicity, or another confounder could also contribute if rich patients plan more advance directives or suffer more  
22 existential distress.<sup>85 86 87 88</sup> Another possibility is that clinicians dislike controversy and want to avoid appearing callous towards  
23 the poor.<sup>89</sup> To be sure, our study does not determine the appropriateness of medical assistance in dying and, for many, the choice  
24 is unthinkable.<sup>90 91 92</sup>  
25  
26  
27  
28  
29  
30  
31

32 The observed unequal treatment might also reflect faulty intuition. The thick–skin bias describes a tendency to perceive  
33 individuals of lower income as less distressed by negative events and reflects an implicit belief that repeated hardships lead to  
34 increased tolerance.<sup>93 94 95</sup> Similar to other implicit biases, this error might originate from a common assumption; specifically,  
35 people sometimes adapt to difficult situations, shift their expectations, and increase their tolerance.<sup>96 97 98</sup> The intuition fails,  
36 however, when hardships lead to resignation instead of resiliency. In effect, the chronic stress of poverty might not buffer against  
37 the added challenges from ill health.<sup>99</sup> Such faulty intuitions might add to a paradox of lesser care despite serious clinical needs.<sup>100</sup>  
38  
39  
40  
41  
42  
43  
44  
45  
46  
47  
48  
49  
50  
51  
52  
53  
54  
55  
56  
57  
58  
59  
60

Several limitations of our study merit emphasis for future research. Socioeconomic status measures are imperfect, tend to  
bias analyses toward the null, and may underestimate disparities in care.<sup>103</sup> In addition, disadvantaged groups tend to access  
palliative care less often than privileged groups, thereby causing our study to underestimate upstream socioeconomic barriers ahead  
of receiving care.<sup>104 105</sup> We also lacked data on race and patients younger than 65 years, thereby justifying further analyses in  
other groups. Medical assistance in dying, itself, has different meanings depending on available alternatives and a patient's own  
beliefs.<sup>106 107</sup> The scientific domains of health inequities and of terminal care are, themselves, complex topics often guided by  
moral principles rather than behavioral economic analysis.<sup>108 109 110 111 112</sup>

1  
2  
3 Additionally, our data address lingering misconceptions around the medical care implications of the Supreme Court of  
4 Canada decision. First, medical assistance in dying has not led to a large drop in palliative care; instead, rates of palliative care  
5 increased during the study.<sup>113</sup> Second, medical assistance in dying has not become widely popular despite being free and legal;  
6 instead, the practice accounts for fewer than 2% of deaths in palliative care patients.<sup>114</sup> Third, medical assistance in dying has not  
7 been unjustly targeted toward poor patients; instead, wealthy patients are disproportionately involved.<sup>115 116 117</sup> More broadly, the  
8 data might inform patient engagement for less extreme decisions where poor patients might be disempowered or clinicians may feel  
9 disinclined to push.  
10  
11  
12  
13  
14  
15  
16  
17  
18  
19  
20  
21  
22  
23  
24  
25  
26  
27  
28  
29  
30  
31  
32  
33  
34  
35  
36  
37  
38  
39  
40  
41  
42  
43  
44  
45  
46  
47  
48  
49  
50  
51  
52  
53  
54  
55  
56  
57  
58  
59  
60

## ACKNOWLEDGMENTS

We thank Maya Bar-Hillel, Nathan Cheek, Victor Fuchs, Alan Garber, Kevin Imrie, Fizza Manzoor, Dorothy Pringle, Raffi Rush, Michael Schull, Debbie Selby, and Jack Williams for helpful suggestions on specific points. The views expressed are those of the authors and do not necessarily reflect the Ontario Ministry of Health.

## FUNDING

This project was supported by the Alfred P. Sloan Foundation (#2014-6-16), a Canada Research Chair in Medical Decision Sciences (#950-231316), the Canadian Institutes of Health Research (#436011), the National Science Foundation (#SES-1426642), and the Sunnybrook Research Institute Summer Scholarship Award Program (#001).

## CONFLICTS

The funding organizations had no role in the design and conduct of the study; collection, management, analysis, and interpretation of the data; and preparation, review, or approval of the manuscript. All authors have no financial or personal relationships or affiliations that could influence the decisions and work on this manuscript.

## CONTRIBUTORSHIP

The lead author (DAR) wrote the first draft. All authors (DAR, KN, DT, ES) contributed to study design, manuscript preparation, data analysis, results interpretation, critical revisions and final decision to submit. The lead author (DAR) had full access to all the data in the study, takes responsibility for the integrity of the data and is accountable for the accuracy of the analysis.

## APPROVALS

The protocol was approved by the Sunnybrook Research Ethics board and conducted using privacy safeguards at the Institute for Clinical Evaluative Sciences (ID 001). Parts of this material are based on data compiled by CIHI; however, the analyses, conclusions, and statements expressed are those of the authors and not necessarily those of CIHI. We thank IMS Brogan Inc. for use of the Drug Information Database

## DATA SHARING

The de-identified data collected for this study are available in an appendix included at the time of original manuscript submission and also are available following publication for researchers whose proposed use of data has been approved by an independent review committee. The Johns Hopkins ACG© System is available through the Department of Health Policy and Management at the Johns Hopkins University.

## TRANSPARENCY STATEMENT

1 The lead author affirms that the manuscript is an honest accurate and transparent account of the study being reported; that no  
2 important aspects of the study have been omitted; and that any discrepancies from the study as originally planned have been  
3 explained.  
4  
5

#### 6 7 8 ACCOUNTABILITY

9  
10 The lead author (DAR) had full access to all the data in the study, takes responsibility for the integrity of the data, and is  
11 accountable for the accuracy of the analysis.  
12  
13

#### 14 15 DISSEMINATION STATEMENT

16 We plan to disseminate the results to patients and patient organizations.  
17  
18  
19  
20  
21  
22  
23  
24  
25  
26  
27  
28  
29  
30  
31  
32  
33  
34  
35  
36  
37  
38  
39  
40  
41  
42  
43  
44  
45  
46  
47  
48  
49  
50  
51  
52  
53  
54  
55  
56  
57  
58  
59  
60

## REFERENCES

- 1  
2  
3  
4  
5 <sup>1</sup> Nicol J, Tiedemann M. Bill C-14: An Act to amend the Criminal Code and to make related  
6 amendments to other Acts (medical assistance in dying). Ottawa: Library of Parliament;  
7 2018. Report No.: 42-1-C14-E.
- 8  
9 <sup>2</sup> Orentlicher D, Pope TM, Rich BA, Physician Aid-in-Dying Clinical Criteria Committee.  
10 Clinical criteria for physician aid in dying. *Journal of Palliative Medicine*. 2016;19(3):259-  
11 62.
- 12  
13 <sup>3</sup> Wiebe E, Shaw J, Green S, Trouton K, Kelly M. Reasons for requesting medical assistance in  
14 dying. *Canadian Family Physician*. 2018;64(9):674-9.
- 15  
16 <sup>4</sup> Li M, Watt S, Escaf M, Gardam M, Heesters A, O'Leary G, Rodin G. Medical assistance in  
17 dying—implementing a hospital-based program in Canada. *N Engl J Med*.  
18 2017;376(21):2082-8.
- 19  
20 <sup>5</sup> Rosso AE, Huyer D, Walker A. Analysis of the medical assistance in dying cases in Ontario:  
21 understanding the patient demographics of case uptake in Ontario since the Royal Assent  
22 and amendments of Bill C-14 in Canada. *Academic Forensic Pathology*. 2017;7(2):263-87.
- 23  
24 <sup>6</sup> Health Canada. Second interim report on medical assistance in dying in Canada. Ottawa:  
25 Health Canada; 2017. Report No.: 170252.
- 26  
27 <sup>7</sup> Health Canada. Third interim report on medical assistance in dying in Canada. Ottawa:  
28 Health Canada; 2018. Report No.: 180006.
- 29  
30 <sup>8</sup> Buchman S, Rozmovits L, Glazier RH. Equity and practice issues in colorectal cancer  
31 screening: Mixed-methods study. *Can Fam Physician*. 2016;62(4):e186-93.
- 32  
33 <sup>9</sup> Jonsen AR. A short history of medical ethics. New York: Oxford University Press; 2000.
- 34  
35 <sup>10</sup> Hart JT. The inverse care law. *The Lancet*. 1971;297(7696):405-12.
- 36  
37 <sup>11</sup> Williamson DL, Stewart MJ, Hayward K, Letourneau N, Makwarimba E, Masuda J, Raine K,  
38 Reutter L, Rootman I, Wilson D. Low-income Canadians' experiences with health-related  
39 services: implications for health care reform. *Health Policy*. 2006;76(1):106-21.
- 40  
41 <sup>12</sup> Casalino LP. Professionalism and caring for Medicaid patients—the 5% commitment?. *N*  
42 *Engl J Med*. 2013;369(19):1775-7.
- 43  
44 <sup>13</sup> Bump J, Cashin C, Chalkidou K, Evans D, González-Pier E, Guo Y, Holtz J, Htay DT, Levin C,  
45 Marten R, Mensah S. Implementing pro-poor universal health coverage. *The Lancet Global*  
46 *Health*. 2016;4(1):e14-6.
- 47  
48 <sup>14</sup> Isaacs SL, Schroeder SA. Class--the ignored determinant of the nation's health. *N Engl J*  
49 *Med*. 2004;351(11):1137-1142.

- 1  
2  
3 15 Bor J, Cohen GH, Galea S. Population health in an era of rising income inequality: USA,  
4 1980–2015. *The Lancet*. 2017;389(10077):1475-90.  
5  
6 16 Redelmeier DA, Rozin P, Kahneman D. Understanding patients' decisions. Cognitive and  
7 emotional perspectives. *JAMA*. 1993;270(1):72-6.  
8  
9 17 Shafir E. [ed]. *The behavioral foundations of public policy*. Princeton, New Jersey:  
10 Princeton University Press, 2013.  
11  
12 18 Mani A, Mullainathan S, Shafir E, Zhao J. Poverty impedes cognitive function. *Science*  
13 2013;341(6149):976-80.  
14  
15 19 Tesarz J, Eich W, Treede RD, Gerhardt A. Altered pressure pain thresholds and increased  
16 wind-up in adult patients with chronic back pain with a history of childhood maltreatment:  
17 a quantitative sensory testing study. *Pain*. 2016;157(8):1799-809.  
18  
19 20 Gerber MM, Frankfurt SB, Contractor AA, Oudshoorn K, Dranger P, Brown LA. Influence of  
20 multiple traumatic event types on mental health outcomes: does count matter? *J*  
21 *Psychopath Behav Assess* 2018;40:645-54.  
22  
23 21 Stebbins J. The Law of Diminishing Returns. *Science*. 1944;99(2571):267-71.  
24  
25 22 Hoffman KM, Trawalter S. Assumptions about life hardship and pain perception. *Group*  
26 *Processes & Intergroup Relations*. 2016;19:493-508.  
27  
28 23 Cheek NN, Shafir E. The thick skin bias in judgments about people in poverty.  
29 *Behavioural Public Policy* 2020;4:1-26.  
30  
31 24 Kahneman D, Tversky A. Prospect theory: an analysis of decision under risk.  
32 *Econometrica* 1979;47:263-92.  
33  
34 25 Mullainathan S, Shafir E. *Scarcity: The new science of having less and how it defines our*  
35 *lives*. New York: Picador; 2014.  
36  
37 26 Attaran A. Unanimity on death with dignity—legalizing physician-assisted dying in  
38 Canada. *N Engl J Med*. 2015;372(22):2080-2.  
39  
40 27 Ipsos Reid. *Eight in Ten Canadians Support Advance Consent to Physician-Assisted*  
41 *Dying*. Toronto: Ipsos Reid; 2016. Available from: [https://www.ipsos.com/en-ca/news-](https://www.ipsos.com/en-ca/news-polls/eight-ten-80-canadians-support-advance-consent-physician-assisted-dying)  
42 [polls/eight-ten-80-canadians-support-advance-consent-physician-assisted-dying](https://www.ipsos.com/en-ca/news-polls/eight-ten-80-canadians-support-advance-consent-physician-assisted-dying)  
43  
44 28 Chochinov HM, Frazee C. Finding a balance: Canada's law on medical assistance in dying.  
45 *The Lancet*. 2016;388(10044):543-5.  
46  
47 29 Ministry of Health and Long Term Care Strategic Policy Branch. *Medical Assistance in*  
48 *Dying*. Ontario: Ministry of Health and Long Term Care; 2016. Available from:  
49 <http://www.health.gov.on.ca/en/pro/programs/ohip/bulletins/4000/bul4670.pdf>  
50  
51  
52  
53  
54  
55  
56  
57  
58  
59

1  
2  
3 30 Ministry of Health and Long Term Care & Ontario Medical Association. OHIP payment for  
4 medical assistance in dying. Ontario: Ministry of Health and Long Term Care; 2018.  
5 Available from: [https://www.oma.org/wp-content/uploads/MAID\\_Billing-Guide-final-](https://www.oma.org/wp-content/uploads/MAID_Billing-Guide-final-18Oct2018.pdf)  
6 [18Oct2018.pdf](https://www.oma.org/wp-content/uploads/MAID_Billing-Guide-final-18Oct2018.pdf)  
7

8  
9 31 Ontario Ministry of Health Ministry of Long Term Care. Medical Assistance in Dying.  
10 Toronto: Government of Ontario, 2018. Available from:  
11 <http://www.health.gov.on.ca/en/pro/programs/maid/>. Accessed on 2021 Jan 10.  
12

13 32 Statistics Canada. Canada at a Glance 2010 - Population [Internet]. 2010 [cited 2019 Mar  
14 17]. Available from: [https://www150.statcan.gc.ca/n1/pub/12-581-x/2010000/pop-](https://www150.statcan.gc.ca/n1/pub/12-581-x/2010000/pop-eng.htm)  
15 [eng.htm](https://www150.statcan.gc.ca/n1/pub/12-581-x/2010000/pop-eng.htm)  
16

17  
18 33 About Ontario [Internet]. Government of Ontario. 2019 [cited 2019 Mar 17]. Available  
19 from: <https://www.ontario.ca/page/about-ontario>  
20

21  
22 34 Government of Canada. Medical assistance in dying. Ottawa: Government of Canada,  
23 2020. Available from [https://www.canada.ca/en/health-canada/services/medical-](https://www.canada.ca/en/health-canada/services/medical-assistance-dying.html)  
24 [assistance-dying.html](https://www.canada.ca/en/health-canada/services/medical-assistance-dying.html). Accessed on 2021 Jan 20.  
25

26  
27 35 Institute for Clinical Evaluative Sciences. Data dictionary: library. Toronto, Ontario:  
28 Institute for Clinical Evaluative Sciences. Available from:  
29 <https://datadictionary.ices.on.ca/Applications/DataDictionary/Default.aspx>. Accessed  
30 2019 Feb 11.  
31

32  
33 36 Iron K, Manuel DG. Quality assessment of administrative data (QuAAD): an opportunity  
34 for enhancing Ontario's health data. Toronto, Ontario: Institute for Clinical Evaluative  
35 Sciences (ICES), 2007.  
36

37  
38 37 Iron K, Zagorski B, Sykora K. Living and dying in Ontario: An opportunity for improved  
39 health information—ICES investigative report. Toronto, Ontario: Institute for Clinical  
40 Evaluative Sciences (ICES), 2008.  
41

42  
43 38 Institute for Clinical Evaluative Sciences. Working with ICES data. Toronto, Ontario:  
44 Institute for Clinical Evaluative Sciences (ICES) Available from: [www.ices.on.ca/Data-and-](http://www.ices.on.ca/Data-and-Privacy/ICES-data/Working-with-ICES-Data)  
45 [Privacy/ICES-data/Working-with-ICES-Data](http://www.ices.on.ca/Data-and-Privacy/ICES-data/Working-with-ICES-Data). Accessed 2019 Feb 11.  
46

47  
48 39 Ministry of Health and Long Term Care. Schedule of Benefits. Ontario: Ministry of Health  
49 and Long Term Care; 2015.  
50

51  
52 40 Ministry of Health and Long Term Care. Ontario Drug Benefit Formulary/Comparative  
53 Drug Index. Ontario: Ministry of Health and Long Term Care; 2018.  
54

55  
56 41 Health Canada. First Annual Report on Medical Assistance in Dying in Canada 2019.  
57 Ottawa: Government of Canada, 2020. Available from  
58 [https://www.canada.ca/content/dam/hc-sc/documents/services/medical-assistance-](https://www.canada.ca/content/dam/hc-sc/documents/services/medical-assistance-dying-annual-report-2019/maid-annual-report-eng.pdf)  
59 [dying-annual-report-2019/maid-annual-report-eng.pdf](https://www.canada.ca/content/dam/hc-sc/documents/services/medical-assistance-dying-annual-report-2019/maid-annual-report-eng.pdf). Accessed on 2021 Jan 20.  
60

- 1  
2  
3 42 Love R, Wolfson MC, Statistics Canada- Consumer Income and Expenditure Division.  
4 Income Inequality: Statistical Methodology and Canadian Illustrations. Ottawa: Statistics  
5 Canada. 1976.  
6
- 7 43 Alter DA, Naylor CD, Austin P, Tu JV. Effects of socioeconomic status on access to invasive  
8 cardiac procedures and on mortality after acute myocardial infarction. *New England*  
9 *Journal of Medicine*. 1999;341(18):1359-67.  
10
- 11 44 Finkelstein MM. Ecologic proxies for household income: how well do they work for the  
12 analysis of health and health care utilization? *Can J Public Health*. 2004;95(2):90-4.  
13
- 14 45 Krieger N. Overcoming the absence of socioeconomic data in medical records: validation  
15 and application of a census-based methodology. *American Journal of Public Health*.  
16 1992;82(5):703-10.  
17
- 18 46 Mustard CA, Derksen S, Berthelot JM, Wolfson M. Assessing ecologic proxies for  
19 household income: a comparison of household and neighbourhood level income measures  
20 in the study of population health status. *Health&Place*. 1999;5(2):157-71.  
21
- 22 47 Glazier RH, Creatore MI, Agha MM, Steele LS, Hwang S, Rhodes A, Steele L, Badgley R,  
23 Clark J, Cohen MM, Badley EM. Socioeconomic misclassification in Ontario's health care  
24 registry. *Canadian Journal of Public Health*. 2003;94(2):140-3.  
25
- 26 48 Statistics Canada (2006). Income and earnings reference guide, 2006 census. Catalogue  
27 no. 97-563-GWE2006003. Available at: [http://www12.statcan.gc.ca/census-](http://www12.statcan.gc.ca/census-recensement/2006/ref/rp-guides/income-revenu-eng.cfm)  
28 [recensement/2006/ref/rp-guides/income-revenu-eng.cfm](http://www12.statcan.gc.ca/census-recensement/2006/ref/rp-guides/income-revenu-eng.cfm).  
29
- 30 49 Statistics Canada. 2006 Census Dictionary. Available at: [www.statcan.gc.](http://www.statcan.gc.ca)  
31 [ca](http://www.statcan.gc.ca).  
32
- 33 50 Hayden GF, Kramer MS, Horwitz RI. The case-control study: a practical review for the  
34 clinician. *JAMA*. 1982;247(3):326-31.  
35
- 36 51 Pampalon R, Hamel D, Gamache P. A comparison of individual and area-based socio-  
37 economic data for monitoring social inequalities in health. *Health Reports*. 2009;20(4):85.  
38
- 39 52 Government of Ontario. Registered Persons Database [Internet]. Ontario: Government of  
40 Ontario; 2017 [cited 2019]. Available from: [https://www.ontario.ca/data/registered-](https://www.ontario.ca/data/registered-persons-database-rpdb)  
41 [persons-database-rpdb](https://www.ontario.ca/data/registered-persons-database-rpdb)  
42
- 43 53 Goel V, Williams JI, Anderson GM, Blackstein-Hirsch P, Fooks C, Naylor CD. Patterns of  
44 health care in Ontario - The ICES practice atlas. Ontario: ICES; 1996.  
45
- 46 54 Jaakkimainen L, Upshur R, Klein-Geltink JE, Leong A, Maaten S, Schultz SE, Wang L.  
47 Primary care in Ontario: ICES atlas. Toronto: Institute for Clinical Evaluative Sciences,  
48 2006.  
49  
50  
51  
52  
53  
54  
55  
56  
57  
58  
59  
60



- 1  
2  
3 55 Sibley LM, Moineddin R, Agha MM, Glazier RH. Risk adjustment using administrative  
4 data-based and survey-derived methods for explaining physician utilization. *Med Care*.  
5 2010;48(2):175-82.  
6  
7 56 Austin PC, van Walraven C, Wodchis WP, Newman A, Anderson GM. Using the Johns  
8 Hopkins Aggregated Diagnosis Groups (ADGs) to predict mortality in a general adult  
9 population cohort in Ontario, Canada. *Med Care*. 2011;49(10):932-9.  
10  
11 57 Guilcher SJ, Bronskill SE, Guan J, Wodchis WP. Who Are the High-Cost Users? A Method  
12 for Person-Centred Attribution of Health Care Spending. *PLoS One*. 2016 Mar  
13 3;11(3):e0149179.  
14  
15 58 Wodchis WP, Austin PC, Henry DA. A 3-year study of high-cost users of health care. *CMAJ*.  
16 2016;188(3):182-188.  
17  
18 59 Tu K, Campbell NR, Chen ZL, Cauch-Dudek KJ, McAlister FA. Accuracy of administrative  
19 databases in identifying patients with hypertension. *Open Medicine*. 2007;1(1):e18.  
20  
21 60 Gandhi S, Chiu M, Lam K, Cairney JC, Guttman A, Kurdyak P. Mental health service use  
22 among children and youth in Ontario: Population-based trends over time. *Canadian Journal*  
23 *of Psychiatry*. 2016;61(2):119-24.  
24  
25 61 Levy AR, O'Brien BJ, Sellors C, Grootendorst P, Willison D. Coding accuracy of  
26 administrative drug claims in the Ontario Drug Benefit database. *Can J Clin Pharmacol*.  
27 2003;10(2):67-71.  
28  
29 62 Redelmeier DA, Tibshirani RJ. Methods for analyzing matched designs with double  
30 controls: excess risk is easily estimated and misinterpreted when evaluating traffic deaths.  
31 *J Clin Epidemiol*. 2018;98:117-122.  
32  
33 63 Breslow NE, Day NE. Analysis of case-control studies. Lyon, France: International  
34 Agency for Research on Cancer; 1980.  
35  
36 64 Wacholder S, Weinberg CR. Paired versus two-sample design for a clinical trial of  
37 treatments with dichotomous outcome: Power considerations. *Biometrics*.  
38 1982;38(3):801-12.  
39  
40 65 Vozoris NT, Yao Z, Li P, Austin PC, Stephenson AL, Gill SS, O'Donnell DE, Gershon AS,  
41 Rochon PA. Prescription synthetic oral cannabinoid use among older adults with chronic  
42 obstructive pulmonary disease: a population-based cohort study. *Drugs & Aging*.  
43 2019;36(11):1035-45.  
44  
45 66 Cheek NN, Shafir E. The thick skin bias in judgments about people in poverty.  
46 *Behavioural Public Policy* 2020;4:1-26.  
47  
48 67 Krueger AB, Stone AA. Psychology and economics. Progress in measuring subjective well-  
49 being. *Science*. 2014;346(6205):42-3.  
50  
51  
52  
53  
54  
55  
56  
57  
58  
59  
60

- 1  
2  
3 68 Selby D, Bean S, Isenberg-Grzeda E, Bioethics BHD, Nolen A. Medical assistance in dying  
4 (MAiD): A descriptive study from a Canadian tertiary care hospital. *Am J Hosp Palliat Care*.  
5 2019. [Epub ahead of print]  
6
- 7 69 Ayers I. Fair driving: gender and race discrimination in retail car negotiations. *Harvard*  
8 *Law Review* 1991;104:817-72.  
9
- 10 70 Redelmeier DA, Cialdini RB. Problems for clinical judgement: 5. Principles of influence in  
11 medical practice. *CMAJ*. 2002;166(13):1680-4.  
12
- 13 71 Redelmeier DA, Dickinson VM. Determining whether a patient is feeling better: pitfalls  
14 from the science of human perception. *J Gen Intern Med*. 2011;26(8):900-6.  
15
- 16 72 Redelmeier DA, Dickinson VM. Judging whether a patient is actually improving: more  
17 pitfalls from the science of human perception. *J Gen Intern Med*. 2012;27(9):1195-9.  
18
- 19 73 Ho TH, Barbera L, Saskin R, Lu H, Neville BA, Earle CC. Trends in the aggressiveness of  
20 end-of-life cancer care in the universal health care system of Ontario, Canada. *Journal of*  
21 *Clinical Oncology*. 2011;29(12):1587-91.  
22
- 23 74 Tjepkema M, Wilkins R, Long A. Cause-specific mortality by income adequacy in Canada:  
24 A 16-year follow-up study. *Health Rep*. 2013;24(7):14-22.  
25
- 26 75 Prokopetz JJ, Lehmann LS. Redefining physicians' role in assisted dying. *N Engl J Med*.  
27 2012;367(2):97-9.  
28
- 29 76 Boudreau JD, Somerville MA, Biller-Andorno N. Clinical decisions. Physician-assisted  
30 suicide. *N Engl J Med*. 2013;368(15):1450-2.  
31
- 32 77 Battin MP, van der Heide A, Ganzini L, van der Wal G, Onwuteaka-Philipsen BD. Legal  
33 physician-assisted dying in Oregon and the Netherlands: evidence concerning the impact  
34 on patients in "vulnerable" groups. *J Med Ethics*. 2007;33(10):591-7.  
35
- 36 78 Steck N, Junker C, Zwahlen M; Swiss National Cohort. Increase in assisted suicide in  
37 Switzerland: did the socioeconomic predictors change? Results from the Swiss National  
38 Cohort. *BMJ Open*. 2018;8(4):e020992.  
39
- 40 79 Steck N, Junker C, Maessen M, Reisch T, Zwahlen M, Egger M, Swiss National Cohort.  
41 Suicide assisted by right-to-die associations: a population based cohort study. *International*  
42 *Journal of Epidemiology*. 2014;43(2):614-22.  
43
- 44 80 Dierickx S, Deliens L, Cohen J, Chambaere K. Comparison of the expression and granting  
45 of requests for euthanasia in Belgium in 2007 vs 2013. *JAMA Internal Medicine*.  
46 2015;175(10):1703-6.  
47
- 48 81 Sulmasy LS, Mueller PS. Ethics and the legalization of physician-assisted suicide: an  
49 American College of Physicians position paper. *Annals of Internal Medicine*.  
50 2017;167(8):576-8.  
51

- 1  
2  
3  
4 82 Redelmeier DA, Detsky AS. Economic theory and medical assistance in dying. *Appl Health Econ Health Policy*. 2020. doi: 10.1007/s40258-020-00587-4.  
5  
6  
7 83 Verlinde E, De Laender N, De Maesschalck S, Deveugele M, Willems S. The social gradient  
8 in doctor-patient communication. *International Journal for Equity in Health*. 2012;11(1):1-  
9 14.  
10  
11 84 Wright AC, Shaw JC. The spectrum of end of life care: an argument for access to medical  
12 assistance in dying for vulnerable populations. *Medicine, Health Care and Philosophy*.  
13 2019;22(2):211-9.  
14  
15 85 Voeuk A, Nekolaichuk C, Fainsinger R, Huot A. Continuous palliative sedation for  
16 existential distress? A survey of Canadian palliative care physicians' views. *J Palliat Care*.  
17 2017;32(1):26-33.  
18  
19 86 Lo B. Beyond legalization — dilemmas physicians confront regarding aid in dying. *N Engl*  
20 *J Med*. 2018;378(22):2060-2.  
21  
22 87 Rao JK, Anderson LA, Lin FC, Laux JP. Completion of advance directives among US  
23 consumers. *American Journal of Preventive Medicine*. 2014;46(1):65-70.  
24  
25 88 McDonald JC, Du Manoir JM, Kevork N, Le LW, Zimmermann C. Advance directives in  
26 patients with advanced cancer receiving active treatment: attitudes, prevalence, and  
27 barriers. *Supportive Care in Cancer*. 2017;25(2):523-31.  
28  
29 89 Selby D, Bean S. Oncologists communicating with patients about assisted dying. *Curr*  
30 *Opin Support Palliat Care*. 2019;13(1):59-63.  
31  
32 90 Boudreau JD, Somerville MA, Biller-Andorno N. Clinical decisions. Physician-assisted  
33 suicide. *N Engl J Med*. 2013;368(15):1450-2.  
34  
35 91 Colbert JA, Schulte J, Adler JN. Physician-assisted suicide—polling results. *N Engl J Med*.  
36 2013;369(11):e15.  
37  
38 92 Miller FG, Appelbaum PS. Physician-Assisted Death for Psychiatric Patients - Misguided  
39 Public Policy. *N Engl J Med*. 2018;378(10):883-885.  
40  
41 93 Hoffman KH, Trawalter S. Assumptions about life hardship and pain perception. *Group*  
42 *Processes & Intergroup Relations* 2016;19(4):493-508.  
43  
44 94 Hoffman KM, Trawalter S, Axt JR, Oliver MN. Racial bias in pain assessment and  
45 treatment recommendations, and false beliefs about biological differences between blacks  
46 and whites. *Proceedings of the National Academy of Sciences*. 2016;113(16):4296-301.  
47  
48 95 Cheek NN, Shafir E. The thick skin heuristic in judgments of distress about people in  
49 poverty. *Behavioural Public Policy* (in press).  
50  
51  
52  
53  
54  
55  
56  
57  
58  
59  
60

- 1  
2  
3 96 Tversky A, Kahneman D. Judgment under uncertainty: heuristics and biases. *Science*.  
4 1974;185(4157):1124-31.  
5  
6 97 Kahneman D, Knetsch JL, Thaler RH. Experimental tests of the endowment effect and the  
7 Coase theorem. *Journal of Political Economy*. 1990;98(6):1325-48.  
8  
9 98 Kahneman D, Knetsch JL, Thaler RH. Anomalies: The endowment effect, loss aversion,  
10 and status quo bias. *Journal of Economic Perspectives*. 1991;5(1):193-206.  
11  
12 99 Mani A, Mullainathan S, Shafir E, Zhao J. Poverty impedes cognitive function. *Science*  
13 2013;341(6149):976-80.  
14  
15 100 Wamala S, Merlo J, Boström G, Hogstedt C. Perceived discrimination, socioeconomic  
16 disadvantage and refraining from seeking medical treatment in Sweden. *J Epidemiol*  
17 *Community Health*. 2007;61(5):409-15.  
18  
19 101 Hausmann LR, Hannon MJ, Kresevic DM, Hanusa BH, Kwok CK, Ibrahim SA. Impact of  
20 perceived discrimination in healthcare on patient-provider communication. *Med Care*.  
21 2011;49(7):626-33.  
22  
23 102 Hoffman KH, Trawalter S. Assumptions about life hardship and pain perception. *Group*  
24 *Processes & Intergroup Relations* 2016;19(4):493-508.  
25  
26 103 Walker AE, Becker NG. Health inequalities across socio-economic groups: comparing  
27 geographic-area-based and individual-based indicators. *Public Health*. 2005;119(12):1097-  
28 104.  
29  
30 104 Yarnell CJ, Fu L, Manuel D, Tanuseputro P, Stukel T, Pinto R, Scales DC, Laupacis A,  
31 Fowler RA. Association between immigrant status and end-of-life care in Ontario, Canada.  
32 *JAMA*. 2017;318(15):1479-1488.  
33  
34 105 Rubens M, Ramamoorthy V, Saxena A, Das S, Appunni S, Rana S, Puebla B, Suarez DT,  
35 Khawand-Azoulai M, Medina S, Viamonte-Ros A. Palliative Care Consultation Trends Among  
36 Hospitalized Patients With Advanced Cancer in the United States, 2005 to 2014. *Am J Hosp*  
37 *Palliat Care*. 2019;36(4):294-301.  
38  
39 106 Dees MK, Vernooij-Dassen MJ, Dekkers WJ, Vissers KC, Van Weel C. 'Unbearable  
40 suffering': a qualitative study on the perspectives of patients who request assistance in  
41 dying. *Journal of Medical Ethics*. 2011;37(12):727-34.  
42  
43 107 Periyakoil VS, Neri E, Kraemer H. Patient-reported barriers to high-quality, end-of-life  
44 care: A multiethnic, multilingual, mixed-methods study. *Journal of Palliative Medicine*.  
45 2016;19(4):373-9.  
46  
47 108 Shafir E. *The behavioral foundations of policy*. Princeton, New Jersey: Princeton  
48 University Press, 2013.  
49  
50  
51  
52  
53  
54  
55  
56  
57  
58  
59  
60

1  
2  
3 109 Cameron BL, Carmargo Plazas Mdel P, Salas AS, Bourque Bearskin RL, Hungler K.  
4 Understanding inequalities in access to health care services for aboriginal people: a call for  
5 nursing action. *ANS Adv Nurs Sci*. 2014;37(3):E1-E16.

6  
7 110 Dickman SL, Himmelstein DU, Woolhandler S. Inequality and the health-care system in  
8 the USA. *The Lancet*. 2017;389(10077):1431-41.

9  
10 111 Bailey ZD, Krieger N, Agénor M, Graves J, Linos N, Bassett MT. Structural racism and  
11 health inequities in the USA: evidence and interventions. *The Lancet*.  
12 2017;389(10077):1453-63.

13  
14 112 Bor J, Cohen GH, Galea S. Population health in an era of rising income inequality: USA,  
15 1980–2015. *The Lancet*. 2017;389(10077):1475-90.

16  
17 113 Yang YT, Curlin FA. Why physicians should oppose assisted suicide. *JAMA*.  
18 2016;315(3):247-8.

19  
20 114 Lerner BH, Caplan AL. Euthanasia in Belgium and the Netherlands: on a slippery slope?  
21 *JAMA Internal Medicine*. 2015;175(10):1640-1.

22  
23 115 Noble B. Legalising assisted dying puts vulnerable patients at risk and doctors must  
24 speak up. *BMJ Support Palliat Care*. 2013;3(3):298-9.

25  
26 116 Hadro M. How assisted suicide discriminates against the poor and disabled. Catholic  
27 News Agency. February 28, 2017.  
28 Available from: [https://www.catholicnewsagency.com/news/how-assisted-suicide-](https://www.catholicnewsagency.com/news/how-assisted-suicide-discriminates-against-the-poor-and-disabled-57444)  
29 [discriminates-against-the-poor-and-disabled-57444](https://www.catholicnewsagency.com/news/how-assisted-suicide-discriminates-against-the-poor-and-disabled-57444)

30  
31 117 Vivas L, Bastien P. Expanding MAiD criteria could irreversibly harm the most  
32 vulnerable. *Health Debate*. January 17, 2020. Available from:  
33 <https://healthydebate.ca/opinions/maid-harm-vulnerable-response>  
34  
35  
36  
37  
38  
39  
40  
41  
42  
43  
44  
45  
46  
47  
48  
49  
50  
51  
52  
53  
54  
55  
56  
57  
58  
59  
60

Figure 1. Frequency of Medical Assistance in Dying



### Footnotes

Plot shows frequency of receiving medical assistance in dying among patients receiving palliative care who have different socioeconomic status. X-axis denotes quintiles of socioeconomic status spanning from lowest to highest. Y-axis denotes frequency of receiving medical assistance in dying. Solid circles indicate estimate and vertical bars indicate 95% confidence interval. Square brackets denote total patients in each analysis. P-value indicates trend. Results suggest gradient where patients with lowest socioeconomic status are less likely to receive medical assistance in dying than patients with highest socioeconomic status.

Figure 2. Consistent Reductions across Subgroups

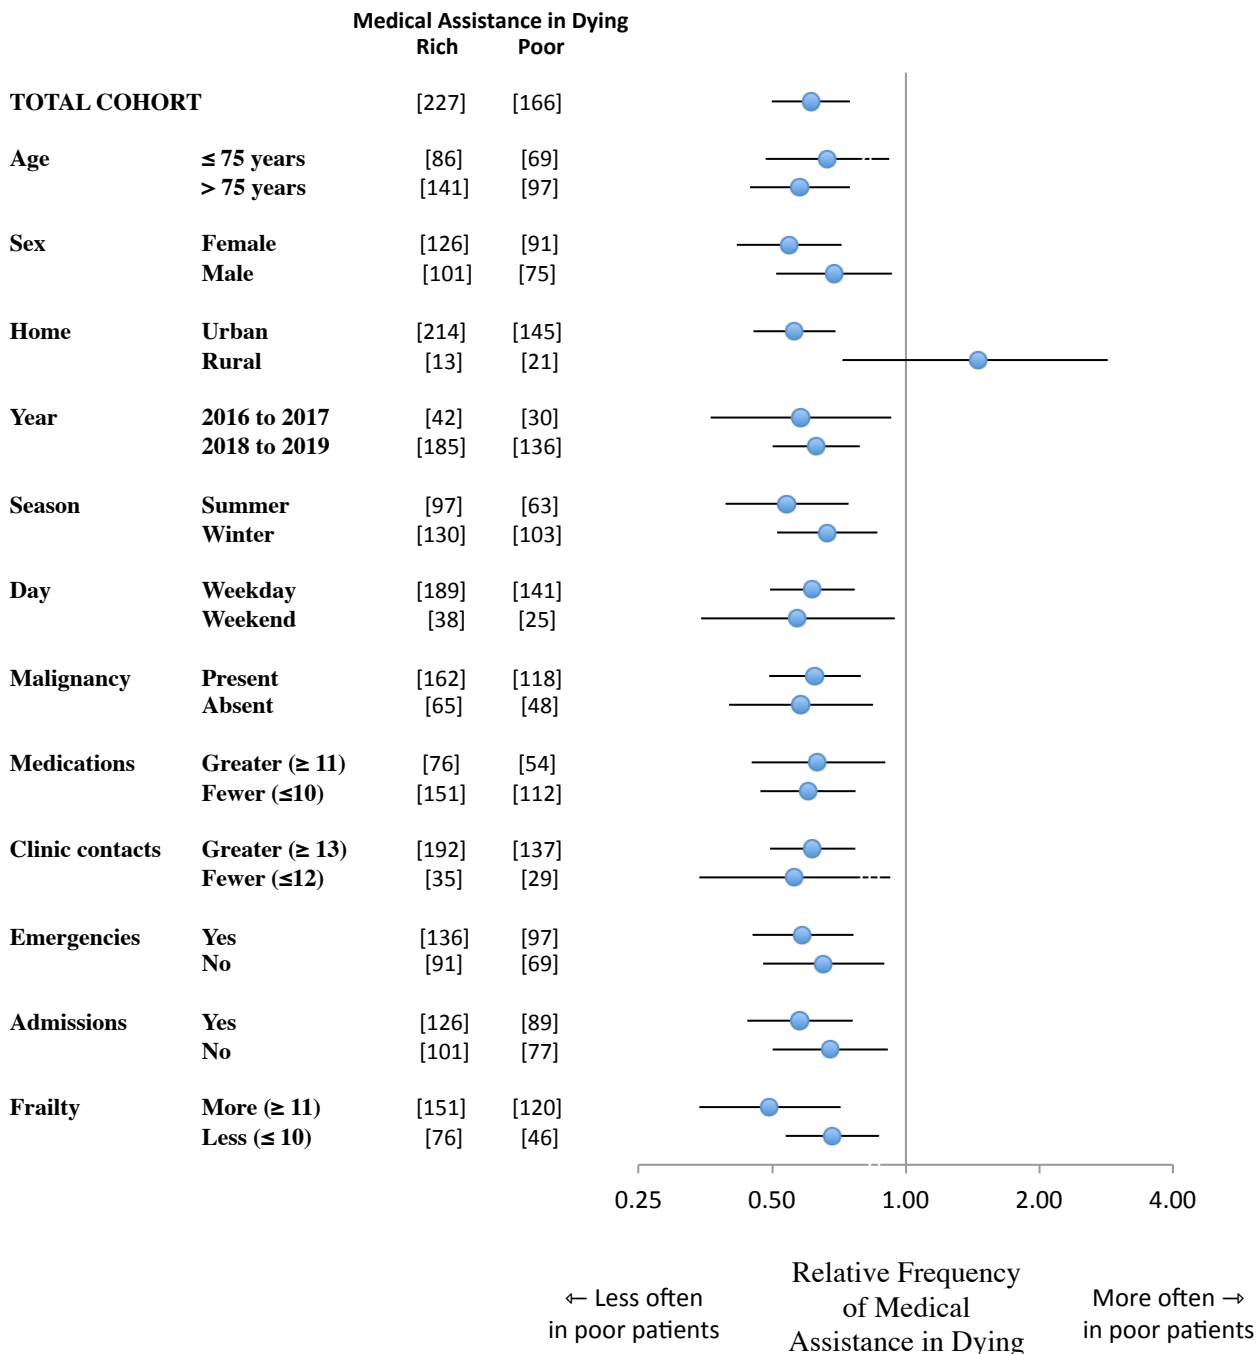

**Footnotes**

Forest plot of relative frequency of receiving medical assistance in dying in different subgroups. Each analysis compares patients in lowest socioeconomic quintile to patients in highest socioeconomic quintile. Circles denote estimate and horizontal lines denote 95% confidence interval. Vertical line shows perfect equity. Square brackets show count of patients in each subgroup. Summary analysis for total cohort positioned at top. Findings show generally reduced frequency of medical assistance in dying for patients with low socioeconomic status (exception subgroup of rural home location attributable to chance).

Figure 3. Perceptions of Patient Suffering

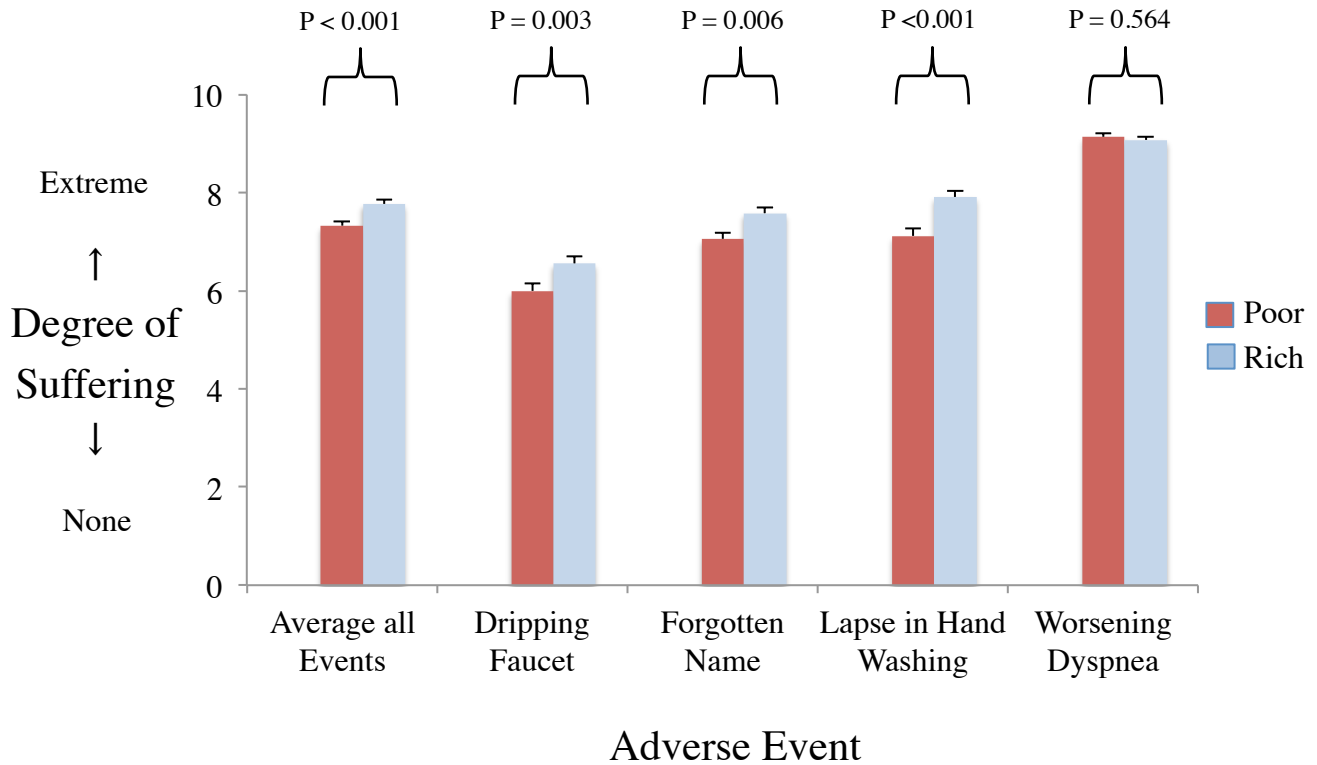

### Footnotes

Plot shows mean ratings of patient suffering from survey of clinicians (n = 494). X-axis denotes average of all adverse events and the four specific components (dripping faucet making noise, forgetting patient name despite being in hospital for days, failures of hand washing when entering room, and worsening dyspnea). Y-axis denotes mean ratings of patient suffering. Red bars for survey describing a poor patient. Blue bars for survey describing a rich patient. Vertical beams denote standard errors. P-values compare mean ratings of same adverse event. Results show significantly lower mean ratings of suffering in the poor version than rich version (exception of dyspnea).



# Appendix §1. Wording of Different Survey Versions

## Rich Version

## Poor Version

### END OF LIFE SUFFERING

Mr. FR is a 75-year-old man. He is rich, has led a life of comfort, and knows real luxury. He is admitted for a hip fracture that is newly-diagnosed as metastatic pancreatic cancer. He declines surgery and, instead, is thinking of Medical Assistance in Dying. He believes this is a grievous situation where suffering and death are foreseeable. Rate the following 4 events for their potential impact on his symptoms. (Circle one for each)

#1: FR notices the nurses never remember his name even though he has been in hospital for days. How much worse do you think this makes him feel?

0-----1-----2-----3-----4-----5-----6-----7-----8-----9-----10  
No Suffering Extreme Suffering

#2: FR has a bathroom sink in his room, but the faucet is leaky and constantly making a dripping noise. How much worse do you think this makes him feel?

0-----1-----2-----3-----4-----5-----6-----7-----8-----9-----10  
No Suffering Extreme Suffering

#3: FR has a large surgery team and often sees them fail to wash their hands when entering his room. How much worse do you think this makes him feel?

0-----1-----2-----3-----4-----5-----6-----7-----8-----9-----10  
No Suffering Extreme Suffering

#4: FR has worsening dyspnea and can no longer enjoy talking by phone with his granddaughter. How much worse do you think this makes him feel?

0-----1-----2-----3-----4-----5-----6-----7-----8-----9-----10  
No Suffering Extreme Suffering

### END OF LIFE SUFFERING

Mr. FR is a 75-year-old man. He is poor, has led a life of troubles, and knows real hardship. He is admitted for a hip fracture that is newly-diagnosed as metastatic pancreatic cancer. He declines surgery and, instead, is thinking of Medical Assistance in Dying. He believes this is a grievous situation where suffering and death are foreseeable. Rate the following 4 events for their potential impact on his symptoms. (Circle one for each)

#1: FR notices the nurses never remember his name even though he has been in hospital for days. How much worse do you think this makes him feel?

0-----1-----2-----3-----4-----5-----6-----7-----8-----9-----10  
No Suffering Extreme Suffering

#2: FR has a bathroom sink in his room, but the faucet is leaky and constantly making a dripping noise. How much worse do you think this makes him feel?

0-----1-----2-----3-----4-----5-----6-----7-----8-----9-----10  
No Suffering Extreme Suffering

#3: FR has a large surgery team and often sees them fail to wash their hands when entering his room. How much worse do you think this makes him feel?

0-----1-----2-----3-----4-----5-----6-----7-----8-----9-----10  
No Suffering Extreme Suffering

#4: FR has worsening dyspnea and can no longer enjoy talking by phone with his granddaughter. How much worse do you think this makes him feel?

0-----1-----2-----3-----4-----5-----6-----7-----8-----9-----10  
No Suffering Extreme Suffering

### Footnotes

Textbox showing exact wording of survey with rich version on left and poor version on right. Each respondent saw a single version. Sole difference between the two versions appears in the second sentence describing the patient as either rich or poor.

The design was specified in advanced based on earlier surveys conducted on lay people and professionals in non-healthcare settings (Cheek & Shafir, 2020). The survey offered limited clinical information and emphasized the primary distinction under investigation; namely, the patient's socioeconomic status.

The survey was pre-randomized using a computerized random number generator. The stack of surveys was then allocated in a face-down procedure to maintain concealment from the administrator. Potential respondents were medical staff identified by a tag worn around the neck or on a uniform who visited the hospital's coffee shop during the day.

The cohort was largely composed of nurses, doctors, or allied healthcare professionals and not necessarily representative of community-based practitioners. Participants were approached by a medical student unaware of clinical backgrounds to avoid targeting or excluding individuals with palliative care training. Specialization was unknown and none were disqualified from participation.

A total of 500 surveys were originally printed (250 each with the poor and rich versions), 6 reserved for pilot testing, and the remaining 494 distributed to participants. The consent rate approached 70% (refusals not tracked) and the completion rate was 100% (no faulty or incomplete responses). Surveys required about 1 minute for a participant to complete.

## Appendix §2. Prior Diagnoses

|                                                   | Medical Assistance in Dying (n = 920) | Palliative Care Patients (n = 49,176) |
|---------------------------------------------------|---------------------------------------|---------------------------------------|
| <b>Malignancy Diagnosis</b>                       |                                       |                                       |
| Mouth, ear, nose, throat                          | 24 (3)                                | 1,699 (3)                             |
| Digestive tract                                   | 239 (26)                              | 12,327 (25)                           |
| Respiratory tract                                 | 205 (22)                              | 11,317 (23)                           |
| Muskuloskeletal, skin, breast                     | 151 (16)                              | 8,387 (17)                            |
| Genitourinary tract                               | 174 (19)                              | 9,065 (18)                            |
| Neurologic tract                                  | 62 (7)                                | 3,177 (6)                             |
| Miscellaneous                                     | 360 (39)                              | 21,058 (43)                           |
| Hematologic                                       | 58 (6)                                | 4,498 (9)                             |
| <b>Non-Malignancy Diagnosis</b>                   |                                       |                                       |
| Parkinson's disease or other CNS illness          | 158 (17)                              | 6,388 (13)                            |
| Stroke or other CNS vascular event                | 76 (8)                                | 7,243 (15)                            |
| Concussion or other CNS trauma                    | 64 (7)                                | 1,327 (3)                             |
| Myasthenia gravis or other myo-neuropathy         | 189 (21)                              | 15,332 (31)                           |
| Congestive heart failure or other cardiac illness | 332 (36)                              | 22,836 (46)                           |
| Pulmonary fibrosis or other lung illness          | 351 (38)                              | 22,684 (46)                           |
| Cirrhosis or other liver failure                  | 50 (5)                                | 3,533 (7)                             |
| Uremia or other kidney failure                    | 77 (8)                                | 9,214 (19)                            |
| <b>Active Comorbidity</b>                         |                                       |                                       |
| Hypertension                                      | 169 (18)                              | 12,050 (25)                           |
| Acid reflux                                       | 101 (11)                              | 6,333 (13)                            |
| Diabetes                                          | 99 (11)                               | 10,994 (22)                           |
| Anemia                                            | 86 (9)                                | 8,083 (16)                            |
| Glaucoma                                          | 112 (12)                              | 4,381 (9)                             |
| Anxiety                                           | 209 (23)                              | 10,083 (21)                           |
| Depression                                        | 50 (5)                                | 2,075 (4)                             |

Footnotes

data are count (percentage) of each column

data sum to above 100% due to patients having more than 1 diagnosis

diagnoses based on ICD9 codes extracted from outpatient records in year before death

CNS denotes Central Nervous System

## Appendix §3. Prior Medications

|                                           | Medical Assistance<br>in Dying<br>(n = 920) | Palliative<br>Care<br>Patients<br>(n = 49,176) |
|-------------------------------------------|---------------------------------------------|------------------------------------------------|
| Specific Medication in Last Month of Life |                                             |                                                |
| Opioid                                    | 587 (64)                                    | 24,455 (50)                                    |
| Beta blocker                              | 119 (13)                                    | 8,247 (17)                                     |
| Calcium blocker                           | 71 (8)                                      | 5,222 (11)                                     |
| Acid suppressor                           | 284 (31)                                    | 14,679 (30)                                    |
| Diabetes medication                       | 30 (3)                                      | 3,866 (8)                                      |
| Statin                                    | 75 (8)                                      | 6,570 (13)                                     |
| Inhaled bronchodilator                    | 51 (6)                                      | 2,709 (6)                                      |
| Glaucoma medication                       | 34 (4)                                      | 1,472 (3)                                      |
| Benzodiazepine                            | 405 (44)                                    | 16,311 (33)                                    |
| Antidepressant                            | 225 (24)                                    | 10,841 (22)                                    |

Footnotes

data are count (percentage) of each column

data sum to above 100% due to patients having more than 1 medication

medications based on DIN codes extracted from outpatient records in month before death

STROBE Statement—Checklist of items that should be included in reports of *case-control studies*

|                              | <b>Item No</b> | <b>Recommendation</b>                                                                                                                                                                              | <b>Page Number</b> |
|------------------------------|----------------|----------------------------------------------------------------------------------------------------------------------------------------------------------------------------------------------------|--------------------|
| <b>Title and abstract</b>    | 1              | (a) Indicate the study's design with a commonly used term in the title or the abstract                                                                                                             | 1                  |
|                              |                | (b) Provide in the abstract an informative and balanced summary of what was done and what was found                                                                                                | 2                  |
| <b>Introduction</b>          |                |                                                                                                                                                                                                    |                    |
| Background/rationale         | 2              | Explain the scientific background and rationale for the investigation being reported                                                                                                               | 4                  |
| Objectives                   | 3              | State specific objectives, including any prespecified hypotheses                                                                                                                                   | 4                  |
| <b>Methods</b>               |                |                                                                                                                                                                                                    |                    |
| Study design                 | 4              | Present key elements of study design early in the paper                                                                                                                                            | 5                  |
| Setting                      | 5              | Describe the setting, locations, and relevant dates, including periods of recruitment, exposure, follow-up, and data collection                                                                    | 5-7                |
| Participants                 | 6              | (a) Give the eligibility criteria, and the sources and methods of case ascertainment and control selection. Give the rationale for the choice of cases and controls                                | 5-7                |
|                              |                | (b) For matched studies, give matching criteria and the number of controls per case                                                                                                                | 7                  |
| Variables                    | 7              | Clearly define all outcomes, exposures, predictors, potential confounders, and effect modifiers. Give diagnostic criteria, if applicable                                                           | 5-7                |
| Data sources/<br>measurement | 8*             | For each variable of interest, give sources of data and details of methods of assessment (measurement). Describe comparability of assessment methods if there is more than one group               | 5-7                |
| Bias                         | 9              | Describe any efforts to address potential sources of bias                                                                                                                                          | 6-7                |
| Study size                   | 10             | Explain how the study size was arrived at                                                                                                                                                          | 5                  |
| Quantitative variables       | 11             | Explain how quantitative variables were handled in the analyses. If applicable, describe which groupings were chosen and why                                                                       | 6-7                |
| Statistical methods          | 12             | (a) Describe all statistical methods, including those used to control for confounding                                                                                                              | 6-7                |
|                              |                | (b) Describe any methods used to examine subgroups and interactions                                                                                                                                | 6-7                |
|                              |                | (c) Explain how missing data were addressed                                                                                                                                                        | 5                  |
|                              |                | (d) If applicable, explain how matching of cases and controls was addressed                                                                                                                        | 7                  |
|                              |                | (e) Describe any sensitivity analyses                                                                                                                                                              | 6-7                |
| <b>Results</b>               |                |                                                                                                                                                                                                    |                    |
| Participants                 | 13*            | (a) Report numbers of individuals at each stage of study— eg numbers potentially eligible, examined for eligibility, confirmed eligible, included in the study, completing follow-up, and analysed | 8                  |

|                          |     |                                                                                                                                                                                                              |       |
|--------------------------|-----|--------------------------------------------------------------------------------------------------------------------------------------------------------------------------------------------------------------|-------|
|                          |     | (b) Give reasons for non-participation at each stage                                                                                                                                                         | 8     |
|                          |     | (c) Consider use of a flow diagram                                                                                                                                                                           |       |
| Descriptive data         | 14* | (a) Give characteristics of study participants (eg demographic, clinical, social) and information on exposures and potential confounders                                                                     | 8     |
|                          |     | (b) Indicate number of participants with missing data for each variable of interest                                                                                                                          | 8     |
| Outcome data             | 15* | Report numbers in each exposure category, or summary measures of exposure                                                                                                                                    | 8-10  |
| Main results             | 16  | (a) Give unadjusted estimates and, if applicable, confounder-adjusted estimates and their precision (eg, 95% confidence interval). Make clear which confounders were adjusted for and why they were included | 8-10  |
|                          |     | (b) Report category boundaries when continuous variables were categorized                                                                                                                                    | 8-10  |
|                          |     | (c) If relevant, consider translating estimates of relative risk into absolute risk for a meaningful time period                                                                                             | 8-10  |
| Other analyses           | 17  | Report other analyses done—eg analyses of subgroups and interactions, and sensitivity analyses                                                                                                               | 8-10  |
| <b>Discussion</b>        |     |                                                                                                                                                                                                              |       |
| Key results              | 18  | Summarise key results with reference to study objectives                                                                                                                                                     | 10-11 |
| Limitations              | 19  | Discuss limitations of the study, taking into account sources of potential bias or imprecision. Discuss both direction and magnitude of any potential bias                                                   | 12    |
| Interpretation           | 20  | Give a cautious overall interpretation of results considering objectives, limitations, multiplicity of analyses, results from similar studies, and other relevant evidence                                   | 11-12 |
| Generalisability         | 21  | Discuss the generalisability (external validity) of the study results                                                                                                                                        | 11-12 |
| <b>Other information</b> |     |                                                                                                                                                                                                              |       |
| Funding                  | 22  | Give the source of funding and the role of the funders for the present study and, if applicable, for the original study on which the present article is based                                                | 13    |

1  
2  
3  
4 \*Give information separately for cases and controls.  
5  
6

7 **Note:** An Explanation and Elaboration article discusses each checklist item and gives methodological background and  
8 published examples of transparent reporting. The STROBE checklist is best used in conjunction with this article (freely  
9 available on the Web sites of PLoS Medicine at <http://www.plosmedicine.org/>, Annals of Internal Medicine at  
10 <http://www.annals.org/>, and Epidemiology at <http://www.epidem.com/>). Information on the STROBE Initiative is  
11 available at <http://www.strobe-statement.org>.  
12  
13  
14  
15  
16  
17  
18  
19  
20  
21  
22  
23  
24  
25  
26  
27  
28  
29  
30  
31  
32  
33  
34  
35  
36  
37  
38  
39  
40  
41  
42  
43  
44  
45  
46  
47  
48  
49  
50  
51  
52  
53  
54  
55  
56  
57  
58  
59  
60

# BMJ Open

## Association of Socioeconomic Status with Medical Assistance in Dying: A Case Control Analysis

|                                 |                                                                                                                                                                                                                                                                                                                                                                                                                                                               |
|---------------------------------|---------------------------------------------------------------------------------------------------------------------------------------------------------------------------------------------------------------------------------------------------------------------------------------------------------------------------------------------------------------------------------------------------------------------------------------------------------------|
| Journal:                        | <i>BMJ Open</i>                                                                                                                                                                                                                                                                                                                                                                                                                                               |
| Manuscript ID                   | bmjopen-2020-043547.R2                                                                                                                                                                                                                                                                                                                                                                                                                                        |
| Article Type:                   | Original research                                                                                                                                                                                                                                                                                                                                                                                                                                             |
| Date Submitted by the Author:   | 07-Apr-2021                                                                                                                                                                                                                                                                                                                                                                                                                                                   |
| Complete List of Authors:       | Redelmeier, Donald; University of Toronto Faculty of Medicine, Medicine; Sunnybrook Research Institute, Evaluative Clinical Sciences<br>Ng, Kelvin; University of Toronto; Sunnybrook Research Institute, Evaluative Clinical Sciences<br>Thiruchelvam, Deva; Institute for Clinical Evaluative Sciences; Sunnybrook Research Institute, Evaluative Clinical Sciences<br>Shafir, Eldar; Princeton University, Public Policy; Princeton University, Psychology |
| <b>Primary Subject Heading</b>: | Palliative care                                                                                                                                                                                                                                                                                                                                                                                                                                               |
| Secondary Subject Heading:      | Health services research                                                                                                                                                                                                                                                                                                                                                                                                                                      |
| Keywords:                       | Rationing < HEALTH SERVICES ADMINISTRATION & MANAGEMENT, Cancer pain < ONCOLOGY, Adult palliative care < PALLIATIVE CARE, PRIMARY CARE, Health policy < HEALTH SERVICES ADMINISTRATION & MANAGEMENT                                                                                                                                                                                                                                                           |
|                                 |                                                                                                                                                                                                                                                                                                                                                                                                                                                               |

SCHOLARONE™  
Manuscripts



I, the Submitting Author has the right to grant and does grant on behalf of all authors of the Work (as defined in the below author licence), an exclusive licence and/or a non-exclusive licence for contributions from authors who are: i) UK Crown employees; ii) where BMJ has agreed a CC-BY licence shall apply, and/or iii) in accordance with the terms applicable for US Federal Government officers or employees acting as part of their official duties; on a worldwide, perpetual, irrevocable, royalty-free basis to BMJ Publishing Group Ltd ("BMJ") its licensees and where the relevant Journal is co-owned by BMJ to the co-owners of the Journal, to publish the Work in this journal and any other BMJ products and to exploit all rights, as set out in our [licence](#).

The Submitting Author accepts and understands that any supply made under these terms is made by BMJ to the Submitting Author unless you are acting as an employee on behalf of your employer or a postgraduate student of an affiliated institution which is paying any applicable article publishing charge ("APC") for Open Access articles. Where the Submitting Author wishes to make the Work available on an Open Access basis (and intends to pay the relevant APC), the terms of reuse of such Open Access shall be governed by a Creative Commons licence – details of these licences and which [Creative Commons](#) licence will apply to this Work are set out in our licence referred to above.

Other than as permitted in any relevant BMJ Author's Self Archiving Policies, I confirm this Work has not been accepted for publication elsewhere, is not being considered for publication elsewhere and does not duplicate material already published. I confirm all authors consent to publication of this Work and authorise the granting of this licence.



1  
2  
3 Association of Socioeconomic Status with Medical Assistance in Dying:  
4  
5 A Case Control Analysis  
6  
7  
8  
9

10  
11 Donald A. Redelmeier, MD FRCPC MSHSR FACP [1, 2, 3, 4, 5]  
12

13 Kelvin Ng, BA [1, 2]  
14

15 Deva Thiruchelvam, MSc [2, 3]  
16

17 Eldar Shafir PhD [6, 7]  
18  
19  
20

21 [1] Department of Medicine, University of Toronto

22 [2] Evaluative Clinical Sciences Program, Sunnybrook Research Institute

23 [3] Institute for Clinical Evaluative Sciences

24 [4] Division of General Internal Medicine, Sunnybrook Health Sciences Centre

25 [5] Center for Leading Injury Prevention Practice Education & Research

26 [6] Department of Psychology, Princeton University

27 [7] Princeton School of Public and International Affairs  
28  
29  
30

31  
32 Correspondence: Donald A. Redelmeier

33 Sunnybrook Health Sciences Centre, G-151

34 2075 Bayview Ave,

35 Toronto, Ontario, CANADA M4N 3M5

36 voice: (416) 480-6999 fax: (416) 480-6048

37 e.mail: dar@ices.on.ca  
38  
39  
40

41 Running Title: Medical Assistance in Dying  
42  
43

44 Key Words: clinical reasoning; behavioral economics; compassionate care;  
45 assisted suicide; social inequities; patient empathy  
46  
47

48 Word Count: 2,759  
49  
50  
51  
52  
53  
54  
55  
56  
57  
58  
59  
60

## 1 ABSTRACT

2  
3  
4 Objectives: Economic constraints are a common explanation for why patients with low socioeconomic status tend to experience less  
5 access to medical care. We tested whether the decreased care extends to medical assistance in dying in a healthcare system with no  
6 direct economic constraints.  
7

8  
9  
10 Design: Population-based case-control study of adults who died.

11  
12 Setting: Ontario, Canada, between June 1, 2016 and June 1, 2019.

13  
14  
15 Patients: Patients receiving palliative care under universal insurance with no user fees.

16  
17 Exposure: Patient's socioeconomic status identified using standardized quintiles.

18  
19  
20 Main Outcome Measure: Whether the patient received medical assistance in dying.

21  
22 Results: A total of 50,096 palliative care patients died, of whom 920 received medical assistance in dying (cases) and 49,176  
23 did not receive medical assistance in dying (controls). Medical assistance in dying was less frequent for patients with low  
24 socioeconomic status (166 of 11,008 = 1.5%) than for patients with high socioeconomic status (227 of 9,277 = 2.4%).  
25 This equaled a 39% decreased odds of receiving medical assistance in dying associated with low socioeconomic status (odds ratio  
26 = 0.61, 95% confidence interval 0.50 to 0.75,  $p < 0.001$ ). The relative decrease was evident across diverse patient groups  
27 and after adjusting for age, sex, home location, malignancy diagnosis, healthcare utilization, and overall frailty. The findings also  
28 replicated in a subgroup analysis that matched patients on responsible physician, a sensitivity analysis based on a different  
29 socioeconomic measure of low-income status, and a confirmation study using a randomized survey design.  
30  
31

32  
33  
34  
35  
36  
37 Conclusions: Patients with low socioeconomic status are less likely to receive medical assistance in dying under universal health  
38 insurance. An awareness of this imbalance may help in understanding patient decisions in less extreme clinical settings.  
39  
40  
41  
42  
43  
44  
45  
46  
47  
48  
49  
50  
51  
52  
53  
54  
55  
56  
57  
58  
59  
60

## ARTICLE SUMMARY

Strengths & Limitations

Comprehensive analysis of palliative care patients who died in Canada's largest region assessing socioeconomic inequities around medical assistance in dying.

Detailed statistics adjusting for observed factors, secondary analyses matching on exact responsible physician, and additional confirmation survey testing for unmeasured factors.

Study limitations are inevitable since a randomized trial of medical assistance in dying is not ethical, feasible, or realistic.

Further limitations include the fallibility of estimating socioeconomic status that generally yields analyses that underestimate the magnitude of inequities.

Additional limitations involve interpretation of inequities because socioeconomic status is intertwined with patient preferences, communication patterns, or implicit bias.

## INTRODUCTION

Medical assistance in dying is free and legal in Canada.<sup>1</sup> An eligible patient must have a grievous and irremediable disease that causes intolerable suffering where death is reasonably foreseeable.<sup>2</sup> The common indications are metastatic cancer or a progressive neurologic illness.<sup>3</sup> Additional requirements include informed consent, second physician verification, attestation from impartial witnesses, and an interval for reflection.<sup>4</sup> These requirements are designed to avoid thoughtless impulsivity or interpersonal pressures. The protocol involves a series of medications including midazolam, propofol, and rocuronium.<sup>5</sup> Rates of medical assistance in dying vary substantially by region and currently average over 5,000 per year nationally.<sup>6 7</sup> Each case hinges on the concept of compassionate care for a suffering patient.

Socioeconomic status influences medical care in many situations. For example, poor patients relative to rich patients tend to be undertreated in a publicly-funded colon-cancer screening program.<sup>8</sup> To compensate, recommendations to provide care for poor patients have been fundamental in the practice of medicine since antiquity with persistent advocacy to treat those in most need.<sup>9 10 11 12 13</sup> Modern strategies to mitigate inequities tend to focus on situational barriers (eg, access to care) or patient factors (eg, life experience or community norms) and have not been fully successful.<sup>14 15</sup> In theory, the causes of socioeconomic inequities can be more complicated because medical treatment also depends on human judgment.

People are prone to pitfalls of reasoning.<sup>16 17</sup> Poor patients, for example, may feel less able to advocate for themselves or more reluctant to express their dissatisfaction.<sup>18 19 20</sup> In addition, clinicians may underestimate the distress experienced by poor patients due to faulty intuitions about a life of hardships (termed the thick-skinned fallacy).<sup>21 22 23</sup> We hypothesized such behavioral pitfalls may have important implications for medical care, thereby leading to unequal patterns of care for poor and for rich patients experiencing a similar serious situation.<sup>24 25</sup> Here we explore how this hypothesis might extend to an extreme condition requiring understanding and communication; namely, medical assistance in dying for a palliative care patient.

## METHODS

### Study Setting

Most Canadian adults strongly support medical assistance in dying, as indicated by national opinion polls conducted in recent years.<sup>26</sup> This support is nearly as strong among poor households (<\$40,000 annual income) and rich households (>\$100,000 annual income).<sup>27</sup> The Supreme Court of Canada ruled on February 6, 2015 that competent Canadian adults have the right to assistance in dying regardless of ability-to-pay and set June 17, 2016 as the implementation date for legalization.<sup>28</sup> Similar to other regions in Canada, medical assistance in dying became a benefit under universal health insurance in Ontario on June 6, 2016.<sup>29 30 31</sup> Ontario is Canada's largest province with a population of 13,448,494 in 2016 (study baseline).<sup>32 33 34</sup>

### Patient Selection

1 We identified older adults (age  $\geq 65$  years) who died under palliative care using valid linked databases.<sup>35 36 37 38</sup> We  
2 included deaths between June 1, 2016 and June 1, 2019 to reflect all years since legalization of medical assistance in dying. We  
3 identified palliative care by physician fees (OHIP code: K023) and required at least two contacts in the last month of life to ensure  
4 patients had an irremediable condition, death was reasonably foreseeable, and individuals had access to care.<sup>39</sup> Patients who  
5 received medical assistance in dying were identified from specifically defined outpatient pharmacy prescriptions (ODB codes:  
6 93877101 to 93877106).<sup>40</sup> The remaining patients were defined as receiving palliative care without medical assistance in  
7 dying. These stringent selection criteria undercount cases compared to federal data sources.<sup>41</sup>

#### 14 Socioeconomic Status

15 We identified a patient's socioeconomic status based on the Statistics Canada official algorithm using the smallest  
16 population unit available (size about 500 persons).<sup>42 43 44</sup> These estimates reflected home neighborhood location, did not rely on  
17 self-report, and were validated in past research.<sup>45 46 47 48 49</sup> Individuals with missing data (<1%) were assigned to the lowest  
18 quintile to yield a fully comprehensive analysis and more conservative estimates.<sup>50</sup> The purpose of this approach was to avoid  
19 limitations in past research such as small sample sizes, subjective survey responses, volunteer participants, or uncontrolled analyses  
20 of socioeconomic status. The main limitation of our approach was potential random misclassification that would tend to bias  
21 comparisons to the null.<sup>51</sup>

#### 28 General Characteristics

29 Information on patient age, sex, and home location was based on linked demographic databases.<sup>52</sup> Additional linked  
30 healthcare databases were used to identify time of death (season, weekday, year), home location (urban, rural), and past medical  
31 care (clinic contacts, emergency visits, hospital admissions).<sup>53 54</sup> The Johns Hopkins University Adjusted Clinical Groups (ACG)  
32 score was used as an overall index of health status and general frailty.<sup>55 56</sup> Total medications during the final year of life were  
33 obtained using techniques previously validated at the Institute for Clinical Evaluative Sciences.<sup>57 58</sup> The available databases lacked  
34 information on self-identified race, ethnic background, religious affiliation, formal education, advance directives, and death certificate  
35 details.

#### 42 Clinical Characteristics

43 We further scanned linked outpatient medical care databases in the year prior to death to identify serious medical illnesses  
44 with particular attention to malignancy diagnoses (eg, respiratory tract cancer), neurologic diagnoses (eg, Parkinson's disease), and  
45 other life-threatening non-malignant diagnoses (eg, congestive heart failure).<sup>59</sup> Further comorbid conditions included common  
46 chronic diseases (eg, hypertension). Additional psychiatric diagnoses included depression.<sup>60</sup> We also gathered data on specific  
47 medications (eg, opioids).<sup>61</sup> The available databases lacked information on functional status, symptom severity, personal rationales,  
48 family relationships, social supports, cultural traditions, and informal thoughts.

### Statistical Analysis

The primary analysis examined the distribution of socioeconomic status among patients who received medical assistance in dying compared to controls who did not receive medical assistance in dying using an unpaired chi-square test. Logistic regression was used to further quantify associations using odds ratios to adjust for potential imbalances in demographic characteristics (age, sex, home location), health care utilization (prior year), and general frailty (Johns Hopkins ACG index). Logistic regression was also used to explore additional factors correlated with receiving medical assistance in dying. Calculations of attributable risk and attributable fractions were conducted using population-based methods.

We conducted two secondary analyses to validate results. First, we used a pair-matched approach (1-to-1 ratio) to identify similar patients who did and who did not receive medical assistance in dying according to age, sex, home location (urban, rural), and responsible physician (exact name).<sup>62</sup> The association between socioeconomic status and medical assistance in dying was then tested using methods suitable for matched designs.<sup>63 64</sup> Second, a further sensitivity analysis also examined the entire cohort by reclassifying socioeconomic status in a binary manner based on the specific government indicator for a low-income senior (ODB Plan Code R).<sup>65</sup> All analyses followed privacy safeguards at the Institute for Clinical Evaluative Sciences and were conducted using SAS software (version 9.45).

### Confirmation Survey

We conducted an additional randomized survey to indirectly check the association between socioeconomic status and judgments of patient suffering. In line with behavioral findings concerning estimating perceived discomfort among people,<sup>66</sup> the rationale was to explore whether clinicians tend to estimate poor patients as having the same suffering as rich patients in the same situation. The survey contained a single patient scenario formulated in two versions (rich, poor) differing by only one sentence (Appendix §1). The rich version described the patient as having had a lifetime of luxury. The poor version described the patient as having had a lifetime of hardship. The two versions were otherwise the same, randomly assigned to participants, and designed to elicit a clinician's judgment of patient suffering due to psychosocial or biomedical adverse events.<sup>67</sup>

The survey was pre-randomized using a computerized random number generator. The stack of surveys was then allocated one-by-one in a face-down procedure to maintain concealment from the administrator. Survey participants were nurses, doctors, or allied healthcare professionals and not necessarily representative of community-based practitioners. Potential respondents were medical staff identified by a tag worn around the neck or on a uniform who visited the hospital's coffee shop during the day. Individuals were approached by a medical student unaware of clinical backgrounds to avoid targeting or excluding individuals with palliative care training. Surveys required about 1 minute to complete and refusals were not tracked. Specialization was unknown and no individuals were disqualified from participation.

### Patient and Public Involvement

Patients or the public were not involved in the design, conduct, reporting, or dissemination plans of our research.

## RESULTS

### Baseline Characteristics

During the three-year interval a total of 243,880 deaths were identified, of whom 50,096 received palliative care in the last month of life. Overall, 920 patients received medical assistance in dying and 49,176 controls did not receive medical assistance in dying (Table 1). The two groups were similar except those who received medical assistance in dying were slightly more frequent in the later half of the study, relatively more likely to die on a weekday, and somewhat less frail. The typical patient in both groups had a median age of 81 years, was diagnosed with a malignancy, and lived in a city. Three-quarters (72%, n = 36,274) were admitted to hospital in the year before dying and two-thirds (65%, n = 32,312) had an emergency visit in the year before dying.

\*\*\* Table 1 About Here \*\*\*

Table 1. Patient Characteristics

|                                   |            | Medical Assistance in Dying (n = 920) | Palliative Control Patients (n = 49,176) |
|-----------------------------------|------------|---------------------------------------|------------------------------------------|
| Age                               | ≤ 75 years | 338 (37)                              | 15,211 (31)                              |
|                                   | > 75 years | 582 (63)                              | 33,965 (69)                              |
| Sex                               | Female     | 484 (53)                              | 24,826 (50)                              |
|                                   | Male       | 436 (47)                              | 24,350 (50)                              |
| Home Location *                   | Urban      | 812 (88)                              | 44,758 (91)                              |
|                                   | Rural      | 108 (12)                              | 4,418 (9)                                |
| Year of Death †                   | 2016 - 17  | 207 (23)                              | 21,532 (44)                              |
|                                   | 2018 - 19  | 713 (77)                              | 27,644 (56)                              |
| Season of Year                    | Spring     | 183 (20)                              | 10,958 (22)                              |
|                                   | Summer     | 198 (22)                              | 12,036 (24)                              |
|                                   | Autumn     | 265 (29)                              | 12,991 (26)                              |
|                                   | Winter     | 274 (30)                              | 13,191 (27)                              |
| Day of Death ¶                    | Weekday    | 778 (85)                              | 35,849 (73)                              |
|                                   | Weekend    | 142 (15)                              | 13,327 (27)                              |
| Malignancy Diagnosis #            | Present    | 661 (72)                              | 35,548 (72)                              |
|                                   | Absent     | 259 (28)                              | 13,628 (28)                              |
| Total Medications in Past Month ‡ | Mean       | 9.1 ± 5.3                             | 9.5 ± 6.2                                |
| Clinic Contacts in Past Year      | Mean       | 26.01 ± 16.02                         | 29.29 ± 18.40                            |
| Emergency Visits in Past Year     | Mean       | 1.33 ± 1.64                           | 1.59 ± 2.06                              |
| Admissions in Past Year           | Mean       | 0.93 ± 1.15                           | 1.53 ± 1.53                              |
| Overall Frailty in Past Year §    | Mean       | 8.62 ± 3.75                           | 10.56 ± 3.65                             |

Footnotes

data are count (percentage) except where noted as mean ± standard deviation

\* missing values assigned to rural (n = 109 of 50,096)

† denotes first 18 months (2016–2017) and second 18 months (2018–2019), respectively

¶ Saturday and Sunday denote weekend

# detailed diagnoses appear in Appendix §2

‡ detailed medications appear in Appendix §3

§ based on Johns Hopkins University Ambulatory Care Groups



## Diagnoses and Treatment

Analysis of individual medical records indicated the two groups of patients had a similar burden of disease in the last year of life (Appendix §2). The most frequent specific malignancies were cancers of the respiratory tract and digestive tract. Important additional diagnoses included congestive heart failure and pulmonary fibrosis. Many patients also had additional comorbidities including hypertension, diabetes, and anxiety. A formal diagnosis of depression was rare in both groups. The most common medication in the last month of life was an opioid analgesic (Appendix §3). The two groups had similar prescription profiles except patients who chose medical assistance in dying were somewhat more likely to be treated with an opioid or a benzodiazepine.

## Socioeconomic Status

Medical assistance in dying was proportionately less frequent for patients with low socioeconomic status (166 of 11,008) than patients with high socioeconomic status (227 of 9,277). Stratified analysis showed intermediate findings for patients with intermediate socioeconomic quintiles (Figure 1). Based on the case-control design, this association equaled a 39% reduced frequency of receiving medical assistance in dying associated with low socioeconomic status relative to high socioeconomic status (odds ratio = 0.61, 95% confidence interval 0.50 to 0.75,  $p < 0.001$ ). The discrepancy equated to a net difference of 306 fewer cases of medical assistance in dying than would have been expected if all patients had the pattern of those in the highest socioeconomic quintile.

\*\*\* Figure 1 About Here \*\*\*

## Secondary Analyses of Subgroups

The decreased frequency of receiving medical assistance in dying associated with low socioeconomic status extended to diverse subgroups. The decrease was evident regardless of age and sex (Figure 2). The decrease was observed in the first half and the second half of the study (and regardless of weekday). Similarly, the decrease was observed for those with and those without a malignancy diagnosis. In addition, the decrease extended to patients regardless of healthcare utilization and frailty. No subgroup showed contrary findings except for rural patients (not significant). All subgroups with at least 50 cases showed a statistically significant decreased frequency of medical assistance in dying associated with low socioeconomic status.

\*\*\* Figure 2 About Here \*\*\*

## Additional Predictors

Several other patient characteristics were associated with a decreased frequency of receiving medical assistance in dying (Table 2). Patients older than 75 years were less likely to receive medical assistance in dying than their younger counterparts. Similarly, patients who had relatively more frailty or relatively more hospital admissions were less likely to receive medical assistance

1  
2  
3  
4  
5  
6  
7  
8  
9  
10  
11  
12  
13  
14  
15  
16  
17  
18  
19  
20  
21  
22  
23  
24  
25  
26  
27  
28  
29  
30  
31  
32  
33  
34  
35  
36  
37  
38  
39  
40  
41  
42  
43  
44  
45  
46  
47  
48  
49  
50  
51  
52  
53  
54  
55  
56  
57  
58  
59  
60

in dying. In contrast, sex, home location, clinic contacts, and emergency department visits were not significantly associated with medical assistance in dying. Accounting for all characteristics suggested that low socioeconomic status was associated with a 37% decreased frequency of receiving medical assistance in dying (odds ratio = 0.63, 95% confidence interval 0.51 to 0.77,  $p < 0.001$ ).

\*\*\* Table 2 About Here \*\*\*

For peer review only

Table 2. Predictors of Medical Assistance in Dying

| Variable                        | BASIC ANALYSIS * |                     | ADJUSTED ANALYSIS † |                     |
|---------------------------------|------------------|---------------------|---------------------|---------------------|
|                                 | Relative Risk    | Confidence Interval | Relative Risk       | Confidence Interval |
| Income Quintile ‡               | 0.61             | 0.50 to 0.75        | 0.63                | 0.51 to 0.77        |
| Age > 75 Years                  | 0.77             | 0.67 to 0.88        | 0.71                | 0.62 to 0.82        |
| Male Sex                        | 0.92             | 0.81 to 1.05        | 0.97                | 0.85 to 1.11        |
| Rural Home Location §           | 1.35             | 1.10 to 1.65        | 1.16                | 0.94 to 1.43        |
| Malignancy Diagnosis ¶          | 0.98             | 0.85 to 1.13        | 0.99                | 0.98 to 1.01        |
| Total Medications ^             | 1.00             | 1.00 to 1.01        | 1.02                | 1.01 to 1.02        |
| Clinic Contacts in Past Year ^  | 0.99             | 0.98 to 0.99        | 0.99                | 0.99 to 1.00        |
| Emergencies in Past Year ^      | 0.93             | 0.89 to 0.96        | 1.01                | 0.97 to 1.05        |
| Admissions in Past Year ^       | 0.69             | 0.65 to 0.73        | 0.80                | 0.74 to 0.86        |
| Overall Frailty in Past Year ¶¶ | 0.87             | 0.85 to 0.88        | 0.90                | 0.88 to 0.92        |

Footnotes

\* no adjustment for baseline differences

† adjusted for age, sex, location, malignancy, medications, contacts, emergencies, admissions, frailty

‡ compares lowest to highest quintile

§ referent is urban location

¶ denotes one or more diagnoses

^ covariate coded as a continuous variable

¶¶ defined by Johns Hopkins frailty index

### Matched Analysis

We rechecked results by comparing each patient who received medical assistance in dying with a matched control who did not receive medical assistance in dying and who was treated by the same responsible physician. This yielded 448 matched pairs (n = 896 patients). Overall, the case and matched control had the same socioeconomic status in 26% of pairs (118 of 448), the case had a higher socioeconomic status in 42% of pairs (186 of 448) and the case had a lower socioeconomic status in 32% of pairs (144 of 448). This matched analysis yielded results that overlapped the main analysis and showed a 23% decrease of medical assistance in dying associated with lower socioeconomic status (odds ratio = 0.77, 95% confidence interval 0.62 to 0.96, p = 0.021).

### Alternate Index of Socioeconomic Status

We also retested results by characterizing each individual patient according to whether they were classified by the specific government indicator as a low-income senior. Overall, 8,029 patients were identified as low-income seniors and the remaining 42,067 patients were identified as not low-income seniors. Medical assistance in dying was proportionately less frequent for patients who were low-income seniors (65 of 8,029) than patients who were not low-income seniors (855 of 42,067). This sensitivity analysis yielded results that overlapped the main analysis and showed a 60% decrease of medical assistance in dying among low-income seniors (odds ratio = 0.40, 95% confidence interval 0.31 to 0.51, p < 0.001).

### Confirmation Survey

We surveyed clinicians at a coffee shop inside a leading Canadian hospital that provided medical assistance in dying.<sup>68</sup> Each participant received one version (rich patient or poor patient) of the survey by randomized assignment (Appendix §1). The typical participant was a middle-aged woman with professional training and years of medical experience (n = 494). We found that overall mean judgments of suffering were higher when assessing a rich patient rather than a poor patient in the survey that otherwise contained identical information about an adverse event (7.8 vs 7.3, p < 0.001). This difference in estimated patient suffering extended to each of the three psychosocial adverse events and not the one biomedical adverse event (Figure 3).

\*\*\* Figure 3 About Here \*\*\*

## DISCUSSION

We studied thousands of deaths in Canada and found that medical assistance in dying was significantly less frequent for palliative care patients who had low rather than high socioeconomic status. The imbalance extended through the range of socioeconomic status and was equally strong during initial and later years of the study. The imbalance is not easily attributed to access to care, ability to pay, medical diagnoses, intensity of medications, choice of physician, responsiveness to treatment, public

1 preferences, thoughtless impulsivity, or reciprocal compensation.<sup>69 70 71 72 73</sup> The findings also differ from statistics on suicide  
2 deaths that are higher among poor rather than rich adults.<sup>74</sup> This practice pattern variation is robust and begs for an explanation.  
3  
4  
5

6 Our research supports earlier patterns observed in other countries around medical assistance in dying. In particular,  
7 patients in the United States undergoing legalized assisted dying are more likely to be highly educated and financially secure  
8 compared to the population average.<sup>75 76</sup> Patients in the Netherlands receiving assisted dying are prone to have comparative social,  
9 economic, and educational privileges.<sup>77</sup> Patients in Switzerland who undergo assisted dying tend to live in affluent neighborhoods.<sup>78</sup>  
10  
11  
12  
13  
14  
15  
16  
17  
18  
19  
20  
21  
22  
23  
24  
25  
26  
27  
28  
29  
30  
31  
32  
33  
34  
35  
36  
37  
38  
39  
40  
41  
42  
43  
44  
45

46 Our data suggest the unequal distribution of medical assistance in dying may occur beyond aspects of care related to  
47 cost.<sup>82</sup> One factor could be faulty doctor–patient communication. Poor patients often feel disempowered to advocate for  
48 themselves, have lower trust in a healthcare system, and may have less rapport with clinicians who elicit their preferences.<sup>83 84</sup>  
49 Religion, ethnicity, or another confounder could also contribute if rich patients plan more advance directives or suffer more  
50 existential distress.<sup>85 86 87 88</sup> Another possibility is that clinicians dislike controversy and want to avoid appearing callous towards  
51 the poor.<sup>89</sup> To be sure, our study does not determine the appropriateness of medical assistance in dying and, for many, the choice  
52 is unthinkable.<sup>90 91 92</sup>  
53  
54  
55  
56  
57  
58  
59  
60

61 The observed unequal treatment might also reflect fallible intuition. The thick–skin bias describes a tendency to perceive  
62 individuals of lower income as less distressed by negative events and reflects an implicit belief that repeated hardships lead to  
63 increased tolerance.<sup>93 94 95</sup> Similar to other implicit biases, this error might originate from a common assumption; specifically,  
64 people sometimes adapt to difficult situations, shift their expectations, and increase their tolerance.<sup>96 97 98</sup> The intuition fails,  
65 however, when hardships lead to resignation instead of resiliency. In effect, the chronic stress of poverty might not buffer against  
66 the added challenges from ill health.<sup>99</sup> Such fallible intuitions might add to a paradox of lesser care despite serious clinical needs.<sup>100</sup>  
67  
68  
69  
70  
71  
72  
73  
74  
75  
76  
77  
78  
79  
80  
81  
82  
83  
84  
85  
86  
87  
88  
89  
90  
91  
92  
93  
94  
95  
96  
97  
98  
99  
100  
101  
102

103 Several limitations of our study merit emphasis for future research. Socioeconomic status measures are imperfect, tend to  
104 bias analyses toward the null, and may underestimate disparities in care.<sup>103</sup> In addition, disadvantaged groups tend to access  
105 palliative care less often than privileged groups, thereby causing our study to underestimate upstream socioeconomic barriers ahead  
106 of receiving care.<sup>104 105</sup> We also lacked data on race and patients younger than 65 years, thereby justifying further analyses in  
107 other groups. Medical assistance in dying, itself, has different meanings depending on available alternatives and a patient's own  
108 beliefs.<sup>106 107</sup> The scientific domains of health inequities and of terminal care are, themselves, complex topics often guided by  
109 moral principles rather than behavioral economic analysis.<sup>108 109 110 111 112</sup>  
110  
111  
112

1  
2  
3 Case control analyses are rarely accompanied by a confirmation survey for many reasons. Specifically, surveys are often  
4 fallible due to faulty sampling, imperfect response rates, social desirability bias, careless mistakes, or other artifacts that cause self-  
5 report to diverge from real behavior.<sup>113</sup> In addition, most surveys merely offer a superficial impression of lived reality (such as the  
6 differences between poverty and wealth). The observed discrepancy in medical assistance in dying might be explained by the  
7 observed discrepancy in judged suffering for rich and poor patients; however, other important contributors could remain. The  
8 strength of the confirmation survey was to explore intuitive clinical judgment using a randomized experimental approach.  
9  
10  
11  
12  
13  
14

15 Overall, our data address lingering misconceptions around the medical care implications of the Supreme Court of Canada  
16 decision. First, medical assistance in dying has not led to a large drop in palliative care; instead, rates of palliative care increased  
17 during the study.<sup>114</sup> Second, medical assistance in dying has not become widely popular despite being free and legal; instead, the  
18 practice accounts for fewer than 2% of deaths in palliative care patients.<sup>115</sup> Third, medical assistance in dying has not been  
19 unjustly targeted toward poor patients; instead, wealthy patients are disproportionately involved.<sup>116 117 118</sup> More broadly, the data  
20 might inform patient engagement for less extreme decisions where poor patients might be disempowered or clinicians may feel  
21 disinclined to push.  
22  
23  
24  
25  
26  
27  
28  
29  
30  
31  
32  
33  
34  
35  
36  
37  
38  
39  
40  
41  
42  
43  
44  
45  
46  
47  
48  
49  
50  
51  
52  
53  
54  
55  
56  
57  
58  
59  
60

## FIGURE LEGENDS

Figure 1. Frequency of Medical Assistance in Dying

Plot shows frequency of receiving medical assistance in dying among patients receiving palliative care who have different socioeconomic status. X-axis denotes quintiles of socioeconomic status spanning from lowest to highest. Y-axis denotes frequency of receiving medical assistance in dying. Solid circles indicate estimate and vertical bars indicate 95% confidence interval. Square brackets denote total patients in each analysis. P-value indicates trend. Results suggest gradient where patients with lowest socioeconomic status are less likely to receive medical assistance in dying than patients with highest socioeconomic status.

Figure 2. Consistent Reductions across Subgroups

Forest plot of relative frequency of receiving medical assistance in dying in different subgroups. Each analysis compares patients in lowest socioeconomic quintile to patients in highest socioeconomic quintile. Circles denote estimate and horizontal lines denote 95% confidence interval. Vertical line shows perfect equity. Square brackets show count of patients in each subgroup. Summary analysis for total cohort positioned at top. Findings show generally reduced frequency of medical assistance in dying for patients with low socioeconomic status (exception subgroup of rural home location attributable to chance).

Figure 3. Perceptions of Patient Suffering

Plot shows mean ratings of patient suffering from survey of clinicians (n = 494). X-axis denotes average of all adverse events and the four specific components (dripping faucet making noise, forgetting patient name despite being in hospital for days, failures of hand washing when entering room, and worsening dyspnea). Y-axis denotes mean ratings of patient suffering. Red bars for survey describing a poor patient. Blue bars for survey describing a rich patient. Vertical beams denote standard errors. P-values compare mean ratings of same adverse event. Results show significantly lower mean ratings of suffering in the poor version than rich version (exception of dyspnea).

## ACKNOWLEDGMENTS

We thank Maya Bar-Hillel, Nathan Cheek, Victor Fuchs, Alan Garber, Kevin Imrie, Fizza Manzoor, Dorothy Pringle, Raffi Rush, Michael Schull, Debbie Selby, and Jack Williams for helpful suggestions on specific points. The views expressed are those of the authors and do not necessarily reflect the Ontario Ministry of Health.

## FUNDING

This project was supported by the Alfred P. Sloan Foundation (#2014-6-16), a Canada Research Chair in Medical Decision Sciences (#950-231316), the Canadian Institutes of Health Research (#436011), the National Science Foundation (#SES-1426642), and the Sunnybrook Research Institute Summer Scholarship Award Program (#001).

## CONFLICTS

The funding organizations had no role in the design and conduct of the study; collection, management, analysis, and interpretation of the data; and preparation, review, or approval of the manuscript. All authors have no financial or personal relationships or affiliations that could influence the decisions and work on this manuscript.

## CONTRIBUTORSHIP

The lead author (DAR) wrote the first draft. All authors (DAR, KN, DT, ES) contributed to study design, manuscript preparation, data analysis, results interpretation, critical revisions and final decision to submit. The lead author (DAR) had full access to all the data in the study, takes responsibility for the integrity of the data and is accountable for the accuracy of the analysis.

## APPROVALS

The protocol was approved by the Sunnybrook Research Ethics board and conducted using privacy safeguards at the Institute for Clinical Evaluative Sciences (ID 001). Parts of this material are based on data compiled by CIHI; however, the analyses, conclusions, and statements expressed are those of the authors and not necessarily those of CIHI. We thank IMS Brogan Inc. for use of the Drug Information Database

## DATA SHARING

The de-identified data collected for this study are available in an appendix included at the time of original manuscript submission and also are available following publication for researchers whose proposed use of data has been approved by an independent review committee. The Johns Hopkins ACG© System is available through the Department of Health Policy and Management at the Johns Hopkins University.

## TRANSPARENCY STATEMENT



1 The lead author affirms that the manuscript is an honest accurate and transparent account of the study being reported; that no  
2 important aspects of the study have been omitted; and that any discrepancies from the study as originally planned have been  
3 explained.  
4  
5

#### 6 7 8 ACCOUNTABILITY

9  
10 The lead author (DAR) had full access to all the data in the study, takes responsibility for the integrity of the data, and is  
11 accountable for the accuracy of the analysis.  
12  
13

#### 14 15 DISSEMINATION STATEMENT

16 We plan to disseminate the results to patients and patient organizations.  
17  
18  
19  
20  
21  
22  
23  
24  
25  
26  
27  
28  
29  
30  
31  
32  
33  
34  
35  
36  
37  
38  
39  
40  
41  
42  
43  
44  
45  
46  
47  
48  
49  
50  
51  
52  
53  
54  
55  
56  
57  
58  
59  
60

## REFERENCES

- 1 Nicol J, Tiedemann M. Bill C-14: An Act to amend the Criminal Code and to make related amendments to other Acts (medical assistance in dying). Ottawa: Library of Parliament; 2018. Report No.: 42-1-C14-E.
- 2 Orentlicher D, Pope TM, Rich BA, Physician Aid-in-Dying Clinical Criteria Committee. Clinical criteria for physician aid in dying. *Journal of Palliative Medicine*. 2016;19(3):259-62.
- 3 Wiebe E, Shaw J, Green S, Trouton K, Kelly M. Reasons for requesting medical assistance in dying. *Canadian Family Physician*. 2018;64(9):674-9.
- 4 Li M, Watt S, Escaf M, Gardam M, Heesters A, O'Leary G, Rodin G. Medical assistance in dying—implementing a hospital-based program in Canada. *N Engl J Med*. 2017;376(21):2082-8.
- 5 Rosso AE, Huyer D, Walker A. Analysis of the medical assistance in dying cases in Ontario: understanding the patient demographics of case uptake in Ontario since the Royal Assent and amendments of Bill C-14 in Canada. *Academic Forensic Pathology*. 2017;7(2):263-87.
- 6 Health Canada. Second interim report on medical assistance in dying in Canada. Ottawa: Health Canada; 2017. Report No.: 170252.
- 7 Health Canada. Third interim report on medical assistance in dying in Canada. Ottawa: Health Canada; 2018. Report No.: 180006.
- 8 Buchman S, Rozmovits L, Glazier RH. Equity and practice issues in colorectal cancer screening: Mixed-methods study. *Can Fam Physician*. 2016;62(4):e186-93.
- 9 Jonsen AR. A short history of medical ethics. New York: Oxford University Press; 2000.
- 10 Hart JT. The inverse care law. *The Lancet*. 1971;297(7696):405-12.
- 11 Williamson DL, Stewart MJ, Hayward K, Letourneau N, Makwarimba E, Masuda J, Raine K, Reutter L, Rootman I, Wilson D. Low-income Canadians' experiences with health-related services: implications for health care reform. *Health Policy*. 2006;76(1):106-21.
- 12 Casalino LP. Professionalism and caring for Medicaid patients—the 5% commitment?. *N Engl J Med*. 2013;369(19):1775-7.
- 13 Bump J, Cashin C, Chalkidou K, Evans D, González-Pier E, Guo Y, Holtz J, Htay DT, Levin C, Marten R, Mensah S. Implementing pro-poor universal health coverage. *The Lancet Global Health*. 2016;4(1):e14-6.
- 14 Isaacs SL, Schroeder SA. Class--the ignored determinant of the nation's health. *N Engl J Med*. 2004;351(11):1137-1142.

- 1  
2  
3 15 Bor J, Cohen GH, Galea S. Population health in an era of rising income inequality: USA,  
4 1980–2015. *The Lancet*. 2017;389(10077):1475-90.  
5  
6 16 Redelmeier DA, Rozin P, Kahneman D. Understanding patients' decisions. Cognitive and  
7 emotional perspectives. *JAMA*. 1993;270(1):72-6.  
8  
9 17 Shafir E. [ed]. *The behavioral foundations of public policy*. Princeton, New Jersey:  
10 Princeton University Press, 2013.  
11  
12 18 Mani A, Mullainathan S, Shafir E, Zhao J. Poverty impedes cognitive function. *Science*  
13 2013;341(6149):976-80.  
14  
15 19 Tesarz J, Eich W, Treede RD, Gerhardt A. Altered pressure pain thresholds and increased  
16 wind-up in adult patients with chronic back pain with a history of childhood maltreatment:  
17 a quantitative sensory testing study. *Pain*. 2016;157(8):1799-809.  
18  
19 20 Gerber MM, Frankfurt SB, Contractor AA, Oudshoorn K, Dranger P, Brown LA. Influence of  
20 multiple traumatic event types on mental health outcomes: does count matter? *J*  
21 *Psychopath Behav Assess* 2018;40:645-54.  
22  
23 21 Stebbins J. The Law of Diminishing Returns. *Science*. 1944;99(2571):267-71.  
24  
25 22 Hoffman KM, Trawalter S. Assumptions about life hardship and pain perception. *Group*  
26 *Processes & Intergroup Relations*. 2016;19:493-508.  
27  
28 23 Cheek NN, Shafir E. The thick skin bias in judgments about people in poverty.  
29 *Behavioural Public Policy* 2020;4:1-26.  
30  
31 24 Kahneman D, Tversky A. Prospect theory: an analysis of decision under risk.  
32 *Econometrica* 1979;47:263-92.  
33  
34 25 Mullainathan S, Shafir E. *Scarcity: The new science of having less and how it defines our*  
35 *lives*. New York: Picador; 2014.  
36  
37 26 Attaran A. Unanimity on death with dignity—legalizing physician-assisted dying in  
38 Canada. *N Engl J Med*. 2015;372(22):2080-2.  
39  
40 27 Ipsos Reid. *Eight in Ten Canadians Support Advance Consent to Physician-Assisted*  
41 *Dying*. Toronto: Ipsos Reid; 2016. Available from: [https://www.ipsos.com/en-ca/news-](https://www.ipsos.com/en-ca/news-polls/eight-ten-80-canadians-support-advance-consent-physician-assisted-dying)  
42 [polls/eight-ten-80-canadians-support-advance-consent-physician-assisted-dying](https://www.ipsos.com/en-ca/news-polls/eight-ten-80-canadians-support-advance-consent-physician-assisted-dying)  
43  
44 28 Chochinov HM, Frazee C. Finding a balance: Canada's law on medical assistance in dying.  
45 *The Lancet*. 2016;388(10044):543-5.  
46  
47 29 Ministry of Health and Long Term Care Strategic Policy Branch. *Medical Assistance in*  
48 *Dying*. Ontario: Ministry of Health and Long Term Care; 2016. Available from:  
49 <http://www.health.gov.on.ca/en/pro/programs/ohip/bulletins/4000/bul4670.pdf>  
50  
51  
52  
53  
54  
55  
56  
57  
58  
59

1  
2  
3 30 Ministry of Health and Long Term Care & Ontario Medical Association. OHIP payment for  
4 medical assistance in dying. Ontario: Ministry of Health and Long Term Care; 2018.  
5 Available from: [https://www.oma.org/wp-content/uploads/MAID\\_Billing-Guide-final-](https://www.oma.org/wp-content/uploads/MAID_Billing-Guide-final-18Oct2018.pdf)  
6 [18Oct2018.pdf](https://www.oma.org/wp-content/uploads/MAID_Billing-Guide-final-18Oct2018.pdf)  
7

8  
9 31 Ontario Ministry of Health Ministry of Long Term Care. Medical Assistance in Dying.  
10 Toronto: Government of Ontario, 2018. Available from:  
11 <http://www.health.gov.on.ca/en/pro/programs/maid/>. Accessed on 2021 Jan 10.  
12

13 32 Statistics Canada. Canada at a Glance 2010 - Population [Internet]. 2010 [cited 2019 Mar  
14 17]. Available from: [https://www150.statcan.gc.ca/n1/pub/12-581-x/2010000/pop-](https://www150.statcan.gc.ca/n1/pub/12-581-x/2010000/pop-eng.htm)  
15 [eng.htm](https://www150.statcan.gc.ca/n1/pub/12-581-x/2010000/pop-eng.htm)  
16

17  
18 33 About Ontario [Internet]. Government of Ontario. 2019 [cited 2019 Mar 17]. Available  
19 from: <https://www.ontario.ca/page/about-ontario>  
20

21 34 Government of Canada. Medical assistance in dying. Ottawa: Government of Canada,  
22 2020. Available from [https://www.canada.ca/en/health-canada/services/medical-](https://www.canada.ca/en/health-canada/services/medical-assistance-dying.html)  
23 [assistance-dying.html](https://www.canada.ca/en/health-canada/services/medical-assistance-dying.html). Accessed on 2021 Jan 20.  
24

25  
26 35 Institute for Clinical Evaluative Sciences. Data dictionary: library. Toronto, Ontario:  
27 Institute for Clinical Evaluative Sciences. Available from:  
28 <https://datadictionary.ices.on.ca/Applications/DataDictionary/Default.aspx>. Accessed  
29 2019 Feb 11.  
30

31  
32 36 Iron K, Manuel DG. Quality assessment of administrative data (QuAAD): an opportunity  
33 for enhancing Ontario's health data. Toronto, Ontario: Institute for Clinical Evaluative  
34 Sciences (ICES), 2007.  
35

36  
37 37 Iron K, Zagorski B, Sykora K. Living and dying in Ontario: An opportunity for improved  
38 health information—ICES investigative report. Toronto, Ontario: Institute for Clinical  
39 Evaluative Sciences (ICES), 2008.  
40

41 38 Institute for Clinical Evaluative Sciences. Working with ICES data. Toronto, Ontario:  
42 Institute for Clinical Evaluative Sciences (ICES) Available from: [www.ices.on.ca/Data-and-](http://www.ices.on.ca/Data-and-Privacy/ICES-data/Working-with-ICES-Data)  
43 [Privacy/ICES-data/Working-with-ICES-Data](http://www.ices.on.ca/Data-and-Privacy/ICES-data/Working-with-ICES-Data). Accessed 2019 Feb 11.  
44

45  
46 39 Ministry of Health and Long Term Care. Schedule of Benefits. Ontario: Ministry of Health  
47 and Long Term Care; 2015.  
48

49  
50 40 Ministry of Health and Long Term Care. Ontario Drug Benefit Formulary/Comparative  
51 Drug Index. Ontario: Ministry of Health and Long Term Care; 2018.  
52

53 41 Health Canada. First Annual Report on Medical Assistance in Dying in Canada 2019.  
54 Ottawa: Government of Canada, 2020. Available from  
55 [https://www.canada.ca/content/dam/hc-sc/documents/services/medical-assistance-](https://www.canada.ca/content/dam/hc-sc/documents/services/medical-assistance-dying-annual-report-2019/maid-annual-report-eng.pdf)  
56 [dying-annual-report-2019/maid-annual-report-eng.pdf](https://www.canada.ca/content/dam/hc-sc/documents/services/medical-assistance-dying-annual-report-2019/maid-annual-report-eng.pdf). Accessed on 2021 Jan 20.  
57  
58

- 1  
2  
3 42 Love R, Wolfson MC, Statistics Canada- Consumer Income and Expenditure Division.  
4 Income Inequality: Statistical Methodology and Canadian Illustrations. Ottawa: Statistics  
5 Canada. 1976.  
6
- 7 43 Alter DA, Naylor CD, Austin P, Tu JV. Effects of socioeconomic status on access to invasive  
8 cardiac procedures and on mortality after acute myocardial infarction. *New England*  
9 *Journal of Medicine*. 1999;341(18):1359-67.  
10
- 11 44 Finkelstein MM. Ecologic proxies for household income: how well do they work for the  
12 analysis of health and health care utilization? *Can J Public Health*. 2004;95(2):90-4.  
13
- 14 45 Krieger N. Overcoming the absence of socioeconomic data in medical records: validation  
15 and application of a census-based methodology. *American Journal of Public Health*.  
16 1992;82(5):703-10.  
17
- 18 46 Mustard CA, Derksen S, Berthelot JM, Wolfson M. Assessing ecologic proxies for  
19 household income: a comparison of household and neighbourhood level income measures  
20 in the study of population health status. *Health&Place*. 1999;5(2):157-71.  
21
- 22 47 Glazier RH, Creatore MI, Agha MM, Steele LS, Hwang S, Rhodes A, Steele L, Badgley R,  
23 Clark J, Cohen MM, Badley EM. Socioeconomic misclassification in Ontario's health care  
24 registry. *Canadian Journal of Public Health*. 2003;94(2):140-3.  
25
- 26 48 Statistics Canada (2006). Income and earnings reference guide, 2006 census. Catalogue  
27 no. 97-563-GWE2006003. Available at: [http://www12.statcan.gc.ca/census-](http://www12.statcan.gc.ca/census-recensement/2006/ref/rp-guides/income-revenu-eng.cfm)  
28 [recensement/2006/ref/rp-guides/income-revenu-eng.cfm](http://www12.statcan.gc.ca/census-recensement/2006/ref/rp-guides/income-revenu-eng.cfm).  
29
- 30 49 Statistics Canada. 2006 Census Dictionary. Available at: [www.statcan.gc.](http://www.statcan.gc.ca)  
31 [ca](http://www.statcan.gc.ca).  
32
- 33 50 Hayden GF, Kramer MS, Horwitz RI. The case-control study: a practical review for the  
34 clinician. *JAMA*. 1982;247(3):326-31.  
35
- 36 51 Pampalon R, Hamel D, Gamache P. A comparison of individual and area-based socio-  
37 economic data for monitoring social inequalities in health. *Health Reports*. 2009;20(4):85.  
38
- 39 52 Government of Ontario. Registered Persons Database [Internet]. Ontario: Government of  
40 Ontario; 2017 [cited 2019]. Available from: [https://www.ontario.ca/data/registered-](https://www.ontario.ca/data/registered-persons-database-rpdb)  
41 [persons-database-rpdb](https://www.ontario.ca/data/registered-persons-database-rpdb)  
42
- 43 53 Goel V, Williams JI, Anderson GM, Blackstein-Hirsch P, Fooks C, Naylor CD. Patterns of  
44 health care in Ontario - The ICES practice atlas. Ontario: ICES; 1996.  
45
- 46 54 Jaakkimainen L, Upshur R, Klein-Geltink JE, Leong A, Maaten S, Schultz SE, Wang L.  
47 Primary care in Ontario: ICES atlas. Toronto: Institute for Clinical Evaluative Sciences,  
48 2006.  
49  
50  
51  
52  
53  
54  
55  
56  
57  
58  
59  
60

- 1  
2  
3 55 Sibley LM, Moineddin R, Agha MM, Glazier RH. Risk adjustment using administrative  
4 data-based and survey-derived methods for explaining physician utilization. *Med Care*.  
5 2010;48(2):175-82.  
6  
7 56 Austin PC, van Walraven C, Wodchis WP, Newman A, Anderson GM. Using the Johns  
8 Hopkins Aggregated Diagnosis Groups (ADGs) to predict mortality in a general adult  
9 population cohort in Ontario, Canada. *Med Care*. 2011;49(10):932-9.  
10  
11 57 Guilcher SJ, Bronskill SE, Guan J, Wodchis WP. Who Are the High-Cost Users? A Method  
12 for Person-Centred Attribution of Health Care Spending. *PLoS One*. 2016 Mar  
13 3;11(3):e0149179.  
14  
15 58 Wodchis WP, Austin PC, Henry DA. A 3-year study of high-cost users of health care. *CMAJ*.  
16 2016;188(3):182-188.  
17  
18 59 Tu K, Campbell NR, Chen ZL, Cauch-Dudek KJ, McAlister FA. Accuracy of administrative  
19 databases in identifying patients with hypertension. *Open Medicine*. 2007;1(1):e18.  
20  
21 60 Gandhi S, Chiu M, Lam K, Cairney JC, Guttman A, Kurdyak P. Mental health service use  
22 among children and youth in Ontario: Population-based trends over time. *Canadian Journal*  
23 *of Psychiatry*. 2016;61(2):119-24.  
24  
25 61 Levy AR, O'Brien BJ, Sellors C, Grootendorst P, Willison D. Coding accuracy of  
26 administrative drug claims in the Ontario Drug Benefit database. *Can J Clin Pharmacol*.  
27 2003;10(2):67-71.  
28  
29 62 Redelmeier DA, Tibshirani RJ. Methods for analyzing matched designs with double  
30 controls: excess risk is easily estimated and misinterpreted when evaluating traffic deaths.  
31 *J Clin Epidemiol*. 2018;98:117-122.  
32  
33 63 Breslow NE, Day NE. Analysis of case-control studies. Lyon, France: International  
34 Agency for Research on Cancer; 1980.  
35  
36 64 Wacholder S, Weinberg CR. Paired versus two-sample design for a clinical trial of  
37 treatments with dichotomous outcome: Power considerations. *Biometrics*.  
38 1982;38(3):801-12.  
39  
40 65 Vozoris NT, Yao Z, Li P, Austin PC, Stephenson AL, Gill SS, O'Donnell DE, Gershon AS,  
41 Rochon PA. Prescription synthetic oral cannabinoid use among older adults with chronic  
42 obstructive pulmonary disease: a population-based cohort study. *Drugs & Aging*.  
43 2019;36(11):1035-45.  
44  
45 66 Cheek NN, Shafir E. The thick skin bias in judgments about people in poverty.  
46 *Behavioural Public Policy* 2020;4:1-26.  
47  
48 67 Krueger AB, Stone AA. Psychology and economics. Progress in measuring subjective well-  
49 being. *Science*. 2014;346(6205):42-3.  
50  
51  
52  
53  
54  
55  
56  
57  
58  
59  
60

- 1  
2  
3 68 Selby D, Bean S, Isenberg-Grzeda E, Bioethics BHD, Nolen A. Medical assistance in dying  
4 (MAiD): A descriptive study from a Canadian tertiary care hospital. *Am J Hosp Palliat Care*.  
5 2019. [Epub ahead of print]  
6
- 7 69 Ayers I. Fair driving: gender and race discrimination in retail car negotiations. *Harvard*  
8 *Law Review* 1991;104:817-72.  
9
- 10 70 Redelmeier DA, Cialdini RB. Problems for clinical judgement: 5. Principles of influence in  
11 medical practice. *CMAJ*. 2002;166(13):1680-4.  
12
- 13 71 Redelmeier DA, Dickinson VM. Determining whether a patient is feeling better: pitfalls  
14 from the science of human perception. *J Gen Intern Med*. 2011;26(8):900-6.  
15
- 16 72 Redelmeier DA, Dickinson VM. Judging whether a patient is actually improving: more  
17 pitfalls from the science of human perception. *J Gen Intern Med*. 2012;27(9):1195-9.  
18
- 19 73 Ho TH, Barbera L, Saskin R, Lu H, Neville BA, Earle CC. Trends in the aggressiveness of  
20 end-of-life cancer care in the universal health care system of Ontario, Canada. *Journal of*  
21 *Clinical Oncology*. 2011;29(12):1587-91.  
22
- 23 74 Tjepkema M, Wilkins R, Long A. Cause-specific mortality by income adequacy in Canada:  
24 A 16-year follow-up study. *Health Rep*. 2013;24(7):14-22.  
25
- 26 75 Prokopetz JJ, Lehmann LS. Redefining physicians' role in assisted dying. *N Engl J Med*.  
27 2012;367(2):97-9.  
28
- 29 76 Boudreau JD, Somerville MA, Biller-Andorno N. Clinical decisions. Physician-assisted  
30 suicide. *N Engl J Med*. 2013;368(15):1450-2.  
31
- 32 77 Battin MP, van der Heide A, Ganzini L, van der Wal G, Onwuteaka-Philipsen BD. Legal  
33 physician-assisted dying in Oregon and the Netherlands: evidence concerning the impact  
34 on patients in "vulnerable" groups. *J Med Ethics*. 2007;33(10):591-7.  
35
- 36 78 Steck N, Junker C, Zwahlen M; Swiss National Cohort. Increase in assisted suicide in  
37 Switzerland: did the socioeconomic predictors change? Results from the Swiss National  
38 Cohort. *BMJ Open*. 2018;8(4):e020992.  
39
- 40 79 Steck N, Junker C, Maessen M, Reisch T, Zwahlen M, Egger M, Swiss National Cohort.  
41 Suicide assisted by right-to-die associations: a population based cohort study. *International*  
42 *Journal of Epidemiology*. 2014;43(2):614-22.  
43
- 44 80 Dierickx S, Deliens L, Cohen J, Chambaere K. Comparison of the expression and granting  
45 of requests for euthanasia in Belgium in 2007 vs 2013. *JAMA Internal Medicine*.  
46 2015;175(10):1703-6.  
47
- 48 81 Sulmasy LS, Mueller PS. Ethics and the legalization of physician-assisted suicide: an  
49 American College of Physicians position paper. *Annals of Internal Medicine*.  
50 2017;167(8):576-8.  
51

- 1  
2  
3  
4 <sup>82</sup> Redelmeier DA, Detsky AS. Economic theory and medical assistance in dying. *Appl Health Econ Health Policy*. 2020. doi: 10.1007/s40258-020-00587-4.  
5  
6  
7 <sup>83</sup> Verlinde E, De Laender N, De Maesschalck S, Deveugele M, Willems S. The social gradient  
8 in doctor-patient communication. *International Journal for Equity in Health*. 2012;11(1):1-  
9 14.  
10  
11 <sup>84</sup> Wright AC, Shaw JC. The spectrum of end of life care: an argument for access to medical  
12 assistance in dying for vulnerable populations. *Medicine, Health Care and Philosophy*.  
13 2019;22(2):211-9.  
14  
15 <sup>85</sup> Voeuk A, Nekolaichuk C, Fainsinger R, Huot A. Continuous palliative sedation for  
16 existential distress? A survey of Canadian palliative care physicians' views. *J Palliat Care*.  
17 2017;32(1):26-33.  
18  
19 <sup>86</sup> Lo B. Beyond legalization — dilemmas physicians confront regarding aid in dying. *N Engl*  
20 *J Med*. 2018;378(22):2060-2.  
21  
22 <sup>87</sup> Rao JK, Anderson LA, Lin FC, Laux JP. Completion of advance directives among US  
23 consumers. *American Journal of Preventive Medicine*. 2014;46(1):65-70.  
24  
25 <sup>88</sup> McDonald JC, Du Manoir JM, Kevork N, Le LW, Zimmermann C. Advance directives in  
26 patients with advanced cancer receiving active treatment: attitudes, prevalence, and  
27 barriers. *Supportive Care in Cancer*. 2017;25(2):523-31.  
28  
29 <sup>89</sup> Selby D, Bean S. Oncologists communicating with patients about assisted dying. *Curr*  
30 *Opin Support Palliat Care*. 2019;13(1):59-63.  
31  
32 <sup>90</sup> Boudreau JD, Somerville MA, Biller-Andorno N. Clinical decisions. Physician-assisted  
33 suicide. *N Engl J Med*. 2013;368(15):1450-2.  
34  
35 <sup>91</sup> Colbert JA, Schulte J, Adler JN. Physician-assisted suicide—polling results. *N Engl J Med*.  
36 2013;369(11):e15.  
37  
38 <sup>92</sup> Miller FG, Appelbaum PS. Physician-Assisted Death for Psychiatric Patients - Misguided  
39 Public Policy. *N Engl J Med*. 2018;378(10):883-885.  
40  
41 <sup>93</sup> Hoffman KH, Trawalter S. Assumptions about life hardship and pain perception. *Group*  
42 *Processes & Intergroup Relations* 2016;19(4):493-508.  
43  
44 <sup>94</sup> Hoffman KM, Trawalter S, Axt JR, Oliver MN. Racial bias in pain assessment and  
45 treatment recommendations, and false beliefs about biological differences between blacks  
46 and whites. *Proceedings of the National Academy of Sciences*. 2016;113(16):4296-301.  
47  
48 <sup>95</sup> Cheek NN, Shafir E. The thick skin heuristic in judgments of distress about people in  
49 poverty. *Behavioural Public Policy* (in press).  
50  
51  
52  
53  
54  
55  
56  
57  
58  
59



- 1  
2  
3 96 Tversky A, Kahneman D. Judgment under uncertainty: heuristics and biases. *Science*.  
4 1974;185(4157):1124-31.  
5  
6 97 Kahneman D, Knetsch JL, Thaler RH. Experimental tests of the endowment effect and the  
7 Coase theorem. *Journal of Political Economy*. 1990;98(6):1325-48.  
8  
9 98 Kahneman D, Knetsch JL, Thaler RH. Anomalies: The endowment effect, loss aversion,  
10 and status quo bias. *Journal of Economic Perspectives*. 1991;5(1):193-206.  
11  
12 99 Mani A, Mullainathan S, Shafir E, Zhao J. Poverty impedes cognitive function. *Science*  
13 2013;341(6149):976-80.  
14  
15 100 Wamala S, Merlo J, Boström G, Hogstedt C. Perceived discrimination, socioeconomic  
16 disadvantage and refraining from seeking medical treatment in Sweden. *J Epidemiol*  
17 *Community Health*. 2007;61(5):409-15.  
18  
19 101 Hausmann LR, Hannon MJ, Kresevic DM, Hanusa BH, Kwok CK, Ibrahim SA. Impact of  
20 perceived discrimination in healthcare on patient-provider communication. *Med Care*.  
21 2011;49(7):626-33.  
22  
23 102 Hoffman KH, Trawalter S. Assumptions about life hardship and pain perception. *Group*  
24 *Processes & Intergroup Relations* 2016;19(4):493-508.  
25  
26 103 Walker AE, Becker NG. Health inequalities across socio-economic groups: comparing  
27 geographic-area-based and individual-based indicators. *Public Health*. 2005;119(12):1097-  
28 104.  
29  
30 104 Yarnell CJ, Fu L, Manuel D, Tanuseputro P, Stukel T, Pinto R, Scales DC, Laupacis A,  
31 Fowler RA. Association between immigrant status and end-of-life care in Ontario, Canada.  
32 *JAMA*. 2017;318(15):1479-1488.  
33  
34 105 Rubens M, Ramamoorthy V, Saxena A, Das S, Appunni S, Rana S, Puebla B, Suarez DT,  
35 Khawand-Azoulai M, Medina S, Viamonte-Ros A. Palliative Care Consultation Trends Among  
36 Hospitalized Patients With Advanced Cancer in the United States, 2005 to 2014. *Am J Hosp*  
37 *Palliat Care*. 2019;36(4):294-301.  
38  
39 106 Dees MK, Vernooij-Dassen MJ, Dekkers WJ, Vissers KC, Van Weel C. 'Unbearable  
40 suffering': a qualitative study on the perspectives of patients who request assistance in  
41 dying. *Journal of Medical Ethics*. 2011;37(12):727-34.  
42  
43 107 Periyakoil VS, Neri E, Kraemer H. Patient-reported barriers to high-quality, end-of-life  
44 care: A multiethnic, multilingual, mixed-methods study. *Journal of Palliative Medicine*.  
45 2016;19(4):373-9.  
46  
47 108 Shafir E. *The behavioral foundations of policy*. Princeton, New Jersey: Princeton  
48 University Press, 2013.  
49  
50  
51  
52  
53  
54  
55  
56  
57  
58  
59  
60

1  
2  
3 109 Cameron BL, Carmargo Plazas Mdel P, Salas AS, Bourque Bearskin RL, Hungler K.  
4 Understanding inequalities in access to health care services for aboriginal people: a call for  
5 nursing action. *ANS Adv Nurs Sci*. 2014;37(3):E1-E16.

6  
7 110 Dickman SL, Himmelstein DU, Woolhandler S. Inequality and the health-care system in  
8 the USA. *The Lancet*. 2017;389(10077):1431-41.

9  
10 111 Bailey ZD, Krieger N, Agénor M, Graves J, Linos N, Bassett MT. Structural racism and  
11 health inequities in the USA: evidence and interventions. *The Lancet*.  
12 2017;389(10077):1453-63.

13  
14 112 Bor J, Cohen GH, Galea S. Population health in an era of rising income inequality: USA,  
15 1980–2015. *The Lancet*. 2017;389(10077):1475-90.

16  
17 113 Converse JM. *Survey Research in the United States: Roots and Emergence 1890-1960*.  
18 Routledge, 2017.

19  
20 114 Yang YT, Curlin FA. Why physicians should oppose assisted suicide. *JAMA*.  
21 2016;315(3):247-8.

22  
23 115 Lerner BH, Caplan AL. Euthanasia in Belgium and the Netherlands: on a slippery slope?  
24 *JAMA Internal Medicine*. 2015;175(10):1640-1.

25  
26 116 Noble B. Legalising assisted dying puts vulnerable patients at risk and doctors must  
27 speak up. *BMJ Support Palliat Care*. 2013;3(3):298-9.

28  
29 117 Hadro M. How assisted suicide discriminates against the poor and disabled. Catholic  
30 News Agency. February 28, 2017.  
31 Available from: [https://www.catholicnewsagency.com/news/how-assisted-suicide-](https://www.catholicnewsagency.com/news/how-assisted-suicide-discriminates-against-the-poor-and-disabled-57444)  
32 [discriminates-against-the-poor-and-disabled-57444](https://www.catholicnewsagency.com/news/how-assisted-suicide-discriminates-against-the-poor-and-disabled-57444)

33  
34 118 Vivas L, Bastien P. Expanding MAiD criteria could irreversibly harm the most  
35 vulnerable. *Health Debate*. January 17, 2020. Available from:  
36 <https://healthydebate.ca/opinions/maid-harm-vulnerable-response>  
37  
38  
39  
40  
41  
42  
43  
44  
45  
46  
47  
48  
49  
50  
51  
52  
53  
54  
55  
56  
57  
58  
59  
60

Figure 1. Frequency of Medical Assistance in Dying

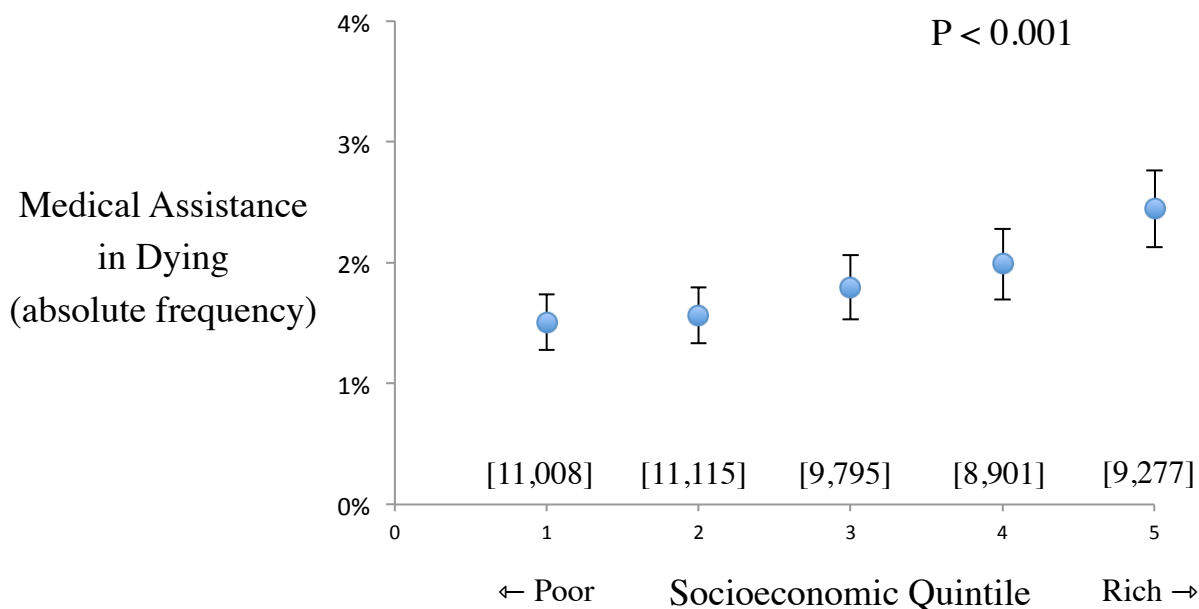

### Footnotes

Plot shows frequency of receiving medical assistance in dying among patients receiving palliative care who have different socioeconomic status. X-axis denotes quintiles of socioeconomic status spanning from lowest to highest. Y-axis denotes frequency of receiving medical assistance in dying. Solid circles indicate estimate and vertical bars indicate 95% confidence interval. Square brackets denote total patients in each analysis. P-value indicates trend. Results suggest gradient where patients with lowest socioeconomic status are less likely to receive medical assistance in dying than patients with highest socioeconomic status.

Figure 2. Consistent Reductions across Subgroups

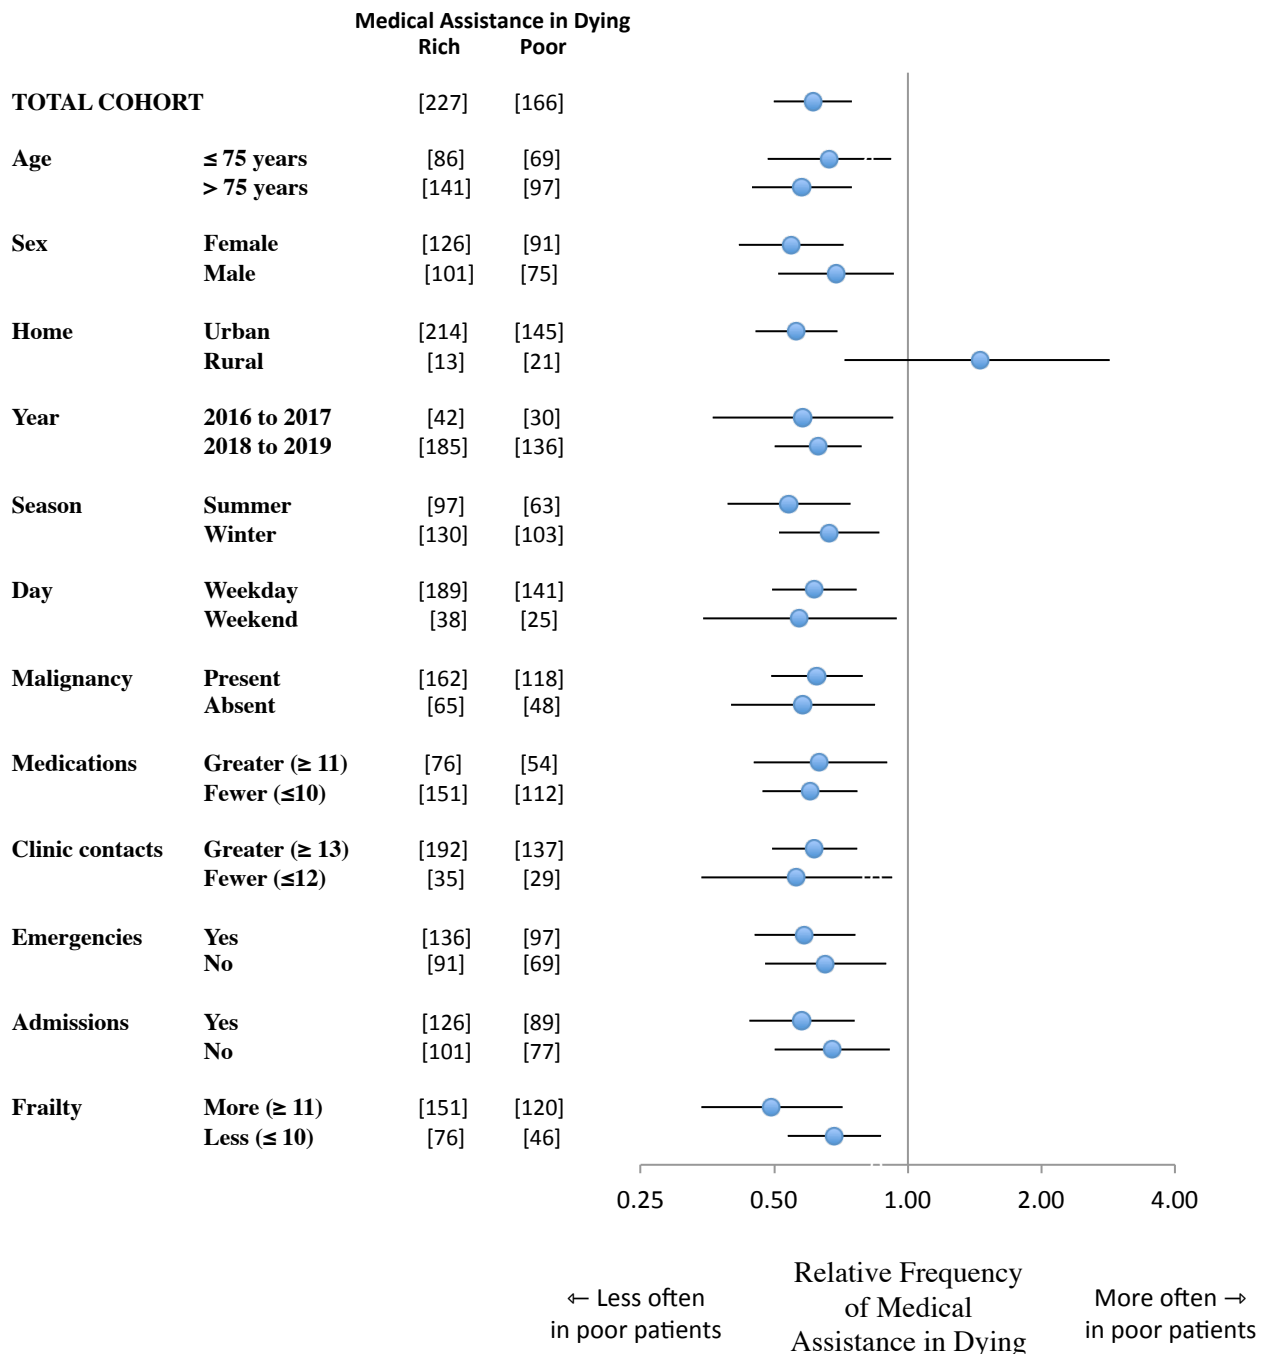

### Footnotes

Forest plot of relative frequency of receiving medical assistance in dying in different subgroups. Each analysis compares patients in lowest socioeconomic quintile to patients in highest socioeconomic quintile. Circles denote estimate and horizontal lines denote 95% confidence interval. Vertical line shows perfect equity. Square brackets show count of patients in each subgroup. Summary analysis for total cohort positioned at top. Findings show generally reduced frequency of medical assistance in dying for patients with low socioeconomic status (exception subgroup of rural home location attributable to chance).

Figure 3. Perceptions of Patient Suffering

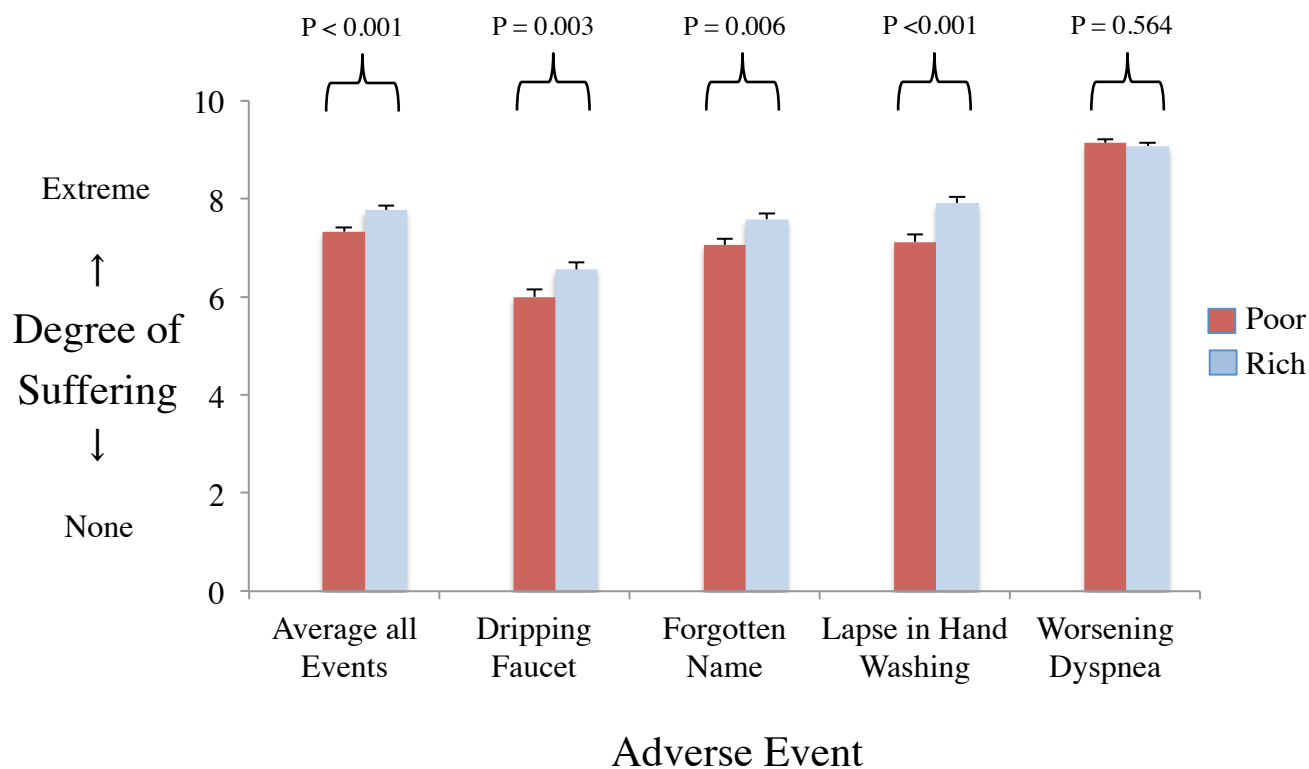

### Footnotes

Plot shows mean ratings of patient suffering from survey of clinicians (n = 494). X-axis denotes average of all adverse events and the four specific components (dripping faucet making noise, forgetting patient name despite being in hospital for days, failures of hand washing when entering room, and worsening dyspnea). Y-axis denotes mean ratings of patient suffering. Red bars for survey describing a poor patient. Blue bars for survey describing a rich patient. Vertical beams denote standard errors. P-values compare mean ratings of same adverse event. Results show significantly lower mean ratings of suffering in the poor version than rich version (exception of dyspnea).

# Appendix §1. Wording of Different Survey Versions

## Rich Version

## Poor Version

### END OF LIFE SUFFERING

Mr. FR is a 75-year-old man. He is rich, has led a life of comfort, and knows real luxury. He is admitted for a hip fracture that is newly-diagnosed as metastatic pancreatic cancer. He declines surgery and, instead, is thinking of Medical Assistance in Dying. He believes this is a grievous situation where suffering and death are foreseeable. Rate the following 4 events for their potential impact on his symptoms. (Circle one for each)

#1: FR notices the nurses never remember his name even though he has been in hospital for days. How much worse do you think this makes him feel?

0----1----2----3----4----5----6----7----8----9----10  
No Suffering Extreme Suffering

#2: FR has a bathroom sink in his room, but the faucet is leaky and constantly making a dripping noise. How much worse do you think this makes him feel?

0----1----2----3----4----5----6----7----8----9----10  
No Suffering Extreme Suffering

#3: FR has a large surgery team and often sees them fail to wash their hands when entering his room. How much worse do you think this makes him feel?

0----1----2----3----4----5----6----7----8----9----10  
No Suffering Extreme Suffering

#4: FR has worsening dyspnea and can no longer enjoy talking by phone with his granddaughter. How much worse do you think this makes him feel?

0----1----2----3----4----5----6----7----8----9----10  
No Suffering Extreme Suffering

### END OF LIFE SUFFERING

Mr. FR is a 75-year-old man. He is poor, has led a life of troubles, and knows real hardship. He is admitted for a hip fracture that is newly-diagnosed as metastatic pancreatic cancer. He declines surgery and, instead, is thinking of Medical Assistance in Dying. He believes this is a grievous situation where suffering and death are foreseeable. Rate the following 4 events for their potential impact on his symptoms. (Circle one for each)

#1: FR notices the nurses never remember his name even though he has been in hospital for days. How much worse do you think this makes him feel?

0----1----2----3----4----5----6----7----8----9----10  
No Suffering Extreme Suffering

#2: FR has a bathroom sink in his room, but the faucet is leaky and constantly making a dripping noise. How much worse do you think this makes him feel?

0----1----2----3----4----5----6----7----8----9----10  
No Suffering Extreme Suffering

#3: FR has a large surgery team and often sees them fail to wash their hands when entering his room. How much worse do you think this makes him feel?

0----1----2----3----4----5----6----7----8----9----10  
No Suffering Extreme Suffering

#4: FR has worsening dyspnea and can no longer enjoy talking by phone with his granddaughter. How much worse do you think this makes him feel?

0----1----2----3----4----5----6----7----8----9----10  
No Suffering Extreme Suffering

## Footnotes

Textbox showing exact wording of survey with rich version on left and poor version on right. Each respondent saw a single version. Sole difference between the two versions appears in the second sentence describing the patient as either rich or poor.

The design was specified in advanced based on earlier surveys conducted on lay people and professionals in non-healthcare settings (Cheek & Shafir, 2020). The survey offered limited clinical information and emphasized the primary distinction under investigation; namely, the patient's socioeconomic status.

A total of 500 surveys were originally printed (250 each with the poor and rich versions), 6 reserved for pilot testing, and the remaining 494 distributed to participants. The consent rate approached 70% (refusals not tracked) and the completion rate was 100% (no faulty or incomplete responses).

## Appendix §2. Prior Diagnoses

|                                                   | Medical Assistance<br>in Dying<br>(n = 920) | Palliative Care<br>Patients<br>(n = 49,176) |
|---------------------------------------------------|---------------------------------------------|---------------------------------------------|
| <b>Malignancy Diagnosis</b>                       |                                             |                                             |
| Mouth, ear, nose, throat                          | 24 (3)                                      | 1,699 (3)                                   |
| Digestive tract                                   | 239 (26)                                    | 12,327 (25)                                 |
| Respiratory tract                                 | 205 (22)                                    | 11,317 (23)                                 |
| Muskuloskeletal, skin, breast                     | 151 (16)                                    | 8,387 (17)                                  |
| Genitourinary tract                               | 174 (19)                                    | 9,065 (18)                                  |
| Neurologic tract                                  | 62 (7)                                      | 3,177 (6)                                   |
| Miscellaneous                                     | 360 (39)                                    | 21,058 (43)                                 |
| Hematologic                                       | 58 (6)                                      | 4,498 (9)                                   |
| <b>Non-Malignancy Diagnosis</b>                   |                                             |                                             |
| Parkinson's disease or other CNS illness          | 158 (17)                                    | 6,388 (13)                                  |
| Stroke or other CNS vascular event                | 76 (8)                                      | 7,243 (15)                                  |
| Concussion or other CNS trauma                    | 64 (7)                                      | 1,327 (3)                                   |
| Myasthenia gravis or other myo-neuropathy         | 189 (21)                                    | 15,332 (31)                                 |
| Congestive heart failure or other cardiac illness | 332 (36)                                    | 22,836 (46)                                 |
| Pulmonary fibrosis or other lung illness          | 351 (38)                                    | 22,684 (46)                                 |
| Cirrhosis or other liver failure                  | 50 (5)                                      | 3,533 (7)                                   |
| Uremia or other kidney failure                    | 77 (8)                                      | 9,214 (19)                                  |
| <b>Active Comorbidity</b>                         |                                             |                                             |
| Hypertension                                      | 169 (18)                                    | 12,050 (25)                                 |
| Acid reflux                                       | 101 (11)                                    | 6,333 (13)                                  |
| Diabetes                                          | 99 (11)                                     | 10,994 (22)                                 |
| Anemia                                            | 86 (9)                                      | 8,083 (16)                                  |
| Glaucoma                                          | 112 (12)                                    | 4,381 (9)                                   |
| Anxiety                                           | 209 (23)                                    | 10,083 (21)                                 |
| Depression                                        | 50 (5)                                      | 2,075 (4)                                   |

Footnotes

data are count (percentage) of each column

data sum to above 100% due to patients having more than 1 diagnosis

diagnoses based on ICD9 codes extracted from outpatient records in year before death

CNS denotes Central Nervous System

## Appendix §3. Prior Medications

|                                           | Medical Assistance<br>in Dying<br>(n = 920) | Palliative<br>Care<br>Patients<br>(n = 49,176) |
|-------------------------------------------|---------------------------------------------|------------------------------------------------|
| Specific Medication in Last Month of Life |                                             |                                                |
| Opioid                                    | 587 (64)                                    | 24,455 (50)                                    |
| Beta blocker                              | 119 (13)                                    | 8,247 (17)                                     |
| Calcium blocker                           | 71 (8)                                      | 5,222 (11)                                     |
| Acid suppressor                           | 284 (31)                                    | 14,679 (30)                                    |
| Diabetes medication                       | 30 (3)                                      | 3,866 (8)                                      |
| Statin                                    | 75 (8)                                      | 6,570 (13)                                     |
| Inhaled bronchodilator                    | 51 (6)                                      | 2,709 (6)                                      |
| Glaucoma medication                       | 34 (4)                                      | 1,472 (3)                                      |
| Benzodiazepine                            | 405 (44)                                    | 16,311 (33)                                    |
| Antidepressant                            | 225 (24)                                    | 10,841 (22)                                    |

Footnotes

data are count (percentage) of each column

data sum to above 100% due to patients having more than 1 medication

medications based on DIN codes extracted from outpatient records in month before death



STROBE Statement—Checklist of items that should be included in reports of *case-control studies*

|                              | Item No | Recommendation                                                                                                                                                                                     | Page Number |
|------------------------------|---------|----------------------------------------------------------------------------------------------------------------------------------------------------------------------------------------------------|-------------|
| <b>Title and abstract</b>    | 1       | (a) Indicate the study's design with a commonly used term in the title or the abstract                                                                                                             | 1           |
|                              |         | (b) Provide in the abstract an informative and balanced summary of what was done and what was found                                                                                                | 2           |
| <b>Introduction</b>          |         |                                                                                                                                                                                                    |             |
| Background/rationale         | 2       | Explain the scientific background and rationale for the investigation being reported                                                                                                               | 4           |
| Objectives                   | 3       | State specific objectives, including any prespecified hypotheses                                                                                                                                   | 4           |
| <b>Methods</b>               |         |                                                                                                                                                                                                    |             |
| Study design                 | 4       | Present key elements of study design early in the paper                                                                                                                                            | 5           |
| Setting                      | 5       | Describe the setting, locations, and relevant dates, including periods of recruitment, exposure, follow-up, and data collection                                                                    | 5-7         |
| Participants                 | 6       | (a) Give the eligibility criteria, and the sources and methods of case ascertainment and control selection. Give the rationale for the choice of cases and controls                                | 5-7         |
|                              |         | (b) For matched studies, give matching criteria and the number of controls per case                                                                                                                | 7           |
| Variables                    | 7       | Clearly define all outcomes, exposures, predictors, potential confounders, and effect modifiers. Give diagnostic criteria, if applicable                                                           | 5-7         |
| Data sources/<br>measurement | 8*      | For each variable of interest, give sources of data and details of methods of assessment (measurement). Describe comparability of assessment methods if there is more than one group               | 5-7         |
| Bias                         | 9       | Describe any efforts to address potential sources of bias                                                                                                                                          | 6-7         |
| Study size                   | 10      | Explain how the study size was arrived at                                                                                                                                                          | 5           |
| Quantitative variables       | 11      | Explain how quantitative variables were handled in the analyses. If applicable, describe which groupings were chosen and why                                                                       | 6-7         |
| Statistical methods          | 12      | (a) Describe all statistical methods, including those used to control for confounding                                                                                                              | 6-7         |
|                              |         | (b) Describe any methods used to examine subgroups and interactions                                                                                                                                | 6-7         |
|                              |         | (c) Explain how missing data were addressed                                                                                                                                                        | 5           |
|                              |         | (d) If applicable, explain how matching of cases and controls was addressed                                                                                                                        | 7           |
|                              |         | (e) Describe any sensitivity analyses                                                                                                                                                              | 6-7         |
| <b>Results</b>               |         |                                                                                                                                                                                                    |             |
| Participants                 | 13*     | (a) Report numbers of individuals at each stage of study— eg numbers potentially eligible, examined for eligibility, confirmed eligible, included in the study, completing follow-up, and analysed | 8           |

|                          |     |                                                                                                                                                                                                              |       |
|--------------------------|-----|--------------------------------------------------------------------------------------------------------------------------------------------------------------------------------------------------------------|-------|
|                          |     | (b) Give reasons for non-participation at each stage                                                                                                                                                         | 8     |
|                          |     | (c) Consider use of a flow diagram                                                                                                                                                                           |       |
| Descriptive data         | 14* | (a) Give characteristics of study participants (eg demographic, clinical, social) and information on exposures and potential confounders                                                                     | 8     |
|                          |     | (b) Indicate number of participants with missing data for each variable of interest                                                                                                                          | 8     |
| Outcome data             | 15* | Report numbers in each exposure category, or summary measures of exposure                                                                                                                                    | 8-10  |
| Main results             | 16  | (a) Give unadjusted estimates and, if applicable, confounder-adjusted estimates and their precision (eg, 95% confidence interval). Make clear which confounders were adjusted for and why they were included | 8-10  |
|                          |     | (b) Report category boundaries when continuous variables were categorized                                                                                                                                    | 8-10  |
|                          |     | (c) If relevant, consider translating estimates of relative risk into absolute risk for a meaningful time period                                                                                             | 8-10  |
| Other analyses           | 17  | Report other analyses done—eg analyses of subgroups and interactions, and sensitivity analyses                                                                                                               | 8-10  |
| <b>Discussion</b>        |     |                                                                                                                                                                                                              |       |
| Key results              | 18  | Summarise key results with reference to study objectives                                                                                                                                                     | 10-11 |
| Limitations              | 19  | Discuss limitations of the study, taking into account sources of potential bias or imprecision. Discuss both direction and magnitude of any potential bias                                                   | 12    |
| Interpretation           | 20  | Give a cautious overall interpretation of results considering objectives, limitations, multiplicity of analyses, results from similar studies, and other relevant evidence                                   | 11-12 |
| Generalisability         | 21  | Discuss the generalisability (external validity) of the study results                                                                                                                                        | 11-12 |
| <b>Other information</b> |     |                                                                                                                                                                                                              |       |
| Funding                  | 22  | Give the source of funding and the role of the funders for the present study and, if applicable, for the original study on which the present article is based                                                | 13    |

1  
2  
3  
4 \*Give information separately for cases and controls.  
5  
6

7 **Note:** An Explanation and Elaboration article discusses each checklist item and gives methodological background and  
8 published examples of transparent reporting. The STROBE checklist is best used in conjunction with this article (freely  
9 available on the Web sites of PLoS Medicine at <http://www.plosmedicine.org/>, Annals of Internal Medicine at  
10 <http://www.annals.org/>, and Epidemiology at <http://www.epidem.com/>). Information on the STROBE Initiative is  
11 available at <http://www.strobe-statement.org>.  
12  
13  
14  
15  
16  
17  
18  
19  
20  
21  
22  
23  
24  
25  
26  
27  
28  
29  
30  
31  
32  
33  
34  
35  
36  
37  
38  
39  
40  
41  
42  
43  
44  
45  
46  
47  
48  
49  
50  
51  
52  
53  
54  
55  
56  
57  
58  
59  
60
