# Supplementary material for: Association of socioeconomic status with medical assistance in dying: a case–control analysis
Source: PubMed Central journal article supplement — BMJ Open. 2021 May 25;11(5):e043547. doi: 10.1136/bmjopen-2020-043547 (PMC8154947; doi:10.1136/bmjopen-2020-043547), 2021-05-25
Supplement: bmjopen-2020-043547supp001.pdf [file bmjopen-2020-043547supp001.pdf]

## Appendix §1. Wording of Different Survey Versions

### Rich Version

END OF LIFE SUFFERING

Mr. FR is a 75-year-old man. He is rich, has led a life of comfort, and knows real luxury. He is admitted for a hip fracture that is newly-diagnosed as metastatic pancreatic cancer. He declines surgery and, instead, is thinking of Medical Assistance in Dying. He believes this is a grievous situation where suffering and death are foreseeable. Rate the following 4 events for their potential impact on his symptoms. (Circle one for each)

#1: FR notices the nurses never remember his name even though he has been in hospital for days. How much worse do you think this makes him feel?

0-----1-----2-----3-----4-----5-----6-----7-----8-----9-----10  
No Suffering Extreme Suffering

#2: FR has a bathroom sink in his room, but the faucet is leaky and constantly making a dripping noise. How much worse do you think this makes him feel?

0-----1-----2-----3-----4-----5-----6-----7-----8-----9-----10  
No Suffering Extreme Suffering

#3: FR has a large surgery team and often sees them fail to wash their hands when entering his room. How much worse do you think this makes him feel?

0-----1-----2-----3-----4-----5-----6-----7-----8-----9-----10  
No Suffering Extreme Suffering

#4: FR has worsening dyspnea and can no longer enjoy talking by phone with his granddaughter. How much worse do you think this makes him feel?

0-----1-----2-----3-----4-----5-----6-----7-----8-----9-----10  
No Suffering Extreme Suffering

### Poor Version

END OF LIFE SUFFERING

Mr. FR is a 75-year-old man. He is poor, has led a life of troubles, and knows real hardship. He is admitted for a hip fracture that is newly-diagnosed as metastatic pancreatic cancer. He declines surgery and, instead, is thinking of Medical Assistance in Dying. He believes this is a grievous situation where suffering and death are foreseeable. Rate the following 4 events for their potential impact on his symptoms. (Circle one for each)

#1: FR notices the nurses never remember his name even though he has been in hospital for days. How much worse do you think this makes him feel?

0-----1-----2-----3-----4-----5-----6-----7-----8-----9-----10  
No Suffering Extreme Suffering

#2: FR has a bathroom sink in his room, but the faucet is leaky and constantly making a dripping noise. How much worse do you think this makes him feel?

0-----1-----2-----3-----4-----5-----6-----7-----8-----9-----10  
No Suffering Extreme Suffering

#3: FR has a large surgery team and often sees them fail to wash their hands when entering his room. How much worse do you think this makes him feel?

0-----1-----2-----3-----4-----5-----6-----7-----8-----9-----10  
No Suffering Extreme Suffering

#4: FR has worsening dyspnea and can no longer enjoy talking by phone with his granddaughter. How much worse do you think this makes him feel?

0-----1-----2-----3-----4-----5-----6-----7-----8-----9-----10  
No Suffering Extreme Suffering

### Footnotes

Textbox showing exact wording of survey with rich version on left and poor version on right. Each respondent saw a single version. Sole difference between the two versions appears in the second sentence describing the patient as either rich or poor.

The design was specified in advanced based on earlier surveys conducted on lay people and professionals in non-healthcare settings (Cheek & Shafir, 2020). The survey offered limited clinical information and emphasized the primary distinction under investigation; namely, the patient's socioeconomic status.

A total of 500 surveys were originally printed (250 each with the poor and rich versions), 6 reserved for pilot testing, and the remaining 494 distributed to participants. The consent rate approached 70% (refusals not tracked) and the completion rate was 100% (no faulty or incomplete responses).

## Appendix §2. Prior Diagnoses

|                                                   | Medical Assistance in Dying (n = 920) | Palliative Care Patients (n = 49,176) |
|---------------------------------------------------|---------------------------------------|---------------------------------------|
| <b>Malignancy Diagnosis</b>                       |                                       |                                       |
| Mouth, ear, nose, throat                          | 24 (3)                                | 1,699 (3)                             |
| Digestive tract                                   | 239 (26)                              | 12,327 (25)                           |
| Respiratory tract                                 | 205 (22)                              | 11,317 (23)                           |
| Muskuloskeletal, skin, breast                     | 151 (16)                              | 8,387 (17)                            |
| Genitourinary tract                               | 174 (19)                              | 9,065 (18)                            |
| Neurologic tract                                  | 62 (7)                                | 3,177 (6)                             |
| Miscellaneous                                     | 360 (39)                              | 21,058 (43)                           |
| Hematologic                                       | 58 (6)                                | 4,498 (9)                             |
| <b>Non-Malignancy Diagnosis</b>                   |                                       |                                       |
| Parkinson's disease or other CNS illness          | 158 (17)                              | 6,388 (13)                            |
| Stroke or other CNS vascular event                | 76 (8)                                | 7,243 (15)                            |
| Concussion or other CNS trauma                    | 64 (7)                                | 1,327 (3)                             |
| Myasthenia gravis or other myo-neuropathy         | 189 (21)                              | 15,332 (31)                           |
| Congestive heart failure or other cardiac illness | 332 (36)                              | 22,836 (46)                           |
| Pulmonary fibrosis or other lung illness          | 351 (38)                              | 22,684 (46)                           |
| Cirrhosis or other liver failure                  | 50 (5)                                | 3,533 (7)                             |
| Uremia or other kidney failure                    | 77 (8)                                | 9,214 (19)                            |
| <b>Active Comorbidity</b>                         |                                       |                                       |
| Hypertension                                      | 169 (18)                              | 12,050 (25)                           |
| Acid reflux                                       | 101 (11)                              | 6,333 (13)                            |
| Diabetes                                          | 99 (11)                               | 10,994 (22)                           |
| Anemia                                            | 86 (9)                                | 8,083 (16)                            |
| Glaucoma                                          | 112 (12)                              | 4,381 (9)                             |
| Anxiety                                           | 209 (23)                              | 10,083 (21)                           |
| Depression                                        | 50 (5)                                | 2,075 (4)                             |

Footnotes

data are count (percentage) of each column

data sum to above 100% due to patients having more than 1 diagnosis

diagnoses based on ICD9 codes extracted from outpatient records in year before death

CNS denotes Central Nervous System

## Appendix §3. Prior Medications

|                                           | Medical Assistance in Dying (n = 920) | Palliative Care Patients (n = 49,176) |
|-------------------------------------------|---------------------------------------|---------------------------------------|
| Specific Medication in Last Month of Life |                                       |                                       |
| Opioid                                    | 587 (64)                              | 24,455 (50)                           |
| Beta blocker                              | 119 (13)                              | 8,247 (17)                            |
| Calcium blocker                           | 71 (8)                                | 5,222 (11)                            |
| Acid suppressor                           | 284 (31)                              | 14,679 (30)                           |
| Diabetes medication                       | 30 (3)                                | 3,866 (8)                             |
| Statin                                    | 75 (8)                                | 6,570 (13)                            |
| Inhaled bronchodilator                    | 51 (6)                                | 2,709 (6)                             |
| Glaucoma medication                       | 34 (4)                                | 1,472 (3)                             |
| Benzodiazepine                            | 405 (44)                              | 16,311 (33)                           |
| Antidepressant                            | 225 (24)                              | 10,841 (22)                           |

Footnotes

data are count (percentage) of each column

data sum to above 100% due to patients having more than 1 medication

medications based on DIN codes extracted from outpatient records in month before death
